# Supplementary material
Source: PubMed Central journal article supplement (PMC2829611)
Supplement: 09_146_Deaglio_Suppl.pdf [file 09_146_Deaglio_Suppl.pdf]

| Accession #  | Name         | Description                                                                                                                                                | L-CD31+ vs L-mock | p value     |
|--------------|--------------|------------------------------------------------------------------------------------------------------------------------------------------------------------|-------------------|-------------|
| NM_199203    | Kua-UEV      | Ubiquitin-conjugating enzyme E2 variant 1                                                                                                                  | -12.01382         | 7.62476E-07 |
| NM_004218    | RAB11B       | RAB11B, member RAS oncogene family                                                                                                                         | 12.37772          | 5.9108E-07  |
| NM_006544    | EXOC5        | Exocyst complex component 5                                                                                                                                | 10.28434          | 2.8321E-06  |
| NM_212472    | PRKAR1A      | Protein kinase, cAMP-dependent, regulatory, type I, alpha (tissue specific extinguisher 1)                                                                 | 16.0055           | 6.41336E-08 |
| NM_003934    | FUBP3        | Far upstream element (FUSE) binding protein 3                                                                                                              | 10.04849          | 3.43697E-06 |
| NM_153693    | HOXC6        | Homeobox C4                                                                                                                                                | 10.30985          | 2.77405E-06 |
| NM_022491    | SUDS3        | Suppressor of defective silencing 3 homolog (S. cerevisiae)                                                                                                | -11.04648         | 1.55368E-06 |
| NM_015330    | SPECC1L      | SPECC1-like                                                                                                                                                | -10.25039         | 2.91144E-06 |
| NM_001429    | EP300        | E1A binding protein p300                                                                                                                                   | -11.65812         | 9.84564E-07 |
| BX090412     | BX090412     | Transcribed locus                                                                                                                                          | -14.57157         | 1.45057E-07 |
| NM_001261    | CDK9         | Cyclin-dependent kinase 9 (CDC2-related kinase)                                                                                                            | 9.86276           | 4.01395E-06 |
| NM_002661    | PLCG2        | Phospholipase C, gamma 2 (phosphatidylinositol-specific)                                                                                                   | -11.67385         | 9.73359E-07 |
| NM_000945    | PPP3R1       | Protein phosphatase 3 (formerly 2B), regulatory subunit B, 19kDa, alpha isoform (calcineurin B, type I)                                                    | 9.70376           | 4.59333E-06 |
| NM_177965    | C8orf37      | Chromosome 8 open reading frame 37                                                                                                                         | 12.04077          | 7.48054E-07 |
| NM_024325    | ZNF343       | Zinc finger protein 343                                                                                                                                    | -9.47095          | 5.61486E-06 |
| NM_025136    | OPA3         | Optic atrophy 3 (autosomal recessive, with chorea and spastic paraplegia)                                                                                  | 9.4887            | 5.52874E-06 |
| NM_201266    | NRP2         | Neuropilin 2                                                                                                                                               | 10.06726          | 3.38394E-06 |
| NM_019028    | ZDHHC13      | Zinc finger, DHHC-type containing 13                                                                                                                       | 9.82075           | 4.15875E-06 |
| THC2304728   | THC2304728   | N1L4_HUMAN (Q99733) Nucleosome assembly protein 1-like 4 (Nucleosome assembly protein 2) (NAP2), partial (59%) [THC2304728]                                | 9.63357           | 4.87791E-06 |
| NM_000123    | ERCC5        | Excision repair cross-complementing rodent repair deficiency, complementation group 5 (xeroderma pigmentosum, complementation group G (Cockayne syndrome)) | -10.55662         | 2.27557E-06 |
| NM_007363    | NONO         | Non-POU domain containing, octamer-binding                                                                                                                 | -10.45614         | 2.4655E-06  |
| NM_006595    | API5         | Apoptosis inhibitor 5                                                                                                                                      | 10.44438          | 2.48886E-06 |
| AA832084     | ARHGDI1A     | Rho GDP dissociation inhibitor (GDI) alpha                                                                                                                 | 9.99145           | 3.60381E-06 |
| NM_020640    | DCUN1D1      | DCN1, defective in cullin neddylation 1, domain containing 1 (S. cerevisiae)                                                                               | 10.73637          | 1.97476E-06 |
| NM_016040    | TMED5        | Transmembrane emp24 protein transport domain containing 5                                                                                                  | 11.90305          | 8.25054E-07 |
| NM_182540    | DDX26B       | DEAD/H (Asp-Glu-Ala-Asp/His) box polypeptide 26B                                                                                                           | -10.73728         | 1.97335E-06 |
| NM_003893    | LDB1         | LIM domain binding 1                                                                                                                                       | 10.7935           | 1.88856E-06 |
| NM_016545    | IER5         | Immediate early response 5                                                                                                                                 | 10.53902          | 2.30764E-06 |
| NM_006805    | HNRPA0       | Heterogeneous nuclear ribonucleoprotein A0                                                                                                                 | 9.18978           | 7.19589E-06 |
| NM_001229    | CASP9        | Caspase 9, apoptosis-related cysteine peptidase                                                                                                            | -12.50316         | 5.42256E-07 |
| NM_004614    | TK2          | Thymidine kinase 2, mitochondrial                                                                                                                          | 8.99903           | 8.54562E-06 |
| NM_014876    | JOSD1        | Josephin domain containing 1                                                                                                                               | 8.61553           | 0.00001     |
| NM_006459    | SPFH1        | SPFH domain family, member 1                                                                                                                               | 9.04944           | 8.16368E-06 |
| THC2400714   | THC2400714   | Unknown                                                                                                                                                    | -9.97506          | 3.65339E-06 |
| NM_152734    | C6orf89      | Chromosome 6 open reading frame 89                                                                                                                         | 12.84733          | 4.29726E-07 |
| NM_012426    | SF3B3        | Splicing factor 3b, subunit 3, 130kDa                                                                                                                      | 9.53653           | 5.30387E-06 |
| A_23_P207143 | A_23_P207143 | Unknown                                                                                                                                                    | 8.51395           | 0.00001     |
| NM_144726    | FLJ31951     | hypothetical protein FLJ31951                                                                                                                              | 12.17957          | 6.7841E-07  |
| NM_005109    | OXSR1        | Oxidative-stress responsive 1                                                                                                                              | 9.0603            | 8.08387E-06 |
| Y10152       | CRHR2        | Corticotropin releasing hormone receptor 2                                                                                                                 | 10.38139          | 2.61814E-06 |
| NM_014554    | SENP1        | SUMO1/sentrin specific peptidase 1                                                                                                                         | 8.65206           | 0.00001     |
| NM_022171    | TCTA         | T-cell leukemia translocation altered gene                                                                                                                 | 8.52684           | 0.00001     |
| NM_006565    | CTCF         | CCCTC-binding factor (zinc finger protein)                                                                                                                 | 8.69879           | 0.00001     |
| A_24_P290214 | A_24_P290214 | Unknown                                                                                                                                                    | 8.54654           | 0.00001     |
| NM_052987    | CDK10        | Cyclin-dependent kinase (CDC2-like) 10                                                                                                                     | 9.19897           | 7.13708E-06 |
| NM_016506    | KBTBD4       | Mitochondrial carrier homolog 2 (C. elegans)                                                                                                               | -9.39145          | 6.01911E-06 |
| NM_005026    | PIK3CD       | Phosphoinositide-3-kinase, catalytic, delta polypeptide                                                                                                    | 8.93923           | 9.02436E-06 |
| NM_020462    | ERGIC1       | Endoplasmic reticulum-golgi intermediate compartment (ERGIC) 1                                                                                             | 12.75714          | 4.5648E-07  |
| NM_003005    | SELP         | Selectin P (granule membrane protein 140kDa, antigen CD62)                                                                                                 | -10.38446         | 2.61168E-06 |
| NM_007126    | VCP          | Valosin-containing protein                                                                                                                                 | 8.20306           | 0.00002     |
| NM_015349    | KIAA0240     | KIAA0240                                                                                                                                                   | -8.93919          | 9.02463E-06 |
| NM_177966    | 2'-PDE       | 2'-phosphodiesterase                                                                                                                                       | 9.44127           | 5.76213E-06 |
| NM_015184    | PLCL2        | Phospholipase C-like 2                                                                                                                                     | -9.67039          | 4.72625E-06 |
| NM_013236    | ATXN10       | Ataxin 10                                                                                                                                                  | 9.30208           | 6.51217E-06 |
| A_24_P581311 | A_24_P581311 | Unknown                                                                                                                                                    | 8.04345           | 0.00002     |
| A_24_P400616 | A_24_P400616 | Unknown                                                                                                                                                    | 7.90396           | 0.00002     |
| NM_174907    | PPP4R2       | Protein phosphatase 4, regulatory subunit 2                                                                                                                | 8.18701           | 0.00002     |
| NM_017897    | OXSM         | 3-oxoacyl-ACP synthase, mitochondrial                                                                                                                      | -10.2951          | 2.80746E-06 |

|              |              |                                                                                                |           |             |
|--------------|--------------|------------------------------------------------------------------------------------------------|-----------|-------------|
| NM_054027    | ANKH         | Ankylosis, progressive homolog (mouse)                                                         | 9.32545   | 6.37908E-06 |
| NM_005498    | AP1M2        | Adaptor-related protein complex 1, mu 2 subunit                                                | 8.86146   | 9.69158E-06 |
| NM_005986    | SOX1         | SRY (sex determining region Y)-box 1                                                           | 13.28268  | 3.22755E-07 |
| NM_007236    | CHP          | calcium binding protein P22                                                                    | 14.02006  | 2.02561E-07 |
| BC034752     | C9orf62      | Chromosome 9 open reading frame 62                                                             | 10.18258  | 3.07735E-06 |
| NM_022067    | C14orf133    | Chromosome 14 open reading frame 133                                                           | -8.90563  | 9.30619E-06 |
| NM_002709    | PPP1CB       | Protein phosphatase 1, catalytic subunit, beta isoform                                         | 8.0112    | 0.00002     |
| NM_016312    | WBP11        | WW domain binding protein 11                                                                   | -10.32371 | 2.74306E-06 |
| NM_006391    | IPO7         | Importin 7                                                                                     | 9.46839   | 5.62738E-06 |
| NM_022107    | GPSM3        | G-protein signalling modulator 3 (AGS3-like, C. elegans)                                       | 9.33884   | 6.30415E-06 |
| NM_001190    | BCAT2        | Branched chain aminotransferase 2, mitochondrial                                               | 8.2365    | 0.00002     |
| NM_031892    | SH3KBP1      | SH3-domain kinase binding protein 1                                                            | 8.18059   | 0.00002     |
| BC004815     | MGC5139      | hypothetical protein MGC5139                                                                   | -11.00369 | 1.60539E-06 |
| NM_001417    | EIF4B        | Eukaryotic translation initiation factor 4B                                                    | 11.08825  | 1.50497E-06 |
| NM_017615    | NSMCE4A      | Non-SMC element 4 homolog A (S. cerevisiae)                                                    | 8.20619   | 0.00002     |
| NM_153335    | LYK5         | protein kinase LYK5                                                                            | -14.13835 | 1.88372E-07 |
| AK074764     | SDHALP2      | Succinate dehydrogenase complex, subunit A, flavoprotein pseudogene 2                          | 7.93021   | 0.00002     |
| NM_005298    | GPR25        | G protein-coupled receptor 25                                                                  | 9.62722   | 4.90459E-06 |
| NM_033547    | INTS4        | Integrator complex subunit 4                                                                   | 9.65114   | 4.8049E-06  |
| A_24_P780709 | A_24_P780709 | Unknown                                                                                        | 9.37541   | 6.10447E-06 |
| NM_005163    | AKT1         | V-akt murine thymoma viral oncogene homolog 1                                                  | 8.33875   | 0.00002     |
| NM_012316    | KPNA6        | Karyopherin alpha 6 (importin alpha 7)                                                         | -11.38421 | 1.20449E-06 |
| A_24_P144556 | A_24_P144556 | Unknown                                                                                        | 8.55649   | 0.00001     |
| NM_001128    | AP1G1        | Adaptor-related protein complex 1, gamma 1 subunit                                             | -11.10174 | 1.4896E-06  |
| NM_001039651 | C6orf26      | MutS homolog 5 (E. coli)                                                                       | -9.24198  | 6.86871E-06 |
| NM_130791    | WWOX         | WW domain containing oxidoreductase                                                            | 9.20432   | 7.10308E-06 |
| NM_004082    | DCTN1        | Dynactin 1 (p150, glued homolog, Drosophila)                                                   | 10.47834  | 2.42208E-06 |
| NM_031454    | SELO         | selenoprotein O                                                                                | 10.02399  | 3.50756E-06 |
| NM_006544    | EXOC5        | Exocyst complex component 5                                                                    | 8.34375   | 0.00002     |
| NM_020960    | GPR107       | G protein-coupled receptor 107                                                                 | -10.56817 | 2.25479E-06 |
| NM_203364    | GPIAP1       | GPI-anchored membrane protein 1                                                                | 7.64062   | 0.00003     |
| NM_144576    | COQ10A       | Coenzyme Q10 homolog A (S. cerevisiae)                                                         | -8.26821  | 0.00002     |
| NM_003089    | SNRP70       | Small nuclear ribonucleoprotein 70kDa polypeptide (RNP antigen)                                | 8.47566   | 0.00001     |
| NM_005839    | SRRM1        | Serine/arginine repetitive matrix 1                                                            | -10.29528 | 2.80705E-06 |
| NM_016604    | JMJD1B       | Jumonji domain containing 1B                                                                   | -10.08354 | 3.3387E-06  |
| NM_178438    | LCE5A        | Late cornified envelope 5A                                                                     | 9.60463   | 5.00087E-06 |
| AK074764     | SDHALP2      | Succinate dehydrogenase complex, subunit A, flavoprotein pseudogene 2                          | 8.66586   | 0.00001     |
| NM_002109    | HARS         | Histidyl-tRNA synthetase                                                                       | -9.09351  | 7.84517E-06 |
| NM_152219    | GJC1         | Gap junction protein, chi 1, 31.9kDa (connexin 31.9)                                           | 10.85341  | 1.8026E-06  |
| NM_032322    | RNF135       | Ring finger protein 135                                                                        | -9.9372   | 3.77077E-06 |
| A_23_P369758 | A_23_P369758 | Unknown                                                                                        | 10.8002   | 1.87873E-06 |
| NM_001933    | DLST         | Dihydrolipoamide S-succinyltransferase (E2 component of 2-oxo-glutarate complex)               | 7.44271   | 0.00004     |
| NM_015600    | ABHD12       | Abhydrolase domain containing 12                                                               | 7.97343   | 0.00002     |
| NM_012215    | MGEA5        | Meningioma expressed antigen 5 (hyaluronidase)                                                 | -9.01908  | 8.39141E-06 |
| NM_004831    | CRSP7        | Cofactor required for Sp1 transcriptional activation, subunit 7, 70kDa                         | 8.94066   | 9.01256E-06 |
| NM_016143    | NSFL1C       | NSFL1 (p97) cofactor (p47)                                                                     | -7.96774  | 0.00002     |
| NM_139013    | MAPK14       | Mitogen-activated protein kinase 14                                                            | 8.46192   | 0.00001     |
| CR621132     | NSUN7        | Full-length cDNA clone CS0DC015YK09 of Neuroblastoma Cot 25-normalized of Homo sapiens (human) | -7.48544  | 0.00004     |
| NM_001005404 | YPEL2        | Yippee-like 2 (Drosophila)                                                                     | -8.59126  | 0.00001     |
| NM_153334    | SCARF2       | Scavenger receptor class F, member 2                                                           | 7.52965   | 0.00004     |
| NM_018416    | FOXJ2        | Forkhead box J2                                                                                | -8.811    | 0.00001     |
| NM_014607    | UBXD2        | UBX domain containing 2                                                                        | 8.99319   | 8.59109E-06 |
| NM_025263    | PRR3         | Major histocompatibility complex, class I, E                                                   | 8.13755   | 0.00002     |
| NM_052853    | ADCK2        | AarF domain containing kinase 2                                                                | -9.20982  | 7.06829E-06 |
| THC2316116   | THC2316116   | Unknown                                                                                        | -9.80843  | 4.20233E-06 |
| AK023797     | KIAA0672     | KIAA0672 gene product                                                                          | -12.98441 | 3.92319E-07 |
| NM_025207    | FLAD1        | FAD1 flavin adenine dinucleotide synthetase homolog (S. cerevisiae)                            | 8.22176   | 0.00002     |
| BQ548663     | ALOX5        | Arachidonate 5-lipoxygenase                                                                    | -8.8633   | 9.67523E-06 |
| A_24_P101493 | A_24_P101493 | Unknown                                                                                        | 8.46769   | 0.00001     |

|              |              |                                                                                                               |           |             |
|--------------|--------------|---------------------------------------------------------------------------------------------------------------|-----------|-------------|
| NM_018144    | SEC61A2      | Sec61 alpha 2 subunit ( <i>S. cerevisiae</i> )                                                                | 8.43895   | 0.00001     |
| NM_002593    | PCOLCE       | Procollagen C-endopeptidase enhancer                                                                          | 7.63508   | 0.00003     |
| NM_024545    | SAP130       | Sin3A-associated protein, 130kDa                                                                              | -8.3626   | 0.00002     |
| NM_005744    | ARIH1        | Ariadne homolog, ubiquitin-conjugating enzyme E2 binding protein, 1 ( <i>Drosophila</i> )                     | 14.02495  | 2.01951E-07 |
| CR627148     | LOC728649    | hypothetical protein LOC728649                                                                                | -12.98113 | 3.93171E-07 |
| NM_173833    | SCARA5       | Scavenger receptor class A, member 5 (putative)                                                               | 10.19322  | 3.05064E-06 |
| NM_014337    | PPIL2        | Peptidylprolyl isomerase (cyclophilin)-like 2                                                                 | 10.82689  | 1.84012E-06 |
| NM_003791    | MBTPS1       | Membrane-bound transcription factor peptidase, site 1                                                         | -13.00009 | 3.88276E-07 |
| NM_182543    | NSUN6        | NOL1/NOP2/Sun domain family, member 6                                                                         | -7.91983  | 0.00002     |
| NM_197957    | MAX          | MYC associated factor X                                                                                       | 8.86102   | 9.69551E-06 |
| NM_014669    | NUP93        | Nucleoporin 93kDa                                                                                             | 7.4057    | 0.00004     |
| NM_006522    | WNT6         | Wingless-type MMTV integration site family, member 6                                                          | 8.10676   | 0.00002     |
| NM_170662    | CBLB         | Cas-Br-M (murine) ecotropic retroviral transforming sequence b                                                | -7.59917  | 0.00003     |
| NM_014800    | ELMO1        | Engulfment and cell motility 1                                                                                | -8.86216  | 9.68535E-06 |
| NM_014932    | NLGN1        | Neuroigin 1                                                                                                   | 11.85202  | 8.55769E-07 |
| NM_000401    | EXT2         | Exostoses (multiple) 2                                                                                        | -11.00481 | 0.000001604 |
| NM_000439    | PCSK1        | Proprotein convertase subtilisin/kexin type 1                                                                 | 10.68261  | 2.05985E-06 |
| NM_032228    | MLSTD2       | Male sterility domain containing 2                                                                            | 7.87725   | 0.00003     |
| NM_015575    | TNRC15       | Trinucleotide repeat containing 15                                                                            | 10.81159  | 1.86214E-06 |
| NM_032383    | HPS3         | Hermansky-Pudlak syndrome 3                                                                                   | -7.7146   | 0.00003     |
| NM_014303    | PES1         | Pescadillo homolog 1, containing BRCT domain (zebrafish)                                                      | 11.27587  | 1.30602E-06 |
| NM_138811    | C7orf31      | Chromosome 7 open reading frame 31                                                                            | -7.84466  | 0.00003     |
| THC2306788   | THC2306788   | ALU1_HUMAN (P39188) Alu subfamily J sequence contamination warning entry, partial (10%) [THC2306788]          | 8.36187   | 0.00002     |
| NM_001077207 | SEC31A       | SEC31 homolog A ( <i>S. cerevisiae</i> )                                                                      | -10.01301 | 3.53971E-06 |
| NM_021030    | ZNF14        | Zinc finger protein 14                                                                                        | -9.40692  | 5.93797E-06 |
| NM_001002259 | C1QDC1       | C1q domain containing 1                                                                                       | -7.34532  | 0.00004     |
| NM_005370    | RAB8A        | RAB8A, member RAS oncogene family                                                                             | 8.28127   | 0.00002     |
| AK131269     | MBOAT1       | Membrane bound O-acyltransferase domain containing 1                                                          | -9.47467  | 5.5967E-06  |
| NM_005827    | SLC35B1      | Solute carrier family 35, member B1                                                                           | 8.26348   | 0.00002     |
| A_24_P332754 | A_24_P332754 | Unknown                                                                                                       | 7.25643   | 0.00005     |
| NM_031992    | EIF4H        | Eukaryotic translation initiation factor 4H                                                                   | 8.331     | 0.00002     |
| NM_001011658 | TRAPPC2      | Trafficking protein particle complex 2                                                                        | -9.81802  | 4.16839E-06 |
| NM_198563    | TMEM110      | Transmembrane protein 110                                                                                     | 7.20495   | 0.00005     |
| NM_024419    | PGS1         | Phosphatidylglycerophosphate synthase 1                                                                       | 11.5625   | 1.05585E-06 |
| THC2284389   | THC2284389   | C40201 artifact-warning sequence (translated ALU class C) - human {Homo sapiens;} , partial (6%) [THC2284389] | -8.27074  | 0.00002     |
| NR_002144    | LOC407835    | Homo sapiens mitogen-activated protein kinase kinase 2 pseudogene (LOC407835) on chromosome 7.                | 7.15658   | 0.00005     |
| NM_012179    | FBXO7        | F-box protein 7                                                                                               | -8.73795  | 0.00001     |
| NM_016076    | C1orf121     | Chromosome 1 open reading frame 121                                                                           | 11.06158  | 1.53587E-06 |
| A_24_P878366 | A_24_P878366 | Unknown                                                                                                       | 13.11769  | 3.59374E-07 |
| NM_032336    | GINS4        | Golgi autoantigen, golgin subfamily a, 7                                                                      | 7.52996   | 0.00004     |
| NM_004530    | MMP2         | Matrix metalloproteinase 2 (gelatinase A, 72kDa gelatinase, 72kDa type IV collagenase)                        | 12.50249  | 5.42507E-07 |
| A_32_P83520  | A_32_P83520  | Unknown                                                                                                       | 8.84018   | 9.8835E-06  |
| NM_198976    | TH1L         | TH1-like ( <i>Drosophila</i> )                                                                                | 6.989     | 0.00006     |
| NM_017668    | NDE1         | NudE nuclear distribution gene E homolog 1 ( <i>A. nidulans</i> )                                             | 7.69641   | 0.00003     |
| NM_198963    | DHX57        | DEAH (Asp-Glu-Ala-Asp/His) box polypeptide 57                                                                 | -10.92259 | 1.70868E-06 |
| NM_006101    | KNTC2        | Kinetochore associated 2                                                                                      | 7.11802   | 0.00006     |
| NM_002967    | SAFB         | Scaffold attachment factor B                                                                                  | 7.17136   | 0.00005     |
| NM_017745    | BCOR         | BCL6 co-repressor                                                                                             | 8.15186   | 0.00002     |
| NM_006711    | RNPS1        | RNA binding protein S1, serine-rich domain                                                                    | 7.2874    | 0.00005     |
| NM_014268    | MAPRE2       | Microtubule-associated protein, RP/EB family, member 2                                                        | 7.51812   | 0.00004     |
| BC057844     | BC057844     | CDNA clone MGC:71846 IMAGE:5313492                                                                            | 10.04434  | 3.44883E-06 |
| NM_002525    | NRD1         | Nardilysin (N-arginine dibasic convertase)                                                                    | -9.26143  | 0.000006751 |
| NM_014089    | NUPL1        | Nucleoporin like 1                                                                                            | 7.10305   | 0.00006     |
| NM_007131    | ZNF75        | Zinc finger protein 75 (D8C6)                                                                                 | -8.06537  | 0.00002     |
| NM_014877    | HELZ         | Helicase with zinc finger                                                                                     | -10.7689  | 1.92516E-06 |
| NM_012478    | WBP2         | WW domain binding protein 2                                                                                   | 8.60644   | 0.00001     |
| NM_001620    | AHNAK        | AHNAK nucleoprotein (desmoyokin)                                                                              | 7.85031   | 0.00003     |
| NM_018195    | C11orf57     | Chromosome 11 open reading frame 57                                                                           | -8.5476   | 0.00001     |
| NM_024541    | C10orf76     | Chromosome 10 open reading frame 76                                                                           | 9.53683   | 5.30248E-06 |

|              |              |                                                                                                            |           |             |
|--------------|--------------|------------------------------------------------------------------------------------------------------------|-----------|-------------|
| NM_016290    | UIMC1        | Ubiquitin interaction motif containing 1                                                                   | -7.07217  | 0.00006     |
| NM_015005    | KIAA0284     | KIAA0284                                                                                                   | 9.65504   | 4.78885E-06 |
| BC002431     | B4GALT2      | UDP-Gal:betaGlcNAc beta 1,4- galactosyltransferase, polypeptide 2                                          | 10.07832  | 3.35313E-06 |
| NM_014760    | TATDN2       | TatD DNase domain containing 2                                                                             | -7.94034  | 0.00002     |
| NM_024881    | SLC35E1      | Solute carrier family 35, member E1                                                                        | 8.64898   | 0.00001     |
| NM_003111    | SP3          | Sp3 transcription factor                                                                                   | 10.18982  | 3.05914E-06 |
| NM_019024    | KIAA1414     | KIAA1414 protein                                                                                           | -10.63453 | 2.13938E-06 |
| NM_138707    | BCL7B        | B-cell CLL/lymphoma 7B                                                                                     | 7.05423   | 0.00006     |
| NM_016824    | ADD3         | Adducin 3 (gamma)                                                                                          | -7.17037  | 0.00005     |
| NM_004309    | ARHGDI3      | Rho GDP dissociation inhibitor (GDI) alpha                                                                 | 8.3467    | 0.00002     |
| THC2314371   | THC2314371   | ALU8_HUMAN (P39195) Alu subfamily SX sequence contamination warning entry, partial (10%) [THC2314371]      | -8.75011  | 0.00001     |
| NM_016079    | VPS24        | Vacuolar protein sorting 24 homolog (S. cerevisiae)                                                        | 10.94974  | 1.67331E-06 |
| NM_013282    | UHRF1        | Ubiquitin-like, containing PHD and RING finger domains, 1                                                  | 7.78277   | 0.00003     |
| NM_032775    | KLHL22       | Kelch-like 22 (Drosophila)                                                                                 | 7.71952   | 0.00003     |
| NM_020648    | TWSG1        | Twisted gastrulation homolog 1 (Drosophila)                                                                | 7.84782   | 0.00003     |
| THC2444634   | THC2444634   | AF195969 rho GTPase activating protein 8 isoform 2 {Homo sapiens;} , partial (8%) [THC2444634]             | 8.87065   | 9.60999E-06 |
| AK056150     | LOC149478    | hypothetical protein LOC149478                                                                             | 7.34421   | 0.00004     |
| A_24_P101181 | A_24_P101181 | Unknown                                                                                                    | 7.72485   | 0.00003     |
| NM_014657    | KIAA0406     | KIAA0406                                                                                                   | 13.42386  | 2.94683E-07 |
| NM_004808    | NMT2         | N-myristoyltransferase 2                                                                                   | -6.83368  | 0.00008     |
| NM_004249    | RAB28        | RAB28, member RAS oncogene family                                                                          | 7.06441   | 0.00006     |
| NM_018121    | C10orf6      | Chromosome 10 open reading frame 6                                                                         | -9.42738  | 5.83253E-06 |
| NM_012395    | PFTK1        | PFTAIRE protein kinase 1                                                                                   | -7.45833  | 0.00004     |
| NM_080596    | HIST1H2AH    | Histone cluster 1, H2ai                                                                                    | 7.1406    | 0.00005     |
| NM_003806    | HRK          | Harakiri, BCL2 interacting protein (contains only BH3 domain)                                              | 6.88927   | 0.00007     |
| NM_032438    | L3MBTL3      | L(3)mbt-like 3 (Drosophila)                                                                                | -7.00205  | 0.00006     |
| NM_006290    | TNFAIP3      | Tumor necrosis factor, alpha-induced protein 3                                                             | 8.65812   | 0.00001     |
| NM_015061    | JMJD2C       | Jumonji domain containing 2C                                                                               | -10.21014 | 3.00869E-06 |
| NM_153813    | ZFPM1        | Zinc finger protein, multitype 1                                                                           | 8.03175   | 0.00002     |
| BC040982     | PIK3C3       | Phosphoinositide-3-kinase, class 3                                                                         | -8.2424   | 0.00002     |
| NM_001012651 | NKTR         | Natural killer-tumor recognition sequence                                                                  | -8.32262  | 0.00002     |
| BC028192     | LOC161635    | similar to casein kinase I alpha                                                                           | 6.79522   | 0.00008     |
| AK002023     | FLJ25715     | CDNA FLJ11161 fis, clone PLACE1007021                                                                      | -9.2345   | 6.9146E-06  |
| NM_001684    | ATP2B4       | ATPase, Ca++ transporting, plasma membrane 4                                                               | 9.10183   | 7.78657E-06 |
| NM_004171    | SLC1A2       | Homo sapiens solute carrier family 1 (glial high affinity glutamate transporter), member 2 (SLC1A2), mRNA. | 7.93271   | 0.00002     |
| NM_006766    | MYST3        | MYST histone acetyltransferase (monocytic leukemia) 3                                                      | -8.77256  | 0.00001     |
| NM_018622    | PARL         | Presenilin associated, rhomboid-like                                                                       | 8.68819   | 0.00001     |
| NM_006224    | PITPNA       | Phosphatidylinositol transfer protein, alpha                                                               | 6.70394   | 0.00009     |
| NM_002873    | RAD17        | RAD17 homolog (S. pombe)                                                                                   | -8.20583  | 0.00002     |
| THC2280638   | THC2280638   | RL2A_HUMAN (P46776) 60S ribosomal protein L27a, partial (24%) [THC2280638]                                 | -7.53358  | 0.00004     |
| BX427435     | BX427435     | Transcribed locus                                                                                          | 7.05574   | 0.00006     |
| NM_001017395 | TMCC1        | Transmembrane and coiled-coil domain family 1                                                              | 7.44023   | 0.00004     |
| A_24_P502660 | A_24_P502660 | Unknown                                                                                                    | 8.49614   | 0.00001     |
| NM_181838    | UBE2D2       | Ubiquitin-conjugating enzyme E2D 2 (UBC4/5 homolog, yeast)                                                 | -14.33002 | 1.67656E-07 |
| NM_002468    | MYD88        | Myeloid differentiation primary response gene (88)                                                         | 7.41285   | 0.00004     |
| NM_022487    | DCLRE1C      | DNA cross-link repair 1C (PSO2 homolog, S. cerevisiae)                                                     | -8.35217  | 0.00002     |
| NM_032364    | DNAJC14      | DnaJ (Hsp40) homolog, subfamily C, member 14                                                               | -11.12091 | 1.46806E-06 |
| NM_002737    | PRKCA        | Protein kinase C, alpha                                                                                    | 11.80087  | 8.87837E-07 |
| BQ317309     | GC3H         | Glycine cleavage system protein H (aminomethyl carrier)                                                    | 6.8177    | 0.00008     |
| NM_014360    | NKX2-8       | NK2 transcription factor related, locus 8 (Drosophila)                                                     | 7.31477   | 0.00004     |
| AJ002425     | HSAJ2425     | p65 protein                                                                                                | 8.11665   | 0.00002     |
| NM_006763    | BTG2         | BTG family, member 2                                                                                       | -7.82584  | 0.00003     |
| A_24_P118721 | A_24_P118721 | Unknown                                                                                                    | 9.15287   | 7.43754E-06 |
| NM_138763    | BAX          | BCL2-associated X protein                                                                                  | 9.65811   | 4.77628E-06 |
| NM_005819    | STX6         | Syntaxin 6                                                                                                 | 7.83975   | 0.00003     |
| NM_017730    | QRICH1       | Glutamine-rich 1                                                                                           | -10.66821 | 2.08332E-06 |
| NM_006827    | TMED10       | Transmembrane emp24-like trafficking protein 10 (yeast)                                                    | 7.98498   | 0.00002     |
| NM_012118    | CCR4L        | CCR4 carbon catabolite repression 4-like (S. cerevisiae)                                                   | 7.30251   | 0.00005     |
| NM_033532    | CDC2L2       | Cell division cycle 2-like 2 (PITSLRE proteins)                                                            | 6.8601    | 0.00007     |

|                 |                 |                                                                                                                                                          |           |             |
|-----------------|-----------------|----------------------------------------------------------------------------------------------------------------------------------------------------------|-----------|-------------|
| NM_177966       | 2'-PDE          | 2'-phosphodiesterase                                                                                                                                     | 8.47363   | 0.00001     |
| NM_002103       | GYS1            | Glycogen synthase 1 (muscle)                                                                                                                             | -8.92352  | 9.15489E-06 |
| NM_182547       | TMED4           | DEAD (Asp-Glu-Ala-Asp) box polypeptide 56                                                                                                                | 7.46187   | 0.00004     |
| NM_021149       | COTL1           | Coactosin-like 1 (Dictyostelium)                                                                                                                         | -7.01049  | 0.00006     |
| NM_002145       | HOXB2           | Homeobox B2                                                                                                                                              | 8.19278   | 0.00002     |
| NM_001002909    | GPATCH8         | G patch domain containing 8                                                                                                                              | -9.04408  | 8.20341E-06 |
| NM_021649       | TICAM2          | Toll-like receptor adaptor molecule 2                                                                                                                    | 6.59711   | 0.0001      |
| NM_022558       | GH2             | Chorionic somatomammotropin hormone 1 (placental lactogen)                                                                                               | 8.05993   | 0.00002     |
| NM_194247       | HNRPA3          | Heterogeneous nuclear ribonucleoprotein A3                                                                                                               | 7.43335   | 0.00004     |
| NM_014153       | ZC3H7A          | Zinc finger CCCH-type containing 7A                                                                                                                      | 7.05942   | 0.00006     |
| NM_153045       | C9orf91         | Chromosome 9 open reading frame 91                                                                                                                       | -7.73743  | 0.00003     |
| ENST00000312847 | ENST00000312847 | Unknown                                                                                                                                                  | 6.86646   | 0.00007     |
| NM_018013       | FLJ10159        | hypothetical protein FLJ10159                                                                                                                            | -7.60685  | 0.00003     |
| X16323          | HGF             | Human mRNA for hepatocyte growth factor (HGF).                                                                                                           | 9.5554    | 5.21792E-06 |
| A_32_P331700    | A_32_P331700    | Unknown                                                                                                                                                  | 6.7671    | 0.00008     |
| AK095600        | ZNF709          | Homo sapiens cDNA FLJ38281 fis, clone FCBBF3005729, moderately similar to Homo sapiens GIOT-4 mRNA for gonadotropin inducible transcription repressor-4. | -7.53387  | 0.00004     |
| NM_001031628    | LOC57228        | small trans-membrane and glycosylated protein                                                                                                            | 10.54713  | 2.29279E-06 |
| NM_015001       | SPEN            | Spen homolog, transcriptional regulator (Drosophila)                                                                                                     | -10.27584 | 2.85175E-06 |
| NM_002229       | JUNB            | Jun B proto-oncogene                                                                                                                                     | 12.09317  | 7.20878E-07 |
| BX647217        | HNRPA3          | Heterogeneous nuclear ribonucleoprotein A3                                                                                                               | 8.416     | 0.00001     |
| NM_014384       | ACAD8           | Acyl-Coenzyme A dehydrogenase family, member 8                                                                                                           | -7.18087  | 0.00005     |
| NM_138575       | PGAM5           | Phosphoglycerate mutase family member 5                                                                                                                  | 7.49043   | 0.00004     |
| NM_003884       | PCAF            | P300/CBP-associated factor                                                                                                                               | -8.25455  | 0.00002     |
| AK122976        | ZNF275          | Zinc finger protein 275                                                                                                                                  | -8.96519  | 8.81293E-06 |
| NM_017911       | FAM118A         | Family with sequence similarity 118, member A                                                                                                            | 11.18404  | 1.39951E-06 |
| NM_003791       | MBTPS1          | Membrane-bound transcription factor peptidase, site 1                                                                                                    | -11.73778 | 9.29231E-07 |
| AK096643        | FLJ22184        | hypothetical protein FLJ22184                                                                                                                            | 10.23909  | 2.9384E-06  |
| NM_017651       | AHI1            | Abelson helper integration site 1                                                                                                                        | -8.65797  | 0.00001     |
| NM_002541       | OGDH            | Oxoglutarate (alpha-ketoglutarate) dehydrogenase (lipoamide)                                                                                             | 7.30081   | 0.00005     |
| NM_005561       | LAMP1           | Lysosomal-associated membrane protein 1                                                                                                                  | 7.79006   | 0.00003     |
| NM_015476       | C18orf10        | Chromosome 18 open reading frame 10                                                                                                                      | 7.4762    | 0.00004     |
| NM_006380       | APPBP2          | Amyloid beta precursor protein (cytoplasmic tail) binding protein 2                                                                                      | 8.89445   | 9.40209E-06 |
| BC007879        | FAM120A         | Family with sequence similarity 120A                                                                                                                     | 7.06812   | 0.00006     |
| NM_018221       | MOBK1B          | MOB1, Mps One Binder kinase activator-like 1B (yeast)                                                                                                    | 7.46482   | 0.00004     |
| NM_147148       | GSTM4           | Glutathione S-transferase M4                                                                                                                             | 8.61646   | 0.00001     |
| AA451906        | BIN1            | Bridging integrator 1                                                                                                                                    | 7.4277    | 0.00004     |
| NM_032383       | HPS3            | Hermansky-Pudlak syndrome 3                                                                                                                              | -6.97134  | 0.00007     |
| A_24_P808838    | A_24_P808838    | Unknown                                                                                                                                                  | 6.73859   | 0.00008     |
| NM_001042537    | SLC9A6          | Solute carrier family 9 (sodium/hydrogen exchanger), member 6                                                                                            | -7.75826  | 0.00003     |
| NM_031434       | TMUB1           | Transmembrane and ubiquitin-like domain containing 1                                                                                                     | 12.22266  | 6.5827E-07  |
| AB020648        | KIAA0841        | KIAA0841                                                                                                                                                 | -8.89967  | 9.35718E-06 |
| NM_015120       | ALMS1           | Alstrom syndrome 1                                                                                                                                       | -8.99658  | 8.5646E-06  |
| NM_015401       | HDAC7A          | Histone deacetylase 7A                                                                                                                                   | -6.57001  | 0.0001      |
| NM_000189       | HK2             | Hexokinase 2                                                                                                                                             | 6.72803   | 0.00009     |
| NM_021149       | COTL1           | Coactosin-like 1 (Dictyostelium)                                                                                                                         | -6.86527  | 0.00007     |
| CR603450        | TRIM52          | Tripartite motif-containing 52                                                                                                                           | -7.76938  | 0.00003     |
| NM_175863       | ARID1B          | AT rich interactive domain 1B (SWI1-like)                                                                                                                | 12.1051   | 7.14841E-07 |
| THC2295157      | THC2295157      | Unknown                                                                                                                                                  | -7.06649  | 0.00006     |
| AJ008005        | PSEN1           | Presenilin 1 (Alzheimer disease 3)                                                                                                                       | 9.19485   | 7.16338E-06 |
| NM_007326       | CYB5R3          | Cytochrome b5 reductase 3                                                                                                                                | 6.89825   | 0.00007     |
| AK096104        | LOC727820       | hypothetical protein LOC727820                                                                                                                           | -9.71542  | 4.54783E-06 |
| NM_000319       | PEX5            | Peroxisomal biogenesis factor 5                                                                                                                          | 10.03095  | 3.48736E-06 |
| BF895757        | TRIM28          | Tripartite motif-containing 28                                                                                                                           | 6.34251   | 0.00013     |
| BM509577        | THC2281731      | Transcribed locus, strongly similar to XP_001152474.1 hypothetical protein [Pan troglodytes]                                                             | 10.69767  | 2.03562E-06 |
| NM_021188       | ZNF410          | Zinc finger protein 410                                                                                                                                  | -12.20709 | 6.65471E-07 |
| NM_001681       | ATP2A2          | ATPase, Ca++ transporting, cardiac muscle, slow twitch 2                                                                                                 | 6.35897   | 0.00013     |
| THC2377679      | THC2377679      | Unknown                                                                                                                                                  | -10.62465 | 2.15615E-06 |
| NM_198494       | ZNF642          | Zinc finger protein 642                                                                                                                                  | -7.31971  | 0.00004     |
| NM_017706       | WDR55           | WD repeat domain 55                                                                                                                                      | 7.59863   | 0.00003     |

|                 |                 |                                                                                                                                                      |           |             |
|-----------------|-----------------|------------------------------------------------------------------------------------------------------------------------------------------------------|-----------|-------------|
| NM_024757       | EHMT1           | Euchromatic histone-lysine N-methyltransferase 1                                                                                                     | 8.32535   | 0.00002     |
| A_24_P340966    | A_24_P340966    | Unknown                                                                                                                                              | 7.90415   | 0.00002     |
| ENST00000380831 | ENST00000380831 | LPXK_RHIME (Q92RP7) Tetraacyldisaccharide 4'-kinase (Lipid A 4'-kinase) , partial (5%) [THC2374771]                                                  | -6.42385  | 0.00012     |
| NM_013446       | MKRN1           | Makorin, ring finger protein, 1                                                                                                                      | -6.90506  | 0.00007     |
| XM_928285       | ENST00000375923 | PREDICTED: Homo sapiens similar to protein expressed in prostate, ovary, testis, and placenta 15, transcript variant 1 (LOC653239), mRNA [XM_928285] | 6.42221   | 0.00012     |
| BX648945        | EYA3            | Eyes absent homolog 3 (Drosophila)                                                                                                                   | -8.35174  | 0.00002     |
| NM_152367       | C1orf161        | Chromosome 1 open reading frame 161                                                                                                                  | 8.07991   | 0.00002     |
| NM_015361       | R3HDM1          | R3H domain containing 1                                                                                                                              | -8.80786  | 0.00001     |
| NM_152896       | UHRF2           | Ubiquitin-like, containing PHD and RING finger domains, 2                                                                                            | -6.81973  | 0.00008     |
| NM_001001396    | ATP2B4          | ATPase, Ca++ transporting, plasma membrane 4                                                                                                         | -6.32724  | 0.00014     |
| NM_020847       | TNRC6A          | Homo sapiens trinucleotide repeat containing 6A (TNRC6A), mRNA.                                                                                      | 7.32895   | 0.00004     |
| AK074590        | SFRS16          | Splicing factor, arginine/serine-rich 16                                                                                                             | 8.55204   | 0.00001     |
| NM_001018052    | POLR3H          | Polymerase (RNA) III (DNA directed) polypeptide H (22.9kD)                                                                                           | 6.76245   | 0.00008     |
| NM_012256       | ZNF212          | Zinc finger protein 398                                                                                                                              | -7.93151  | 0.00002     |
| NM_004850       | ROCK2           | Rho-associated, coiled-coil containing protein kinase 2                                                                                              | -8.12669  | 0.00002     |
| NM_053041       | COMM7           | COMM domain containing 7                                                                                                                             | 6.43078   | 0.00012     |
| NM_015382       | HECTD1          | HECT domain containing 1                                                                                                                             | -9.02879  | 8.3178E-06  |
| NM_033116       | NEK9            | NIMA (never in mitosis gene a)- related kinase 9                                                                                                     | 6.35421   | 0.00013     |
| NM_002886       | RAP2B           | RAP2B, member of RAS oncogene family                                                                                                                 | 9.69267   | 4.63706E-06 |
| NM_014846       | KIAA0196        | KIAA0196                                                                                                                                             | -6.66666  | 0.00009     |
| NM_022658       | HOXC8           | Homeobox C4                                                                                                                                          | 6.23915   | 0.00015     |
| NM_004788       | UBE4A           | Ubiquitination factor E4A (UFD2 homolog, yeast)                                                                                                      | -7.44899  | 0.00004     |
| NM_022776       | OSBPL11         | Oxysterol binding protein-like 11                                                                                                                    | -7.44389  | 0.00004     |
| BC018035        | IMP5            | intramembrane protease 5                                                                                                                             | 10.04526  | 3.4462E-06  |
| NM_001007559    | SS18            | Synovial sarcoma translocation, chromosome 18                                                                                                        | 13.94595  | 2.12052E-07 |
| AK000675        | 1-Mar           | Membrane-associated ring finger (C3HC4) 1                                                                                                            | -6.55294  | 0.0001      |
| NM_004710       | SYNGR2          | Synaptogyrin 2                                                                                                                                       | 6.65626   | 0.00009     |
| NM_014749       | KIAA0586        | KIAA0586                                                                                                                                             | -6.46727  | 0.00012     |
| NM_014925       | R3HDM2          | Homo sapiens R3H domain containing 2 (R3HDM2), mRNA.                                                                                                 | -8.92219  | 9.16608E-06 |
| NM_030567       | PRR7            | Proline rich 7 (synaptic)                                                                                                                            | 7.36757   | 0.00004     |
| NM_173514       | FLJ90709        | hypothetical protein FLJ90709                                                                                                                        | -7.07812  | 0.00006     |
| NM_144653       | BTBD14A         | BTB (POZ) domain containing 14A                                                                                                                      | 9.27991   | 6.64126E-06 |
| BC063441        | BC063441        | Homo sapiens cDNA clone IMAGE:5527329, partial cds.                                                                                                  | 7.14285   | 0.00005     |
| NM_000379       | XDH             | Xanthine dehydrogenase                                                                                                                               | 6.77939   | 0.00008     |
| BX648958        | BX648958        | Shinc-4 mRNA, partial sequence                                                                                                                       | -8.74774  | 0.00001     |
| NM_007275       | TUSC2           | Tumor suppressor candidate 2                                                                                                                         | 8.78322   | 0.00001     |
| NM_005487       | HMG2L1          | High-mobility group protein 2-like 1                                                                                                                 | -7.02563  | 0.00006     |
| NM_020245       | TULP4           | Tubby like protein 4                                                                                                                                 | -8.25514  | 0.00002     |
| NM_032788       | ZNF514          | Mitochondrial ribosomal protein S5                                                                                                                   | -8.39584  | 0.00002     |
| ENST00000331736 | ENST00000331736 | Q8NH99 (Q8NH99) Seven transmembrane helix receptor, partial (77%) [THC2437350]                                                                       | 8.07755   | 0.00002     |
| NM_182314       | COVA1           | Cytosolic ovarian carcinoma antigen 1                                                                                                                | -10.02086 | 3.51669E-06 |
| NM_015330       | SPECC1L         | SPECC1-like                                                                                                                                          | -9.41199  | 5.91167E-06 |
| NM_014649       | SAFB2           | Small nuclear ribonucleoprotein polypeptide E                                                                                                        | 7.43943   | 0.00004     |
| NM_007253       | CYP4F8          | Cytochrome P450, family 4, subfamily F, polypeptide 8                                                                                                | 8.22057   | 0.00002     |
| AK130071        | ZBTB44          | Zinc finger and BTB domain containing 44                                                                                                             | -6.57362  | 0.0001      |
| NM_145006       | SUSD3           | Sushi domain containing 3                                                                                                                            | -7.18067  | 0.00005     |
| NM_001394       | DUSP4           | Dual specificity phosphatase 4                                                                                                                       | 7.89185   | 0.00002     |
| NM_007175       | SPFH2           | SPFH domain family, member 2                                                                                                                         | -8.77846  | 0.00001     |
| NM_080611       | DUSP15          | Dual specificity phosphatase 15                                                                                                                      | 6.86459   | 0.00007     |
| NM_033296       | MRFAP1          | Mof4 family associated protein 1                                                                                                                     | 7.20985   | 0.00005     |
| NM_006037       | HDAC4           | Histone deacetylase 4                                                                                                                                | 6.91398   | 0.00007     |
| NM_001033858    | DCLRE1C         | DNA cross-link repair 1C (PSO2 homolog, S. cerevisiae)                                                                                               | -6.19183  | 0.00016     |
| NM_012181       | FKBP8           | FK506 binding protein 8, 38kDa                                                                                                                       | 10.34449  | 2.69733E-06 |
| AK055921        | MST101          | MSTP101                                                                                                                                              | -10.08009 | 3.34822E-06 |
| AK057884        | COG3            | Component of oligomeric golgi complex 3                                                                                                              | 6.83815   | 0.00008     |
| NM_015448       | RP11-529110.4   | deleted in a mouse model of primary ciliary dyskinesia                                                                                               | 7.35999   | 0.00004     |
| NM_205861       | DHDDS           | Dehydrodolichyl diphosphate synthase                                                                                                                 | 9.46651   | 5.63664E-06 |
| NM_003255       | TIMP2           | TIMP metalloproteinase inhibitor 2                                                                                                                   | 9.53344   | 5.31808E-06 |
| AJ420589        | FAM120B         | Family with sequence similarity 120B                                                                                                                 | -8.32685  | 0.00002     |

|              |              |                                                                                                                      |           |             |
|--------------|--------------|----------------------------------------------------------------------------------------------------------------------|-----------|-------------|
| NM_017851    | PARP16       | Poly (ADP-ribose) polymerase family, member 16                                                                       | -8.30035  | 0.00002     |
| NM_001002021 | PFKL         | Phosphofructokinase, liver                                                                                           | 6.55024   | 0.00011     |
| NM_004491    | GRLF1        | Glucocorticoid receptor DNA binding factor 1                                                                         | 6.56125   | 0.0001      |
| NM_022457    | RFWD2        | Ring finger and WD repeat domain 2                                                                                   | -6.49304  | 0.00011     |
| NM_006555    | YKT6         | YKT6 v-SNARE homolog (S. cerevisiae)                                                                                 | 6.62617   | 0.0001      |
| NM_018452    | C6orf35      | Chromosome 6 open reading frame 35                                                                                   | 6.82308   | 0.00008     |
| NM_006464    | TGOLN2       | Trans-golgi network protein 2                                                                                        | -7.19236  | 0.00005     |
| NM_002860    | ALDH18A1     | Aldehyde dehydrogenase 18 family, member A1                                                                          | -10.20157 | 3.02985E-06 |
| NM_145232    | ATPBD3       | ATP binding domain 3                                                                                                 | 6.34185   | 0.00013     |
| NM_001233    | CAV2         | Caveolin 2                                                                                                           | 10.02277  | 3.51112E-06 |
| A_24_P322908 | A_24_P322908 | Unknown                                                                                                              | -7.38585  | 0.00004     |
| NM_139246    | C9orf97      | Chromosome 9 open reading frame 97                                                                                   | 7.67513   | 0.00003     |
| NM_025154    | UNC84A       | Unc-84 homolog A (C. elegans)                                                                                        | -7.71957  | 0.00003     |
| NM_015655    | ZNF337       | Zinc finger protein 337                                                                                              | -6.34247  | 0.00013     |
| NM_033083    | EAF1         | ELL associated factor 1                                                                                              | 6.56433   | 0.0001      |
| NM_021096    | CACNA1I      | Calcium channel, voltage-dependent, alpha 1I subunit                                                                 | 8.34352   | 0.00002     |
| NM_014423    | AFF4         | AF4/FMR2 family, member 4                                                                                            | -6.759    | 0.00008     |
| BC010538     | C18orf18     | Hypothetical protein LOC339290                                                                                       | -7.97833  | 0.00002     |
| NM_002541    | OGDH         | Oxoglutarate (alpha-ketoglutarate) dehydrogenase (lipoamide)                                                         | 8.14865   | 0.00002     |
| NM_174887    | IFT20        | Intraflagellar transport 20 homolog (Chlamydomonas)                                                                  | 9.26877   | 6.70721E-06 |
| XM_936535    | NDOR1        | PREDICTED: Homo sapiens hypothetical protein LOC648245, transcript variant 1 (LOC648245), mRNA [XM_936535]           | 7.74239   | 0.00003     |
| NM_019896    | POLE4        | Polymerase (DNA-directed), epsilon 4 (p12 subunit)                                                                   | 8.36258   | 0.00002     |
| NM_016154    | RAB4B        | RAB4B, member RAS oncogene family                                                                                    | 6.27108   | 0.00015     |
| NM_033129    | SCRT2        | Scratch homolog 2, zinc finger protein (Drosophila)                                                                  | 6.66725   | 0.00009     |
| NM_001012614 | CTBP1        | C-terminal binding protein 1                                                                                         | 7.38024   | 0.00004     |
| BC045778     | XYLT1        | Xylosyltransferase I                                                                                                 | -6.16707  | 0.00017     |
| NM_012208    | HARSL        | Histidyl-tRNA synthetase-like                                                                                        | -8.54862  | 0.00001     |
| NM_014411    | NAG8         | nasopharyngeal carcinoma associated gene protein-8                                                                   | -6.87141  | 0.00007     |
| NM_022893    | BCL11A       | B-cell CLL/lymphoma 11A (zinc finger protein)                                                                        | -7.86838  | 0.00003     |
| NM_000019    | ACAT1        | Acetyl-Coenzyme A acetyltransferase 1 (acetoacetyl Coenzyme A thiolase)                                              | 6.17359   | 0.00016     |
| NM_014802    | KIAA0528     | KIAA0528                                                                                                             | -7.27048  | 0.00005     |
| NM_014912    | CPEB3        | Cytoplasmic polyadenylation element binding protein 3                                                                | -9.89204  | 3.91629E-06 |
| NM_152285    | ARRDC1       | Arrestin domain containing 1                                                                                         | 6.40343   | 0.00012     |
| NM_020438    | DOLPP1       | Dolichyl pyrophosphate phosphatase 1                                                                                 | 6.43503   | 0.00012     |
| AK090478     | TMC8         | Transmembrane channel-like 8                                                                                         | -7.59888  | 0.00003     |
| NM_014329    | EDC4         | Enhancer of mRNA decapping 4                                                                                         | 6.31661   | 0.00014     |
| NM_015229    | KIAA0664     | KIAA0664                                                                                                             | 6.8895    | 0.00007     |
| NM_018360    | CXorf15      | Chromosome X open reading frame 15                                                                                   | 9.35232   | 6.2297E-06  |
| AK026760     | C20orf119    | Chromosome 20 open reading frame 119                                                                                 | -7.30047  | 0.00005     |
| NM_048368    | CTDP1        | CTD (carboxy-terminal domain, RNA polymerase II, polypeptide A) phosphatase, subunit 1                               | 6.38575   | 0.00013     |
| NM_174891    | C14orf79     | Chromosome 14 open reading frame 79                                                                                  | 8.13124   | 0.00002     |
| AK056484     | LOC441204    | hypothetical locus LOC441204                                                                                         | 8.75709   | 0.00001     |
| NM_020711    | KIAA1189     | KIAA1189                                                                                                             | -7.43592  | 0.00004     |
| NM_024891    | FLJ11783     | hypothetical protein FLJ11783                                                                                        | -14.18157 | 1.83464E-07 |
| S72422       | DLSTP        | E2k=alpha-ketoglutarate dehydrogenase complex dihydrolipoyl succinyltransferase [human, fetal brain, mRNA, 2987 nt]. | 6.15369   | 0.00017     |
| AB018323     | JMJD2C       | Jumonji domain containing 2C                                                                                         | -7.69576  | 0.00003     |
| NM_006696    | BRD8         | Bromodomain containing 8                                                                                             | -8.73726  | 0.00001     |
| NM_177439    | FTSJ1        | FtsJ homolog 1 (E. coli)                                                                                             | 6.55266   | 0.0001      |
| THC2392085   | THC2392085   | Unknown                                                                                                              | -7.57601  | 0.00003     |
| NM_005645    | TAF13        | TAF13 RNA polymerase II, TATA box binding protein (TBP)-associated factor, 18kDa                                     | 6.49776   | 0.00011     |
| NM_182612    | PDDC1        | Parkinson disease 7 domain containing 1                                                                              | 10.24294  | 2.92916E-06 |
| NM_004284    | CHD1L        | Chromodomain helicase DNA binding protein 1-like                                                                     | -8.18555  | 0.00002     |
| NM_032354    | TMEM107      | Transmembrane protein 107                                                                                            | -9.96453  | 3.68563E-06 |
| NM_002182    | IL1RAP       | Interleukin 1 receptor accessory protein                                                                             | -6.23672  | 0.00015     |
| NM_001007071 | RPS6KB2      | Ribosomal protein S6 kinase, 70kDa, polypeptide 2                                                                    | 6.0887    | 0.00018     |
| NM_032349    | NUDT16L1     | Nudix (nucleoside diphosphate linked moiety X)-type motif 16-like 1                                                  | 6.94114   | 0.00007     |
| NM_017951    | SMPD4        | Sphingomyelin phosphodiesterase 4, neutral membrane (neutral sphingomyelinase-3)                                     | 5.9566    | 0.00021     |
| NM_032042    | C5orf21      | Chromosome 5 open reading frame 21                                                                                   | -5.99255  | 0.0002      |
| AI090937     | LOC729616    | hypothetical protein LOC729616                                                                                       | -7.02475  | 0.00006     |

|              |                 |                                                                                                                     |           |             |
|--------------|-----------------|---------------------------------------------------------------------------------------------------------------------|-----------|-------------|
| NM_022764    | MTHFSD          | Methenyltetrahydrofolate synthetase domain containing                                                               | -9.35301  | 6.22594E-06 |
| NM_001315    | MAPK14          | Mitogen-activated protein kinase 14                                                                                 | -9.49739  | 5.48709E-06 |
| NM_198867    | ALKBH6          | AlkB, alkylation repair homolog 6 (E. coli)                                                                         | 5.99375   | 0.0002      |
| NM_004155    | SERPINB9        | Serpin peptidase inhibitor, clade B (ovalbumin), member 9                                                           | 8.93566   | 9.05384E-06 |
| NM_198970    | AES             | Amino-terminal enhancer of split                                                                                    | 7.18158   | 0.00005     |
| NM_007353    | GNA12           | Guanine nucleotide binding protein (G protein) alpha 12                                                             | 7.51614   | 0.00004     |
| BC087847     | ENST00000322446 | CDNA clone IMAGE:30389268                                                                                           | 8.47062   | 0.00001     |
| NM_145869    | ANXA11          | Annexin A11                                                                                                         | -9.25282  | 6.80287E-06 |
| AB014574     | FKBP15          | FK506 binding protein 15, 133kDa                                                                                    | -13.99188 | 2.06113E-07 |
| NM_033426    | KIAA1737        | KIAA1737                                                                                                            | -7.68569  | 0.00003     |
| BQ425510     | ADNP            | Transcribed locus                                                                                                   | -8.23074  | 0.00002     |
| NM_016287    | HP1BP3          | Heterochromatin protein 1, binding protein 3                                                                        | 8.19698   | 0.00002     |
| NM_016255    | FAM8A1          | Family with sequence similarity 8, member A1                                                                        | -6.9287   | 0.00007     |
| NM_004637    | RAB7            | RAB7, member RAS oncogene family                                                                                    | 6.02105   | 0.0002      |
| NM_144982    | CCDC131         | Coiled-coil domain containing 131                                                                                   | -6.4492   | 0.00012     |
| THC2365247   | THC2365247      | Q6QAQ1 (Q6QAQ1) Cytoskeletal beta actin (Fragment), partial (76%) [THC2365247]                                      | 5.97469   | 0.00021     |
| NM_014719    | KIAA0738        | KIAA0738 gene product                                                                                               | -10.86208 | 1.79053E-06 |
| NM_016028    | SUV420H1        | Suppressor of variegation 4-20 homolog 1 (Drosophila)                                                               | 8.9239    | 9.15176E-06 |
| NM_033274    | ADAM19          | ADAM metallopeptidase domain 19 (meltrin beta)                                                                      | -7.76503  | 0.00003     |
| AF086790     | ACON            | Homo sapiens aconitase precursor (ACON) mRNA, nuclear gene encoding mitochondrial protein, partial cds.             | 11.59634  | 1.02999E-06 |
| NM_032236    | USP48           | Ubiquitin specific peptidase 48                                                                                     | -6.86748  | 0.00007     |
| NM_001125    | ADPRH           | ADP-ribosylarginine hydrolase                                                                                       | 6.64904   | 0.00009     |
| NM_178508    | C6orf1          | Chromosome 6 open reading frame 1                                                                                   | 8.21324   | 0.00002     |
| NM_015691    | WWC3            | WWC family member 3                                                                                                 | -9.22295  | 6.98604E-06 |
| NM_032353    | VPS25           | Vacuolar protein sorting 25 homolog (S. cerevisiae)                                                                 | 7.29826   | 0.00005     |
| NM_016372    | GPR175          | G protein-coupled receptor 175                                                                                      | 6.49813   | 0.00011     |
| AL359584     | BXDC5           | Brix domain containing 5                                                                                            | -6.78264  | 0.00008     |
| NM_001009955 | SSBP3           | Single stranded DNA binding protein 3                                                                               | 8.57491   | 0.00001     |
| NM_201649    | SLC6A9          | Solute carrier family 6 (neurotransmitter transporter, glycine), member 9                                           | 7.77425   | 0.00003     |
| AB075502     | C6orf62         | Chromosome 6 open reading frame 62                                                                                  | -6.64251  | 0.00009     |
| NM_173587    | RCOR2           | REST corepressor 2                                                                                                  | 7.89684   | 0.00002     |
| NM_001006634 | ARHGAP17        | Rho GTPase activating protein 17                                                                                    | -9.86551  | 4.00466E-06 |
| NM_003656    | CAMK1           | Calcium/calmodulin-dependent protein kinase I                                                                       | 7.09836   | 0.00006     |
| NM_017640    | LRRC16          | Leucine rich repeat containing 16                                                                                   | -6.80494  | 0.00008     |
| CB987747     | CB987747        | Transcribed locus                                                                                                   | -7.90385  | 0.00002     |
| NM_052957    | ACRC            | Acidic repeat containing                                                                                            | -7.3354   | 0.00004     |
| NM_005634    | SOX3            | SRY (sex determining region Y)-box 3                                                                                | 8.01509   | 0.00002     |
| NM_138348    | FAM105B         | Family with sequence similarity 105, member B                                                                       | 7.37875   | 0.00004     |
| NM_017813    | IMPAD1          | Inositol monophosphatase domain containing 1                                                                        | 7.59455   | 0.00003     |
| NM_030576    | LIMD2           | LIM domain containing 2                                                                                             | 12.89038  | 4.17569E-07 |
| NM_000466    | PEX1            | Peroxisome biogenesis factor 1                                                                                      | -10.02315 | 3.51001E-06 |
| NM_001521    | GTF3C2          | General transcription factor IIIC, polypeptide 2, beta 110kDa                                                       | 8.99983   | 8.5394E-06  |
| AK125038     | KIAA0500        | KIAA0500 protein                                                                                                    | -5.89084  | 0.00023     |
| NM_015367    | BCL2L13         | BCL2-like 13 (apoptosis facilitator)                                                                                | 6.02735   | 0.0002      |
| NM_015635    | GAPVD1          | GTPase activating protein and VPS9 domains 1                                                                        | 6.35776   | 0.00013     |
| NM_201589    | MAFA            | V-maf musculoaponeurotic fibrosarcoma oncogene homolog A (avian)                                                    | 7.51391   | 0.00004     |
| NM_017742    | ZCCHC2          | Zinc finger, CCHC domain containing 2                                                                               | -6.89791  | 0.00007     |
| NM_015138    | RTF1            | Rtf1, Paf1/RNA polymerase II complex component, homolog (S. cerevisiae)                                             | -7.75704  | 0.00003     |
| NM_030802    | FAM117A         | Family with sequence similarity 117, member A                                                                       | -6.45889  | 0.00012     |
| NM_017580    | ZRANB1          | Zinc finger, RAN-binding domain containing 1                                                                        | 7.16513   | 0.00005     |
| CR624826     | WASF2           | CDNA clone IMAGE:3030163                                                                                            | -7.8809   | 0.00002     |
| NM_004310    | RHOH            | Ras homolog gene family, member H                                                                                   | -8.98267  | 8.67368E-06 |
| NM_014827    | ZC3H11A         | Zinc finger CCCH-type containing 11A                                                                                | -9.52615  | 5.35178E-06 |
| NM_021960    | MCL1            | Myeloid cell leukemia sequence 1 (BCL2-related)                                                                     | -9.30554  | 6.4923E-06  |
| THC2275506   | THC2275506      | ALU4_HUMAN (P39191) Alu subfamily SB2 sequence contamination warning entry, partial (24%) [THC2275506]              | -7.19705  | 0.00005     |
| NM_022066    | UBE2O           | Ubiquitin-conjugating enzyme E2O                                                                                    | -8.02194  | 0.00002     |
| NM_015100    | POGZ            | Pogo transposable element with ZNF domain                                                                           | -9.44018  | 5.76767E-06 |
| NM_032982    | CASP2           | Caspase 2, apoptosis-related cysteine peptidase (neural precursor cell expressed, developmentally down-regulated 2) | -6.4344   | 0.00012     |
| NM_015568    | PPP1R16B        | Protein phosphatase 1, regulatory (inhibitor) subunit 16B                                                           | 6.70901   | 0.00009     |



|                 |                 |                                                                                                  |           |             |
|-----------------|-----------------|--------------------------------------------------------------------------------------------------|-----------|-------------|
| NM_001017992    | DKFZp686D0972   | similar to RIKEN cDNA 4732495G21 gene                                                            | 7.41188   | 0.00004     |
| NM_002073       | GNAZ            | Guanine nucleotide binding protein (G protein), alpha z polypeptide                              | 8.64948   | 0.00001     |
| A_24_P264416    | A_24_P264416    | Unknown                                                                                          | 6.15843   | 0.00017     |
| NM_152682       | RWDD4A          | RWD domain containing 4A                                                                         | -7.11982  | 0.00006     |
| NM_024833       | ZNF671          | Zinc finger protein 671                                                                          | -8.82104  | 0.00001     |
| A_24_P410070    | A_24_P410070    | Unknown                                                                                          | -7.09055  | 0.00006     |
| NM_018210       | FLJ10769        | hypothetical protein FLJ10769                                                                    | -10.36037 | 2.66292E-06 |
| NM_003194       | TBP             | TATA box binding protein                                                                         | -7.06616  | 0.00006     |
| THC2306239      | THC2306239      | HUMPKD1G08 polycystic kidney disease 1 protein {Homo sapiens;} , partial (12%) [THC2306239]      | 6.39854   | 0.00013     |
| NM_021158       | TRIB3           | Tribbles homolog 3 (Drosophila)                                                                  | 6.25082   | 0.00015     |
| NM_020771       | HACE1           | HECT domain and ankyrin repeat containing, E3 ubiquitin protein ligase 1                         | -6.76349  | 0.00008     |
| NM_030939       | C6orf62         | Chromosome 6 open reading frame 62                                                               | -6.49244  | 0.00011     |
| ENST00000357697 | ENST00000357697 | Unknown                                                                                          | 7.83769   | 0.00003     |
| NM_021145       | DMTF1           | Cyclin D binding myb-like transcription factor 1                                                 | -7.75897  | 0.00003     |
| NM_014912       | CPEB3           | Cytoplasmic polyadenylation element binding protein 3                                            | -8.90297  | 9.32893E-06 |
| NM_030569       | ITIH5           | Inter-alpha (globulin) inhibitor H5                                                              | 9.22611   | 6.96638E-06 |
| NM_031858       | NBR1            | Neighbor of BRCA1 gene 1                                                                         | -11.10553 | 1.48531E-06 |
| NM_024050       | C19orf58        | Chromosome 19 open reading frame 58                                                              | 7.04054   | 0.00006     |
| NM_014943       | ZHX2            | Zinc fingers and homeoboxes 2                                                                    | -8.10382  | 0.00002     |
| NM_173728       | ARHGEF15        | Rho guanine nucleotide exchange factor (GEF) 15                                                  | 6.53943   | 0.00011     |
| NM_014710       | GPRASP1         | G protein-coupled receptor associated sorting protein 2                                          | -6.26554  | 0.00015     |
| NM_024580       | EFTUD1          | Elongation factor Tu GTP binding domain containing 1                                             | -6.34432  | 0.00013     |
| AK127374        | AK127374        | CDNA FLJ45450 fis, clone BRSTN2002691                                                            | -8.71223  | 0.00001     |
| BC062753        | MCART1          | Mitochondrial carrier triple repeat 1                                                            | -9.73391  | 4.47672E-06 |
| NM_003640       | IKBKAP          | Inhibitor of kappa light polypeptide gene enhancer in B-cells, kinase complex-associated protein | -7.39824  | 0.00004     |
| NM_007375       | TARDBP          | TAR DNA binding protein                                                                          | -6.66957  | 0.00009     |
| CR594281        | METTL3          | Methyltransferase like 3                                                                         | -8.80668  | 0.00001     |
| NM_002014       | FKBP4           | FK506 binding protein 4, 59kDa                                                                   | 6.81268   | 0.00008     |
| NM_145279       | MOBK12C         | MOB1, Mps One Binder kinase activator-like 2C (yeast)                                            | 10.59534  | 2.20673E-06 |
| BC043212        | EFHB            | EF-hand domain family, member B                                                                  | 6.97051   | 0.00007     |
| NM_003146       | SSRP1           | Structure specific recognition protein 1                                                         | -6.13864  | 0.00017     |
| NM_015107       | PHF8            | PHD finger protein 8                                                                             | -7.1863   | 0.00005     |
| BC051311        | DKFZp547E087    | hypothetical gene LOC283846                                                                      | 9.24017   | 6.87976E-06 |
| NM_018688       | BIN3            | Bridging integrator 3                                                                            | 5.69995   | 0.00029     |
| NM_024620       | ZNF329          | Zinc finger protein 329                                                                          | -7.79871  | 0.00003     |
| NM_015001       | SPEN            | Spen homolog, transcriptional regulator (Drosophila)                                             | -8.49844  | 0.00001     |
| NM_014659       | HISPPD2A        | Histidine acid phosphatase domain containing 2A                                                  | -6.14796  | 0.00017     |
| NM_016598       | ZDHHC3          | Zinc finger, DHHC-type containing 3                                                              | 6.91463   | 0.00007     |
| NM_018353       | C14orf106       | Chromosome 14 open reading frame 106                                                             | -6.98428  | 0.00006     |
| NM_006861       | RAB35           | RAB35, member RAS oncogene family                                                                | 11.1048   | 1.48613E-06 |
| NM_018474       | C20orf19        | Homo sapiens chromosome 20 open reading frame 19 (C20orf19), mRNA.                               | -6.2157   | 0.00016     |
| AB037855        | KIAA1434        | hypothetical protein KIAA1434                                                                    | -7.0343   | 0.00006     |
| AL834448        | DKFZp547C195    | hypothetical protein DKFZp547C195                                                                | -11.98823 | 7.7645E-07  |
| NM_004629       | FANCG           | Fanconi anemia, complementation group G                                                          | -6.22857  | 0.00015     |
| NM_033089       | ZCCHC3          | Zinc finger, CCHC domain containing 3                                                            | -6.36039  | 0.00013     |
| THC2301362      | THC2301362      | Unknown                                                                                          | -7.58392  | 0.00003     |
| AK026896        | STK24           | Serine/threonine kinase 24 (STE20 homolog, yeast)                                                | -5.95955  | 0.00021     |
| NM_032438       | L3MBTL3         | L(3)mbt-like 3 (Drosophila)                                                                      | -6.4802   | 0.00011     |
| THC2378263      | THC2378263      | Unknown                                                                                          | -6.63826  | 0.0001      |
| NM_032560       | SMEK1           | SMEK homolog 1, suppressor of mek1 (Dictyostelium)                                               | -7.87743  | 0.00003     |
| NM_030915       | LBH             | Limb bud and heart development homolog (mouse)                                                   | 8.06636   | 0.00002     |
| NM_004364       | CEBPA           | CCAAT/enhancer binding protein (C/EBP), alpha                                                    | 9.5187    | 5.3865E-06  |
| NM_006278       | ST3GAL4         | ST3 beta-galactoside alpha-2,3-sialyltransferase 4                                               | 5.76877   | 0.00027     |
| NM_018996       | TNRC6C          | Trinucleotide repeat containing 6C                                                               | 6.87855   | 0.00007     |
| NM_016479       | SCOTIN          | scotin                                                                                           | -10.49939 | 2.38168E-06 |
| NM_019555       | ARHGEF3         | Rho guanine nucleotide exchange factor (GEF) 3                                                   | -10.73596 | 1.9754E-06  |
| NM_207660       | ZC3H14          | Zinc finger CCCH-type containing 14                                                              | 8.23037   | 0.00002     |
| AY726570        | ENST00000367696 | Clone TESTIS-724 mRNA sequence                                                                   | -6.55525  | 0.0001      |
| NM_012239       | SIRT3           | Sirtuin (silent mating type information regulation 2 homolog) 3 (S. cerevisiae)                  | -7.27221  | 0.00005     |

|              |                 |                                                                     |           |             |
|--------------|-----------------|---------------------------------------------------------------------|-----------|-------------|
| NM_139321    | ATRN            | Attractin                                                           | -11.14924 | 1.43685E-06 |
| NM_006868    | RAB31           | RAB31, member RAS oncogene family                                   | -8.70562  | 0.00001     |
| NM_003730    | RNASET2         | Ribonuclease T2                                                     | -6.26012  | 0.00015     |
| BC045677     | FAM123A         | Family with sequence similarity 123A                                | 7.88642   | 0.00002     |
| NM_005626    | SFRS4           | Splicing factor, arginine/serine-rich 4                             | 6.47874   | 0.00011     |
| NM_003510    | HIST1H2AK       | Histone cluster 1, H2ak                                             | 6.79094   | 0.00008     |
| NM_006814    | PSMF1           | Proteasome (prosome, macropain) inhibitor subunit 1 (PI31)          | -6.85967  | 0.00007     |
| NR_002939    | RUNDC2C         | Homo sapiens RUN domain containing 2C (RUNDC2C) on chromosome 16.   | 10.2493   | 2.91402E-06 |
| NM_005946    | MT1A            | Metallothionein 1A (functional)                                     | 5.81991   | 0.00025     |
| NM_145698    | ACBD5           | Acyl-Coenzyme A binding domain containing 5                         | 8.7742    | 0.00001     |
| AY629351     | ZCCHC4          | Zinc finger, CCHC domain containing 4                               | 7.46566   | 0.00004     |
| NM_145071    | CISH            | Cytokine inducible SH2-containing protein                           | 6.338     | 0.00013     |
| NM_016072    | GOLT1B          | Golgi transport 1 homolog B (S. cerevisiae)                         | 8.13565   | 0.00002     |
| AK056744     | VPS13C          | Vacuolar protein sorting 13 homolog C (S. cerevisiae)               | -6.21249  | 0.00016     |
| AF174606     | SHFM3P1         | Breakpoint cluster region                                           | 6.2552    | 0.00015     |
| NM_023923    | PHACTR4         | Phosphatase and actin regulator 4                                   | -9.54987  | 5.24294E-06 |
| CR591805     | TMEM183A        | Chromosome 1 open reading frame 37                                  | -7.74218  | 0.00003     |
| AY163812     | C17orf80        | Chromosome 17 open reading frame 80                                 | -6.70328  | 0.00009     |
| NM_001127    | AP1B1           | Adaptor-related protein complex 1, beta 1 subunit                   | 6.3445    | 0.00013     |
| AK024489     | PPP1R3E         | Protein phosphatase 1, regulatory (inhibitor) subunit 3E            | -5.77543  | 0.00027     |
| NM_014827    | ZC3H11A         | Zinc finger CCCH-type containing 11A                                | -9.04607  | 8.18865E-06 |
| NM_020651    | PEL11           | Pellino homolog 1 (Drosophila)                                      | -10.29063 | 2.81767E-06 |
| NM_001004351 | MGC57359        | similar to Williams Beuren syndrome chromosome region 19            | 9.7492    | 4.41886E-06 |
| A_23_P140454 | A_23_P140454    | Unknown                                                             | 7.70324   | 0.00003     |
| NM_021639    | GPBP1L1         | GC-rich promoter binding protein 1-like 1                           | -9.69439  | 4.63023E-06 |
| THC2437906   | THC2437906      | Unknown                                                             | -7.29071  | 0.00005     |
| NM_014751    | MTSS1           | Metastasis suppressor 1                                             | -6.83835  | 0.00008     |
| THC2274685   | THC2274685      | AF326941 5H1 {Caenorhabditis elegans;} , partial (16%) [THC2274685] | -5.8588   | 0.00024     |
| NM_006994    | BTN3A3          | Butyrophilin, subfamily 3, member A3                                | -6.7053   | 0.00009     |
| NM_194302    | CCDC108         | Coiled-coil domain containing 108                                   | 8.27613   | 0.00002     |
| NM_018475    | TMEM165         | Transmembrane protein 165                                           | 6.52923   | 0.00011     |
| NM_018355    | ZNF415          | Zinc finger protein 415                                             | -6.32122  | 0.00014     |
| AW948903     | ELK3            | ELK3, ETS-domain protein (SRF accessory protein 2)                  | 10.10496  | 3.28015E-06 |
| NM_017733    | PIGG            | Phosphatidylinositol glycan anchor biosynthesis, class G            | -8.82095  | 0.00001     |
| NM_013433    | TNPO2           | Transportin 2 (importin 3, karyopherin beta 2b)                     | 5.7888    | 0.00026     |
| NM_003379    | VIL2            | Villin 2 (ezrin)                                                    | 7.14114   | 0.00005     |
| AK093641     | FAM120AOS       | Family with sequence similarity 120A opposite strand                | -8.05047  | 0.00002     |
| NM_023015    | INTS3           | Integrator complex subunit 3                                        | -6.0334   | 0.00019     |
| NM_002017    | FLI1            | Friend leukemia virus integration 1                                 | -6.68628  | 0.00009     |
| NM_145808    | MTPN            | Myotrophin                                                          | 8.14242   | 0.00002     |
| A_24_P118591 | A_24_P118591    | Unknown                                                             | -7.11249  | 0.00006     |
| BG620990     | LOC339352       | similar to ATP binding domain 3                                     | 5.91871   | 0.00022     |
| NM_002862    | PYGB            | Phosphorylase, glycogen; brain                                      | 6.26247   | 0.00015     |
| XM_291857    | A_24_P499282    | Unknown                                                             | 8.70354   | 0.00001     |
| NM_022040    | LAT2            | Linker for activation of T cells family, member 2                   | 5.99705   | 0.0002      |
| AL122093     | ZP4             | Zona pellucida glycoprotein 4                                       | 6.09319   | 0.00018     |
| NM_012448    | STAT5B          | Signal transducer and activator of transcription 5B                 | 7.84235   | 0.00003     |
| NM_017777    | MKS1            | Meckel syndrome, type 1                                             | 6.36619   | 0.00013     |
| NM_052831    | C6orf192        | Chromosome 6 open reading frame 192                                 | -5.92287  | 0.00022     |
| NM_207336    | ZNF467          | Zinc finger protein 467                                             | 9.10574   | 7.75922E-06 |
| NM_005550    | KIFC3           | Kinesin family member C3                                            | 7.12481   | 0.00006     |
| NM_001312    | CRIP2           | Cysteine-rich protein 2                                             | 5.77985   | 0.00027     |
| XM_372970    | ENST00000312710 | Unknown                                                             | 6.04444   | 0.00019     |
| NM_015135    | NUP205          | Nucleoporin 205kDa                                                  | -9.28016  | 6.63981E-06 |
| NM_005800    | USPL1           | Ubiquitin specific peptidase like 1                                 | -6.5711   | 0.0001      |
| THC2284174   | THC2284174      | Unknown                                                             | -8.71174  | 0.00001     |
| A_24_P213175 | A_24_P213175    | Unknown                                                             | -5.91113  | 0.00023     |
| NM_000873    | ICAM2           | Intercellular adhesion molecule 2                                   | -6.44068  | 0.00012     |
| NM_014742    | TM9SF4          | Transmembrane 9 superfamily protein member 4                        | -9.05755  | 8.10401E-06 |

|              |              |                                                                                                                         |           |             |
|--------------|--------------|-------------------------------------------------------------------------------------------------------------------------|-----------|-------------|
| NM_003858    | CCNK         | Cyclin K                                                                                                                | -6.93939  | 0.00007     |
| NM_144498    | OSBPL2       | Oxysterol binding protein-like 2                                                                                        | -7.43179  | 0.00004     |
| NM_032819    | ZNF341       | Zinc finger protein 341                                                                                                 | 8.05677   | 0.00002     |
| A_24_P273004 | A_24_P273004 | Unknown                                                                                                                 | -11.34914 | 1.23637E-06 |
| NM_178170    | NEK8         | NIMA (never in mitosis gene a)- related kinase 8                                                                        | 15.27718  | 9.62147E-08 |
| NM_003791    | MBTPS1       | Membrane-bound transcription factor peptidase, site 1                                                                   | 6.5654    | 0.0001      |
| XM_497271    | A_24_P761490 | Unknown                                                                                                                 | 7.0537    | 0.00006     |
| NM_020800    | IFT80        | Intraflagellar transport 80 homolog (Chlamydomonas)                                                                     | -5.90569  | 0.00023     |
| NM_015412    | C3orf17      | Chromosome 3 open reading frame 17                                                                                      | -7.11308  | 0.00006     |
| NM_021064    | HIST1H2AG    | Histone cluster 1, H2ag                                                                                                 | 6.92417   | 0.00007     |
| NM_015893    | PRLH         | Prolactin releasing hormone                                                                                             | 8.0239    | 0.00002     |
| NM_024040    | CUEDC2       | CUE domain containing 2                                                                                                 | 6.71805   | 0.00009     |
| A_24_P340916 | A_24_P340916 | Unknown                                                                                                                 | 5.93574   | 0.00022     |
| NM_006738    | AKAP13       | A kinase (PRKA) anchor protein 13                                                                                       | 9.53395   | 5.31574E-06 |
| NM_014587    | SOX8         | SRY (sex determining region Y)-box 8                                                                                    | 6.76814   | 0.00008     |
| NM_001126    | ADSS         | Adenylosuccinate synthase                                                                                               | 6.04218   | 0.00019     |
| NM_014189    | ADD1         | Adducin 1 (alpha)                                                                                                       | 6.99685   | 0.00006     |
| NM_001024847 | TGFBR2       | Transforming growth factor, beta receptor II (70/80kDa)                                                                 | 5.75954   | 0.00027     |
| NM_014708    | KNTC1        | Kinetochore associated 1                                                                                                | -6.31481  | 0.00014     |
| NM_033402    | LRRCC1       | Leucine rich repeat and coiled-coil domain containing 1                                                                 | -7.93516  | 0.00002     |
| NM_006129    | BMP1         | Bone morphogenetic protein 1                                                                                            | 8.37174   | 0.00002     |
| NM_007260    | LYPLA2       | Lysophospholipase II                                                                                                    | 5.78566   | 0.00026     |
| AL834499     | LOC90113     | hypothetical protein BC009862                                                                                           | 8.85453   | 9.75368E-06 |
| BX640624     | IGHA1        | Immunoglobulin heavy constant alpha 1                                                                                   | 5.77955   | 0.00027     |
| NM_058187    | C21orf63     | Chromosome 21 open reading frame 63                                                                                     | 6.98823   | 0.00006     |
| AK055501     | RPL15        | Ribosomal protein L15                                                                                                   | -6.50653  | 0.00011     |
| AF039564     | RBBP9        | Homo sapiens retinoblastoma binding protein (RBBP9) mRNA, complete cds.                                                 | 7.94915   | 0.00002     |
| BC041387     | MCTP2        | Multiple C2 domains, transmembrane 2                                                                                    | -6.79143  | 0.00008     |
| A_23_P252501 | A_23_P252501 | Unknown                                                                                                                 | 10.69754  | 2.03582E-06 |
| NM_014023    | WDR37        | WD repeat domain 37                                                                                                     | -6.4766   | 0.00011     |
| NM_172037    | RDH10        | Retinol dehydrogenase 10 (all-trans)                                                                                    | 8.73814   | 0.00001     |
| A_24_P106166 | A_24_P106166 | Unknown                                                                                                                 | -6.28848  | 0.00014     |
| NM_178313    | SPTBN1       | Spectrin, beta, non-erythrocytic 1                                                                                      | 5.45395   | 0.0004      |
| THC2403165   | THC2403165   | Q6TXI7 (Q6TXI7) LRRGT00012, partial (4%) [THC2403165]                                                                   | -7.92713  | 0.00002     |
| NM_080660    | ZC3HAV1L     | Zinc finger CCCH-type, antiviral 1-like                                                                                 | 8.99264   | 8.59541E-06 |
| AK123844     | C9orf45      | Spermatid perinuclear RNA binding protein                                                                               | -6.84307  | 0.00008     |
| NM_207581    | DUOXA2       | Dual oxidase maturation factor 2                                                                                        | 7.20138   | 0.00005     |
| AK128714     | LOC647121    | similar to embigin homolog                                                                                              | -6.07806  | 0.00018     |
| NM_152906    | C22orf25     | Chromosome 22 open reading frame 25                                                                                     | 6.93325   | 0.00007     |
| NM_000982    | RPL21        | Ribosomal protein L21                                                                                                   | -6.65631  | 0.00009     |
| NM_133330    | WHSC1        | Wolf-Hirschhorn syndrome candidate 1                                                                                    | -10.55755 | 2.27388E-06 |
| NM_003636    | KCNAB2       | Potassium voltage-gated channel, shaker-related subfamily, beta member 2                                                | 8.84297   | 9.85807E-06 |
| NM_033064    | ATCAY        | Ataxia, cerebellar, Cayman type (caytaxin)                                                                              | 9.55873   | 5.20293E-06 |
| THC2427841   | THC2427841   | Q9JM93 (Q9JM93) SRp25 nuclear protein (ADP-ribosylation factor-like 6 interacting protein 4), partial (7%) [THC2427841] | -7.12454  | 0.00006     |
| NM_012115    | CASP8AP2     | CASP8 associated protein 2                                                                                              | -7.48469  | 0.00004     |
| XM_496950    | LOC441320    | PREDICTED: Homo sapiens similar to seven transmembrane helix receptor (LOC441320), mRNA [XM_496950]                     | 7.82806   | 0.00003     |
| NM_006521    | TFE3         | Transcription factor binding to IGHM enhancer 3                                                                         | -9.40066  | 5.97063E-06 |
| NM_032813    | TMTC4        | Transmembrane and tetratricopeptide repeat containing 4                                                                 | -7.55316  | 0.00003     |
| XM_929854    | LOC646890    | PREDICTED: Homo sapiens hypothetical protein LOC646890 (LOC646890), mRNA [XM_929854]                                    | -5.8798   | 0.00023     |
| NM_172193    | KLHDC1       | Kelch domain containing 1                                                                                               | 5.70628   | 0.00029     |
| NM_006289    | TLN1         | Talin 1                                                                                                                 | 5.85014   | 0.00024     |
| NM_004609    | TCF15        | Transcription factor 15 (basic helix-loop-helix)                                                                        | 6.93939   | 0.00007     |
| NM_018442    | IQWD1        | IQ motif and WD repeats 1                                                                                               | -11.63764 | 9.99374E-07 |
| NM_003110    | SP2          | Sp2 transcription factor                                                                                                | -7.66008  | 0.00003     |
| NM_016089    | ZNF589       | Zinc finger protein 589                                                                                                 | -7.66171  | 0.00003     |
| THC2378504   | THC2378504   | Unknown                                                                                                                 | -5.67893  | 0.0003      |
| NM_018117    | BRWD2        | Bromodomain and WD repeat domain containing 2                                                                           | -6.96869  | 0.00007     |
| NM_024676    | C1orf113     | Chromosome 1 open reading frame 113                                                                                     | 5.59764   | 0.00034     |
| AK098835     | ZFX1B        | Zinc finger homeobox 1b                                                                                                 | -5.92034  | 0.00022     |

|                 |                 |                                                                                                                                       |          |             |
|-----------------|-----------------|---------------------------------------------------------------------------------------------------------------------------------------|----------|-------------|
| NM_000235       | LIPA            | Lipase A, lysosomal acid, cholesterol esterase (Wolman disease)                                                                       | -6.63589 | 0.0001      |
| NM_001852       | COL9A2          | Collagen, type IX, alpha 2                                                                                                            | -7.20238 | 0.00005     |
| NM_021170       | HES4            | Hairy and enhancer of split 4 (Drosophila)                                                                                            | 9.59815  | 5.02884E-06 |
| NM_032340       | C6orf125        | Chromosome 6 open reading frame 125                                                                                                   | 12.24403 | 6.48527E-07 |
| NM_012407       | PICK1           | Protein interacting with PRKCA 1                                                                                                      | 6.45076  | 0.00012     |
| NM_005343       | HRAS            | V-Ha-ras Harvey rat sarcoma viral oncogene homolog                                                                                    | 5.45148  | 0.0004      |
| AK130576        | ARHGAP24        | Rho GTPase activating protein 24                                                                                                      | -5.8887  | 0.00023     |
| AL831999        | SUGT1           | MRNA; cDNA DKFZp451K063 (from clone DKFZp451K063)                                                                                     | -7.49324 | 0.00004     |
| DQ287932        | DPY19L1         | Dpy-19-like 1 (C. elegans)                                                                                                            | 7.50563  | 0.00004     |
| AK098256        | LOC728723       | hypothetical protein LOC728723                                                                                                        | 7.87079  | 0.00003     |
| THC2441708      | THC2441708      | Unknown                                                                                                                               | 9.15445  | 0.000007427 |
| NM_004649       | C21orf33        | Chromosome 21 open reading frame 33                                                                                                   | -7.56222 | 0.00003     |
| NM_021003       | PPM1A           | Protein phosphatase 1A (formerly 2C), magnesium-dependent, alpha isoform                                                              | -6.37986 | 0.00013     |
| AF307332        | MGEA5           | Meningioma expressed antigen 5 (hyaluronidase)                                                                                        | -6.55078 | 0.00011     |
| NM_005159       | ACTC1           | Actin, alpha, cardiac muscle 1                                                                                                        | 5.65957  | 0.00031     |
| NM_014824       | FCHSD2          | FCH and double SH3 domains 2                                                                                                          | -7.13614 | 0.00005     |
| NM_001397       | ECE1            | Endothelin converting enzyme 1                                                                                                        | 5.45317  | 0.0004      |
| NM_019042       | PUS7            | Pseudouridylate synthase 7 homolog (S. cerevisiae)                                                                                    | 8.95172  | 8.92198E-06 |
| NM_004096       | EIF4EBP2        | Eukaryotic translation initiation factor 4E binding protein 2                                                                         | -6.01179 | 0.0002      |
| A_32_P119165    | A_32_P119165    | Unknown                                                                                                                               | -6.04598 | 0.00019     |
| NM_013398       | ZNF224          | Zinc finger protein 224                                                                                                               | -6.49534 | 0.00011     |
| NM_001039888    | ANKRD34         | Ankyrin repeat domain 34                                                                                                              | -5.80244 | 0.00026     |
| A_24_P67378     | A_24_P67378     | Unknown                                                                                                                               | 6.82367  | 0.00008     |
| NM_152549       | CCDC112         | Coiled-coil domain containing 112                                                                                                     | -6.31102 | 0.00014     |
| AK092824        | AMN             | Amnionless homolog (mouse)                                                                                                            | -5.76454 | 0.00027     |
| NM_194247       | HNRPA3          | Heterogeneous nuclear ribonucleoprotein A3                                                                                            | 7.60297  | 0.00003     |
| NM_006569       | CGREF1          | Cell growth regulator with EF-hand domain 1                                                                                           | 8.72836  | 0.00001     |
| NM_152687       | C5orf29         | Chromosome 5 open reading frame 29                                                                                                    | -5.52685 | 0.00037     |
| NM_005436       | CCDC6           | Coiled-coil domain containing 6                                                                                                       | -7.57251 | 0.00003     |
| NM_017723       | FLJ20245        | hypothetical protein FLJ20245                                                                                                         | -8.75065 | 0.00001     |
| NM_020145       | SH3GLB2         | Sec23 homolog B (S. cerevisiae)                                                                                                       | 6.66636  | 0.00009     |
| A_24_P358205    | A_24_P358205    | Unknown                                                                                                                               | -7.12448 | 0.00006     |
| NM_001104       | ACTN3           | Actinin, alpha 3                                                                                                                      | 5.36436  | 0.00045     |
| NM_001111       | ADAR            | Adenosine deaminase, RNA-specific                                                                                                     | 6.46515  | 0.00012     |
| NM_024778       | LONRF3          | LON peptidase N-terminal domain and ring finger 3                                                                                     | 6.13423  | 0.00017     |
| NM_014670       | BZW1            | Basic leucine zipper and W2 domains 1                                                                                                 | 6.26341  | 0.00015     |
| NM_172020       | POM121          | POM121 membrane glycoprotein (rat)                                                                                                    | -8.87468 | 9.57445E-06 |
| NM_000539       | RHO             | Rhodopsin (opsin 2, rod pigment) (retinitis pigmentosa 4, autosomal dominant)                                                         | 8.27908  | 0.00002     |
| NM_020998       | MST1            | Macrophage stimulating 1 (hepatocyte growth factor-like)                                                                              | 8.08571  | 0.00002     |
| NM_014417       | BBC3            | BCL2 binding component 3                                                                                                              | 6.68822  | 0.00009     |
| NM_005796       | NUTF2           | Nuclear transport factor 2                                                                                                            | 5.44463  | 0.00041     |
| NM_153342       | TMEM150         | Transmembrane protein 150                                                                                                             | 5.64117  | 0.00032     |
| AK091057        | LOC285535       | hypothetical protein LOC285535                                                                                                        | -8.33776 | 0.00002     |
| NM_032932       | RAB11FIP4       | RAB11 family interacting protein 4 (class II)                                                                                         | -7.08778 | 0.00006     |
| A_32_P167723    | A_32_P167723    | Unknown                                                                                                                               | 6.59109  | 0.0001      |
| NM_001007793    | BUB3            | BUB3 budding uninhibited by benzimidazoles 3 homolog (yeast)                                                                          | 5.60451  | 0.00033     |
| ENST00000372821 | ENST00000372821 | Q6DEY7 (Q6DEY7) MGC89376 protein, partial (38%) [THC2400949]                                                                          | -7.5636  | 0.00003     |
| NM_032580       | HES7            | Hairy and enhancer of split 7 (Drosophila)                                                                                            | 8.7194   | 0.00001     |
| NM_144596       | TTC8            | Tetratricopeptide repeat domain 8                                                                                                     | -6.49123 | 0.00011     |
| NM_001024457    | RGPD1           | Plasminogen-like B1                                                                                                                   | -5.37308 | 0.00045     |
| NM_014157       | CCDC113         | Coiled-coil domain containing 113                                                                                                     | 7.65554  | 0.00003     |
| NM_152262       | ZNF439          | Zinc finger protein 439                                                                                                               | -5.84169 | 0.00025     |
| NM_015358       | MORC3           | MORC family CW-type zinc finger 3                                                                                                     | -6.20742 | 0.00016     |
| NM_197941       | ADAMTS6         | ADAM metalloproteinase with thrombospondin type 1 motif, 6                                                                            | -6.43052 | 0.00012     |
| NM_146421       | GSTM1           | Glutathione S-transferase M1                                                                                                          | 5.20983  | 0.00056     |
| NM_052861       | MGC21675        | hypothetical protein MGC21675                                                                                                         | -6.36104 | 0.00013     |
| NM_000182       | HADHA           | Hydroxyacyl-Coenzyme A dehydrogenase/3-ketoacyl-Coenzyme A thiolase/enoyl-Coenzyme A hydratase (trifunctional protein), alpha subunit | 8.29677  | 0.00002     |
| NM_017443       | POLE3           | Polymerase (DNA directed), epsilon 3 (p17 subunit)                                                                                    | -6.66635 | 0.00009     |
| NM_018254       | RCOR3           | REST corepressor 3                                                                                                                    | -6.75332 | 0.00008     |

|              |            |                                                                                                      |          |             |
|--------------|------------|------------------------------------------------------------------------------------------------------|----------|-------------|
| NM_153002    | GPR156     | G protein-coupled receptor 156                                                                       | 7.48264  | 0.00004     |
| NM_001010919 | LOC441168  | hypothetical protein LOC441168                                                                       | -8.95495 | 8.8957E-06  |
| NM_005452    | WDR46      | WD repeat domain 46                                                                                  | 5.35346  | 0.00046     |
| NM_004290    | RNF14      | Ring finger protein 14                                                                               | 5.61613  | 0.00033     |
| AK094269     | LOC285813  | hypothetical protein LOC285813                                                                       | -6.16194 | 0.00017     |
| NM_014641    | MDC1       | Mediator of DNA damage checkpoint 1                                                                  | -10.5734 | 2.24545E-06 |
| NM_018084    | KIAA1212   | KIAA1212                                                                                             | -5.64438 | 0.00032     |
| NM_001008735 | HMG1L1     | High-mobility group (nonhistone chromosomal) protein 1-like 1                                        | 6.98657  | 0.00006     |
| NM_001012398 | FTS        | Fused toes homolog (mouse)                                                                           | 5.31553  | 0.00048     |
| NM_016546    | C1RL       | Complement component 1, r subcomponent-like                                                          | -9.50091 | 5.47037E-06 |
| NM_003153    | STAT6      | Signal transducer and activator of transcription 6, interleukin-4 induced                            | -6.43102 | 0.00012     |
| NM_001074    | UGT2B7     | UDP glucuronosyltransferase 2 family, polypeptide B7                                                 | 7.85504  | 0.00003     |
| NM_013328    | PYCR2      | Proline-5-carboxylate reductase family, member 2                                                     | 5.42514  | 0.00042     |
| NM_015897    | PIAS4      | Protein inhibitor of activated STAT, 4                                                               | 6.55103  | 0.00011     |
| NM_001283    | AP1S1      | Adaptor-related protein complex 1, sigma 1 subunit                                                   | 5.21037  | 0.00056     |
| NM_000923    | PDE4C      | Phosphodiesterase 4C, cAMP-specific (phosphodiesterase E1 dunce homolog, Drosophila)                 | 7.48989  | 0.00004     |
| NM_018676    | THSD1      | Thrombospondin, type I, domain containing 1                                                          | -7.01524 | 0.00006     |
| NM_007042    | RPP14      | Ribonuclease P 14kDa subunit                                                                         | 5.88159  | 0.00023     |
| NM_015926    | TEX264     | Testis expressed sequence 264                                                                        | 6.03192  | 0.00019     |
| NM_021216    | ZNF71      | Zinc finger protein 71                                                                               | -7.39256 | 0.00004     |
| NM_001659    | ARF3       | ADP-ribosylation factor 3                                                                            | 6.08657  | 0.00018     |
| THC2435127   | THC2435127 | Unknown                                                                                              | -7.00523 | 0.00006     |
| NM_015153    | PHF3       | PHD finger protein 3                                                                                 | -7.08168 | 0.00006     |
| THC2407434   | THC2407434 | ALU1_HUMAN (P39188) Alu subfamily J sequence contamination warning entry, partial (20%) [THC2407434] | -9.80581 | 4.21166E-06 |
| NM_018051    | WDR60      | WD repeat domain 60                                                                                  | -5.79231 | 0.00026     |
| NM_177987    | TUBB8      | tubulin, beta 8                                                                                      | 5.56498  | 0.00035     |
| BC037535     | BC037535   | CDNA clone IMAGE:5263531                                                                             | -5.96076 | 0.00021     |
| NM_015568    | PPP1R16B   | Protein phosphatase 1, regulatory (inhibitor) subunit 16B                                            | -7.15947 | 0.00005     |
| NM_021813    | BACH2      | BTB and CNC homology 1, basic leucine zipper transcription factor 2                                  | -5.18425 | 0.00058     |
| THC2345721   | THC2345721 | Unknown                                                                                              | -5.77505 | 0.00027     |
| NM_015291    | DNAJC16    | DnaJ (Hsp40) homolog, subfamily C, member 16                                                         | -5.67192 | 0.0003      |
| THC2437034   | THC2437034 | Q9N083 (Q9N083) Unnamed portein product, partial (43%) [THC2437034]                                  | -5.95354 | 0.00021     |
| NM_004804    | CIAO1      | Cytosolic iron-sulfur protein assembly 1 homolog (S. cerevisiae)                                     | 9.32183  | 6.39948E-06 |
| NM_001558    | IL10RA     | Interleukin 10 receptor, alpha                                                                       | -7.16204 | 0.00005     |
| NM_006016    | CD164      | CD164 molecule, sialomucin                                                                           | 9.32468  | 6.38342E-06 |
| NM_003581    | NCK2       | NCK adaptor protein 2                                                                                | 7.177    | 0.00005     |
| NM_020432    | PHTF2      | Putative homeodomain transcription factor 2                                                          | -7.55837 | 0.00003     |
| NM_016263    | FZR1       | Fizzy/cell division cycle 20 related 1 (Drosophila)                                                  | 5.79913  | 0.00026     |
| NM_006901    | MYO9A      | Myosin IXA                                                                                           | -6.32218 | 0.00014     |
| BU661610     | BU661610   | Transcribed locus                                                                                    | -7.93911 | 0.00002     |
| NM_001310    | CREBL2     | CAMP responsive element binding protein-like 2                                                       | -8.63283 | 0.00001     |
| NM_015187    | KIAA0746   | KIAA0746 protein                                                                                     | -7.19882 | 0.00005     |
| NM_014319    | LEMD3      | LEM domain containing 3                                                                              | -5.23419 | 0.00054     |
| NM_021008    | DEAF1      | Deformed epidermal autoregulatory factor 1 (Drosophila)                                              | 7.79753  | 0.00003     |
| NM_015336    | ZDHHC17    | Zinc finger, DHHC-type containing 17                                                                 | -6.20521 | 0.00016     |
| NM_006888    | CALM1      | Calmodulin 1 (phosphorylase kinase, delta)                                                           | -6.26682 | 0.00015     |
| NM_018198    | DNAJC11    | DnaJ (Hsp40) homolog, subfamily C, member 11                                                         | 5.29002  | 0.0005      |
| AF277175     | KIAA0265   | KIAA0265 protein                                                                                     | -6.54094 | 0.00011     |
| NM_198974    | TWF1       | Twinfilin, actin-binding protein, homolog 1 (Drosophila)                                             | 9.75026  | 4.41488E-06 |
| NM_005370    | RAB8A      | RAB8A, member RAS oncogene family                                                                    | 5.7961   | 0.00026     |
| BG695979     | BG695979   | Transcribed locus                                                                                    | -6.26052 | 0.00015     |
| NM_019044    | CCDC93     | Coiled-coil domain containing 93                                                                     | -7.08537 | 0.00006     |
| NM_032377    | ELOF1      | Elongation factor 1 homolog (S. cerevisiae)                                                          | 5.33163  | 0.00047     |
| NM_020336    | KIAA1219   | KIAA1219                                                                                             | -9.56667 | 5.16733E-06 |
| NM_017704    | ANKRD49    | Ankyrin repeat domain 49                                                                             | -6.59777 | 0.0001      |
| BU618279     | PPP3CA     | Protein phosphatase 3 (formerly 2B), catalytic subunit, alpha isoform (calcineurin A alpha)          | 8.48486  | 0.00001     |
| NM_014730    | KIAA0152   | KIAA0152                                                                                             | 5.53054  | 0.00037     |
| NM_005153    | USP10      | Ubiquitin specific peptidase 10                                                                      | 6.93512  | 0.00007     |
| NM_001001433 | STX16      | Syntaxin 16                                                                                          | 8.14081  | 0.00002     |

|              |              |                                                                                   |           |             |
|--------------|--------------|-----------------------------------------------------------------------------------|-----------|-------------|
| BX098637     | RAD50        | Transcribed locus, weakly similar to NP_689672.2 protein LOC146556 [Homo sapiens] | -7.28539  | 0.00005     |
| NM_001885    | CRYAB        | Crystallin, alpha B                                                               | 7.84386   | 0.00003     |
| NR_002797    | LOC255783    | hypothetical protein LOC255783                                                    | 7.45402   | 0.00004     |
| NM_031219    | HDHD3        | Haloacid dehalogenase-like hydrolase domain containing 3                          | 6.5466    | 0.00011     |
| NM_019002    | ETAA1        | Ewing's tumor-associated antigen 1                                                | -6.00953  | 0.0002      |
| THC2250585   | THC2250585   | Unknown                                                                           | -10.02693 | 3.49902E-06 |
| NM_002999    | SDC4         | Syndecan 4 (amphiglycan, ryudocan)                                                | 5.27453   | 0.00051     |
| CR620831     | C12orf47     | Chromosome 12 open reading frame 47                                               | -7.40664  | 0.00004     |
| NM_005500    | SAE1         | SUMO1 activating enzyme subunit 1                                                 | -7.04103  | 0.00006     |
| NM_014045    | LRP10        | Low density lipoprotein receptor-related protein 10                               | 5.77774   | 0.00027     |
| NM_173622    | CDRT4        | CMT1A duplicated region transcript 4                                              | -6.39054  | 0.00013     |
| NM_000594    | TNF          | Tumor necrosis factor (TNF superfamily, member 2)                                 | 5.25446   | 0.00052     |
| NM_001822    | CHN1         | Chimerin (chimaerin) 1                                                            | 6.92225   | 0.00007     |
| A_24_P872359 | A_24_P872359 | Unknown                                                                           | 6.07579   | 0.00018     |
| NM_016219    | MAN1B1       | Mannosidase, alpha, class 1B, member 1                                            | 6.64725   | 0.00009     |
| NM_173607    | C14orf24     | Chromosome 14 open reading frame 24                                               | 7.36156   | 0.00004     |
| THC2349560   | THC2349560   | Unknown                                                                           | 6.3882    | 0.00013     |
| AK126092     | LOC221442    | hypothetical LOC221442                                                            | -6.7597   | 0.00008     |
| NM_006804    | STARD3       | START domain containing 3                                                         | 6.72679   | 0.00009     |
| NM_000848    | GSTM2        | Glutathione S-transferase M2 (muscle)                                             | 5.42214   | 0.00042     |
| NM_005399    | PRKAB2       | Protein kinase, AMP-activated, beta 2 non-catalytic subunit                       | -5.63095  | 0.00032     |
| NM_012296    | GAB2         | GRB2-associated binding protein 2                                                 | -6.86247  | 0.00007     |
| NM_024707    | GEMIN7       | Gem (nuclear organelle) associated protein 7                                      | -5.73351  | 0.00028     |
| NM_004162    | RAB5A        | RAB5A, member RAS oncogene family                                                 | 5.07256   | 0.00067     |
| NM_199072    | MDFIC        | MyoD family inhibitor domain containing                                           | 5.16111   | 0.00059     |
| NM_016454    | TMEM85       | Transmembrane protein 85                                                          | 6.36911   | 0.00013     |
| NM_024295    | DERL1        | Der1-like domain family, member 1                                                 | 6.49264   | 0.00011     |
| NM_017679    | BCAS3        | Breast carcinoma amplified sequence 3                                             | 7.15775   | 0.00005     |
| NM_152574    | C9orf52      | Chromosome 9 open reading frame 52                                                | -5.48097  | 0.00039     |
| NM_147190    | LASS5        | LAG1 homolog, ceramide synthase 5 (S. cerevisiae)                                 | 7.77914   | 0.00003     |
| A_32_P65793  | A_32_P65793  | Unknown                                                                           | 7.34402   | 0.00004     |
| NM_006923    | SDF2         | Stromal cell-derived factor 2                                                     | 5.09884   | 0.00065     |
| NM_001012423 | GOLGA8E      | Golgi autoantigen, golgin subfamily a, 8E                                         | 7.02657   | 0.00006     |
| A_24_P824578 | A_24_P824578 | Unknown                                                                           | 5.25718   | 0.00052     |
| NM_015550    | OSBPL3       | Oxysterol binding protein-like 3                                                  | -7.36736  | 0.00004     |
| NM_024653    | PRKRIP1      | Postmeiotic segregation increased 2-like 3                                        | 5.39368   | 0.00044     |
| NM_133636    | HEL308       | DNA helicase HEL308                                                               | -6.10973  | 0.00018     |
| A_32_P11425  | A_32_P11425  | Unknown                                                                           | 7.51075   | 0.00004     |
| THC2279840   | THC2279840   | Unknown                                                                           | -5.90895  | 0.00023     |
| CR623166     | TTC14        | Tetratricopeptide repeat domain 14                                                | -6.56973  | 0.0001      |
| NM_014868    | RNF10        | Ring finger protein 10                                                            | -6.69199  | 0.00009     |
| NM_207443    | FLJ45244     | FLJ45244 protein                                                                  | -6.99635  | 0.00006     |
| NM_012218    | ILF3         | Interleukin enhancer binding factor 3, 90kDa                                      | -9.40237  | 5.96169E-06 |
| NM_199345    | LOC375133    | similar to phosphatidylinositol 4-kinase alpha                                    | 6.26274   | 0.00015     |
| NM_017727    | FLJ20254     | hypothetical protein FLJ20254                                                     | 6.90032   | 0.00007     |
| A_32_P1291   | A_32_P1291   | Unknown                                                                           | 7.28232   | 0.00005     |
| BC020095     | MGC17403     | hypothetical protein MGC17403                                                     | -6.5012   | 0.00011     |
| NM_002729    | HHEX         | Homeobox, hematopoietically expressed                                             | -7.00539  | 0.00006     |
| A_32_P112100 | A_32_P112100 | Unknown                                                                           | 5.97742   | 0.00021     |
| XM_941086    | LOC651831    | similar to CG31232-PA, isoform A                                                  | 5.07231   | 0.00067     |
| AK024092     | CHD2         | Chromodomain helicase DNA binding protein 2                                       | -5.56197  | 0.00035     |
| AJ227863     | MBNL1        | Muscleblind-like (Drosophila)                                                     | -6.04839  | 0.00019     |
| NM_015678    | NBEA         | Neurobeachin                                                                      | -5.67699  | 0.0003      |
| NM_003611    | OFD1         | Oral-facial-digital syndrome 1                                                    | -6.13772  | 0.00017     |
| NM_021144    | PSIP1        | PC4 and SFRS1 interacting protein 1                                               | -5.05928  | 0.00068     |
| THC2441367   | THC2441367   | Unknown                                                                           | -6.27525  | 0.00015     |
| AJ001898     | GDNF         | Glial cell derived neurotrophic factor                                            | 6.43449   | 0.00012     |
| NM_014781    | RB1CC1       | RB1-inducible coiled-coil 1                                                       | -6.24829  | 0.00015     |
| BC022830     | LOC642852    | hypothetical LOC642852                                                            | 6.3943    | 0.00013     |

|              |              |                                                                                                     |          |             |
|--------------|--------------|-----------------------------------------------------------------------------------------------------|----------|-------------|
| BX337332     | BX337332     | Transcribed locus, moderately similar to XP_001136080.1 hypothetical protein [Pan troglodytes]      | -6.2502  | 0.00015     |
| NM_001006634 | ARHGAP17     | Rho GTPase activating protein 17                                                                    | -8.33571 | 0.00002     |
| NM_006761    | YWHAE        | Tyrosine 3-monooxygenase/tryptophan 5-monooxygenase activation protein, epsilon polypeptide         | 4.97347  | 0.00077     |
| NM_002498    | NEK3         | NIMA (never in mitosis gene a)-related kinase 3                                                     | -5.97924 | 0.00021     |
| CR605444     | FBXL4        | F-box and leucine-rich repeat protein 4                                                             | -5.49736 | 0.00038     |
| NM_017991    | FLJ10081     | hypothetical protein FLJ10081                                                                       | -8.26415 | 0.00002     |
| NM_000428    | LTBP2        | Latent transforming growth factor beta binding protein 2                                            | 7.35375  | 0.00004     |
| NM_133439    | TADA2L       | Transcriptional adaptor 2 (ADA2 homolog, yeast)-like                                                | 5.53759  | 0.00036     |
| NM_005718    | ARPC4        | Actin related protein 2/3 complex, subunit 4, 20kDa                                                 | 5.39072  | 0.00044     |
| A_24_P238819 | A_24_P238819 | Unknown                                                                                             | 7.58575  | 0.00003     |
| NM_024069    | C19orf50     | Chromosome 19 open reading frame 50                                                                 | -8.00106 | 0.00002     |
| NM_005665    | EV15         | Ecotropic viral integration site 5                                                                  | -6.01249 | 0.0002      |
| NM_002211    | ITGB1        | Integrin, beta 1 (fibronectin receptor, beta polypeptide, antigen CD29 includes MDF2, MSK12)        | -6.426   | 0.00012     |
| NM_022362    | MMS19L       | MMS19-like (MET18 homolog, <i>S. cerevisiae</i> )                                                   | -7.9471  | 0.00002     |
| AK022140     | FLJ12078     | hypothetical protein FLJ12078                                                                       | -5.85668 | 0.00024     |
| NM_017730    | QRICH1       | Glutamine-rich 1                                                                                    | -7.12784 | 0.00005     |
| NM_001989    | EVX1         | Eve, even-skipped homeobox homolog 1 ( <i>Drosophila</i> )                                          | 7.23511  | 0.00005     |
| NM_018405    | C17orf79     | Chromosome 17 open reading frame 79                                                                 | 5.68363  | 0.0003      |
| A_32_P167212 | A_32_P167212 | Unknown                                                                                             | -5.12463 | 0.00062     |
| NM_006711    | RNPS1        | RNA binding protein S1, serine-rich domain                                                          | 6.2515   | 0.00015     |
| DB341590     | LOC728499    | similar to Nuclear envelope pore membrane protein POM 121 (Pore membrane protein of 121 kDa) (P145) | -5.18063 | 0.00058     |
| BE535679     | BE535679     | Transcribed locus                                                                                   | -6.17163 | 0.00016     |
| A_32_P327750 | A_32_P327750 | Unknown                                                                                             | 5.15782  | 0.0006      |
| NM_018035    | FLJ10241     | hypothetical protein FLJ10241                                                                       | 5.1834   | 0.00058     |
| NM_021727    | FADS3        | Fatty acid desaturase 3                                                                             | 5.3224   | 0.00048     |
| NM_181607    | KRTAP19-1    | Keratin associated protein 19-1                                                                     | 5.70077  | 0.00029     |
| NM_003199    | TCF4         | Transcription factor 4                                                                              | -5.32466 | 0.00048     |
| AK024898     | AK024898     | CDNA: FLJ21245 fis, clone COL01184                                                                  | -7.51329 | 0.00004     |
| NM_001018055 | BRCC3        | BRCA1/BRCA2-containing complex, subunit 3                                                           | -5.30636 | 0.00049     |
| NM_016238    | ANAPC7       | Anaphase promoting complex subunit 7                                                                | 5.43935  | 0.00041     |
| NM_013259    | TAGLN3       | Transgelin 3                                                                                        | 6.8389   | 0.00008     |
| NM_001010983 | GLT8D1       | Glycosyltransferase 8 domain containing 1                                                           | -5.69977 | 0.00029     |
| NM_006390    | IPO8         | Importin 8                                                                                          | 6.90698  | 0.00007     |
| NM_005520    | HNRPH1       | Heterogeneous nuclear ribonucleoprotein H1 (H)                                                      | -8.24555 | 0.00002     |
| NM_145233    | ZNF625       | Zinc finger protein 20                                                                              | 6.01856  | 0.0002      |
| NM_020805    | KLHL14       | Kelch-like 14 ( <i>Drosophila</i> )                                                                 | -8.24609 | 0.00002     |
| AV698092     | C6orf62      | Transcribed locus                                                                                   | 5.96382  | 0.00021     |
| NM_002945    | RPA1         | Replication protein A1, 70kDa                                                                       | -7.5748  | 0.00003     |
| NM_182691    | SRPK2        | SFRS protein kinase 2                                                                               | 5.04526  | 0.00069     |
| NM_138706    | B3GNT6       | UDP-GlcNAc:betaGal beta-1,3-N-acetylglucosaminyltransferase 6 (core 3 synthase)                     | 7.94837  | 0.00002     |
| NM_007172    | NUP50        | Nucleoporin 50kDa                                                                                   | 5.09318  | 0.00065     |
| AJ404330     | TBC1D12      | TBC1 domain family, member 12                                                                       | -8.08182 | 0.00002     |
| THC2312756   | THC2312756   | O60448 (O60448) Neuronal thread protein AD7c-NTP, partial (9%) [THC2312756]                         | -6.28489 | 0.00014     |
| NM_004897    | MINPP1       | Multiple inositol polyphosphate histidine phosphatase, 1                                            | 4.91264  | 0.00083     |
| NM_013335    | GMPPA        | GDP-mannose pyrophosphorylase A                                                                     | 5.16344  | 0.00059     |
| THC2377877   | THC2377877   | Q87WI3 (Q87WI3) Dipeptide ABC transporter, permease protein, partial (5%) [THC2377877]              | -5.53889 | 0.00036     |
| A_24_P256050 | A_24_P256050 | Unknown                                                                                             | 5.35666  | 0.00046     |
| A_32_P12282  | A_32_P12282  | Unknown                                                                                             | 8.58347  | 0.00001     |
| NM_005056    | JARID1A      | Jumonji, AT rich interactive domain 1A                                                              | -4.92183 | 0.00082     |
| NM_020230    | PPAN         | Peter pan homolog ( <i>Drosophila</i> )                                                             | 5.57565  | 0.00034     |
| NM_032558    | HIATL1       | Hippocampus abundant transcript-like 1                                                              | 7.72907  | 0.00003     |
| NM_030672    | ARHGAP28     | Rho GTPase activating protein 28                                                                    | 7.72512  | 0.00003     |
| NM_001005386 | ACTR2        | ARP2 actin-related protein 2 homolog (yeast)                                                        | 6.62652  | 0.0001      |
| NM_001012968 | LOC139886    | hypothetical protein LOC139886                                                                      | -5.45114 | 0.00041     |
| NM_183001    | SHC1         | SHC (Src homology 2 domain containing) transforming protein 1                                       | 8.174    | 0.00002     |
| CR620532     | RASA2        | RAS p21 protein activator 2                                                                         | -6.29865 | 0.00014     |
| NM_177543    | PPAP2C       | Phosphatidic acid phosphatase type 2C                                                               | 8.2774   | 0.00002     |
| NM_018381    | FLJ11286     | hypothetical protein FLJ11286                                                                       | -9.16765 | 7.33973E-06 |
| XM_497140    | A_24_P135921 | Unknown                                                                                             | 4.9042   | 0.00084     |

|                 |                 |                                                                                                                            |          |             |
|-----------------|-----------------|----------------------------------------------------------------------------------------------------------------------------|----------|-------------|
| NM_000819       | GART            | Phosphoribosylglycinamide formyltransferase, phosphoribosylglycinamide synthetase, phosphoribosylaminoimidazole synthetase | 5.26257  | 0.00052     |
| NM_002009       | FGF7            | Fibroblast growth factor 7 (keratinocyte growth factor)                                                                    | 4.87946  | 0.00087     |
| NM_003316       | TTC3            | Tetratricopeptide repeat domain 3                                                                                          | -5.03045 | 0.00071     |
| NM_013326       | C18orf8         | Chromosome 18 open reading frame 8                                                                                         | -6.43782 | 0.00012     |
| AF419616        | NBPF10          | Neuroblastoma breakpoint family, member 10                                                                                 | -6.22377 | 0.00015     |
| NM_004329       | BMPR1A          | Bone morphogenetic protein receptor, type IA                                                                               | 6.20251  | 0.00016     |
| A_24_P915883    | A_24_P915883    | Unknown                                                                                                                    | 5.59313  | 0.00034     |
| NM_018486       | HDAC8           | Histone deacetylase 8                                                                                                      | 5.80887  | 0.00026     |
| THC2364821      | THC2364821      | Unknown                                                                                                                    | 6.33357  | 0.00014     |
| NM_002540       | ODF2            | Outer dense fiber of sperm tails 2                                                                                         | -8.03397 | 0.00002     |
| NM_199437       | PRDM10          | PR domain containing 10                                                                                                    | -5.28301 | 0.00051     |
| NM_032179       | CPSF3L          | Homo sapiens cleavage and polyadenylation specific factor 3-like (CPSF3L), transcript variant 2, mRNA [NM_032179]          | 5.25928  | 0.00052     |
| NM_016598       | ZDHHC3          | Zinc finger, DHHC-type containing 3                                                                                        | -7.1702  | 0.00005     |
| BU852331        | BU852331        | Transcribed locus                                                                                                          | 8.69121  | 0.00001     |
| NM_004882       | CIR             | CBF1 interacting corepressor                                                                                               | -5.75692 | 0.00027     |
| NM_000425       | L1CAM           | L1 cell adhesion molecule                                                                                                  | 6.26131  | 0.00015     |
| NM_022757       | CCDC14          | Coiled-coil domain containing 14                                                                                           | -5.98571 | 0.00021     |
| A_24_P204454    | A_24_P204454    | Unknown                                                                                                                    | -5.98313 | 0.00021     |
| NM_015020       | PHLPPL          | PH domain and leucine rich repeat protein phosphatase-like                                                                 | -6.317   | 0.00014     |
| A_24_P170309    | A_24_P170309    | Unknown                                                                                                                    | 5.14466  | 0.00061     |
| A_24_P392099    | A_24_P392099    | Unknown                                                                                                                    | 5.32541  | 0.00048     |
| AK027248        | LOC56757        | hypothetical protein LOC56757                                                                                              | -8.86084 | 9.69717E-06 |
| NM_170607       | MLX             | MAX-like protein X                                                                                                         | 6.44866  | 0.00012     |
| BC037281        | LOC439951       | hypothetical LOC439951 protein                                                                                             | 8.02017  | 0.00002     |
| NM_003800       | RNGTT           | RNA guanylyltransferase and 5'-phosphatase                                                                                 | -7.68253 | 0.00003     |
| NM_198829       | RAC1            | Ras-related C3 botulinum toxin substrate 1 (rho family, small GTP binding protein Rac1)                                    | 6.91893  | 0.00007     |
| THC2282321      | THC2282321      | AF235005 suppression of tumorigenicity 16 protein {Homo sapiens;}, partial (13%) [THC2282321]                              | -4.99222 | 0.00075     |
| NM_014828       | KIAA0737        | KIAA0737                                                                                                                   | -7.25431 | 0.00005     |
| X82545          | PRNP            | Prion protein (p27-30) (Creutzfeldt-Jakob disease, Gerstmann-Strausler-Scheinker syndrome, fatal familial insomnia)        | 9.03795  | 8.24904E-06 |
| NM_017634       | KCTD9           | Potassium channel tetramerisation domain containing 9                                                                      | -7.29441 | 0.00005     |
| NM_012268       | PLD3            | Phospholipase D family, member 3                                                                                           | 7.3033   | 0.00005     |
| NM_017633       | FAM46A          | Family with sequence similarity 46, member A                                                                               | -5.89253 | 0.00023     |
| NM_016353       | ZDHHC2          | Zinc finger, DHHC-type containing 2                                                                                        | 6.58499  | 0.0001      |
| NM_005845       | ABCC4           | ATP-binding cassette, sub-family C (CFTR/MRP), member 4                                                                    | 5.25204  | 0.00053     |
| THC2279840      | THC2279840      | Unknown                                                                                                                    | -6.05565 | 0.00019     |
| ENST00000361859 | ENST00000361859 | Unknown                                                                                                                    | 5.9073   | 0.00023     |
| BX538248        | BX538248        | CDNA clone IMAGE:30408657                                                                                                  | -5.68515 | 0.0003      |
| AK095904        | MIA3            | Melanoma inhibitory activity family, member 3                                                                              | -7.19205 | 0.00005     |
| NM_003040       | SLC4A2          | Solute carrier family 4, anion exchanger, member 2 (erythrocyte membrane protein band 3-like 1)                            | 5.0469   | 0.00069     |
| NM_138819       | FAM122C         | Family with sequence similarity 122C                                                                                       | -6.11779 | 0.00018     |
| NM_015442       | CNOT10          | CCR4-NOT transcription complex, subunit 10                                                                                 | -6.29023 | 0.00014     |
| NM_152270       | SLFN11          | Schlafen family member 11                                                                                                  | -6.48172 | 0.00011     |
| AF085995        | LOC645513       | similar to septin 7                                                                                                        | -6.71126 | 0.00009     |
| NM_144566       | ZNF700          | Zinc finger protein 700                                                                                                    | -7.22033 | 0.00005     |
| NM_002570       | PCSK6           | Proprotein convertase subtilisin/kexin type 6                                                                              | 7.32909  | 0.00004     |
| NM_014827       | ZC3H11A         | Zinc finger CCCH-type containing 11A                                                                                       | -7.8499  | 0.00003     |
| NM_000234       | LIG1            | Ligase I, DNA, ATP-dependent                                                                                               | -5.36772 | 0.00045     |
| NM_052928       | SMYD4           | SET and MYND domain containing 4                                                                                           | -5.63457 | 0.00032     |
| THC2386194      | THC2386194      | Unknown                                                                                                                    | -5.35511 | 0.00046     |
| NM_005358       | LMO7            | LIM domain 7                                                                                                               | -7.08854 | 0.00006     |
| NM_022833       | FAM129B         | Family with sequence similarity 129, member B                                                                              | 7.60785  | 0.00003     |
| NM_181831       | NF2             | Neurofibromin 2 (bilateral acoustic neuroma)                                                                               | 5.7013   | 0.00029     |
| NM_016551       | TM7SF3          | Transmembrane 7 superfamily member 3                                                                                       | -5.82276 | 0.00025     |
| NM_057169       | GIT2            | G protein-coupled receptor kinase interactor 2                                                                             | -6.32361 | 0.00014     |
| AK000923        | SENTP3          | Homo sapiens cDNA FLJ10061 fis, clone HEMBA1001413.                                                                        | -5.87671 | 0.00024     |
| NM_033551       | LARP1           | La ribonucleoprotein domain family, member 1                                                                               | -7.90965 | 0.00002     |
| NM_015051       | TXNDC4          | Thioredoxin domain containing 4 (endoplasmic reticulum)                                                                    | -6.64755 | 0.00009     |
| THC2339776      | THC2339776      | Unknown                                                                                                                    | -8.41951 | 0.00001     |
| AK024900        | AK024900        | CDNA: FLJ21247 fis, clone COL01205                                                                                         | -7.56648 | 0.00003     |



|                 |                 |                                                                                                |          |         |
|-----------------|-----------------|------------------------------------------------------------------------------------------------|----------|---------|
| A_24_P799580    | A_24_P799580    | Unknown                                                                                        | 6.60497  | 0.0001  |
| ENST00000360523 | ENST00000360523 | GB AB065479.1 BAC05733.1 seven transmembrane helix receptor [Homo sapiens] [NP511107]          | 6.64141  | 0.00009 |
| A_24_P32836     | A_24_P32836     | Unknown                                                                                        | -6.19519 | 0.00016 |
| AB020633        | FRYL            | FRY-like                                                                                       | -6.38433 | 0.00013 |
| NM_002118       | HLA-DMB         | Major histocompatibility complex, class II, DM beta                                            | -5.54567 | 0.00036 |
| THC2408277      | THC2408277      | Unknown                                                                                        | -5.38709 | 0.00044 |
| NM_017994       | C7orf42         | Chromosome 7 open reading frame 42                                                             | -6.74705 | 0.00008 |
| NM_001659       | ARF3            | ADP-ribosylation factor 3                                                                      | 5.1421   | 0.00061 |
| NM_001752       | CAT             | Catalase                                                                                       | -5.64093 | 0.00032 |
| NM_020657       | ZNF304          | Zinc finger protein 304                                                                        | -6.87846 | 0.00007 |
| BC056896        | HSPC157         | HSPC157 protein                                                                                | -5.44409 | 0.00041 |
| NM_014859       | KIAA0672        | KIAA0672 gene product                                                                          | -7.21036 | 0.00005 |
| NM_178520       | TMEM105         | Transmembrane protein 105                                                                      | 6.20265  | 0.00016 |
| NM_001011538    | LOC402176       | similar to 60S ribosomal protein L21                                                           | -7.23041 | 0.00005 |
| NM_133446       | CTGLF1          | Centaurin, gamma-like family, member 1                                                         | -7.90796 | 0.00002 |
| NM_194314       | ZBTB41          | Zinc finger and BTB domain containing 41                                                       | -7.18381 | 0.00005 |
| NM_015609       | C1orf144        | Chromosome 1 open reading frame 144                                                            | 5.0769   | 0.00067 |
| BC043279        | BC043279        | CDNA clone IMAGE:5297259                                                                       | -6.22554 | 0.00015 |
| NM_053042       | KIAA1729        | KIAA1729 protein                                                                               | -7.36048 | 0.00004 |
| AK096054        | SLC6A19         | Solute carrier family 6 (neutral amino acid transporter), member 19                            | 6.73775  | 0.00008 |
| NM_014990       | GARNL1          | GTPase activating Rap/RanGAP domain-like 1                                                     | -8.21092 | 0.00002 |
| NM_014362       | HIBCH           | 3-hydroxyisobutyryl-Coenzyme A hydrolase                                                       | -5.28173 | 0.00051 |
| NM_006804       | STARD3          | START domain containing 3                                                                      | 6.12902  | 0.00017 |
| NM_001042       | SLC2A4          | Solute carrier family 2 (facilitated glucose transporter), member 4                            | 8.12027  | 0.00002 |
| NM_001040440    | CCDC112         | Coiled-coil domain containing 112                                                              | -4.8855  | 0.00086 |
| NM_020918       | GPAM            | Glycerol-3-phosphate acyltransferase, mitochondrial                                            | -6.05652 | 0.00019 |
| NM_020381       | PDSS2           | Prenyl (decaprenyl) diphosphate synthase, subunit 2                                            | -5.38002 | 0.00044 |
| NM_001029857    | LOC158381       | hypothetical protein LOC158381                                                                 | 6.13599  | 0.00017 |
| BX641669        | ACOX1           | Acyl-Coenzyme A oxidase 1, palmitoyl                                                           | -6.4566  | 0.00012 |
| NM_033161       | SURF4           | Surfeit 4                                                                                      | 6.55595  | 0.0001  |
| NM_144673       | CMTM2           | CKLF-like MARVEL transmembrane domain containing 2                                             | 5.76847  | 0.00027 |
| NM_015659       | RSL1D1          | Ribosomal L1 domain containing 1                                                               | 5.34644  | 0.00046 |
| AK021842        | FLJ25476        | FLJ25476 protein                                                                               | 6.14491  | 0.00017 |
| NM_183233       | SLC22A18        | Solute carrier family 22 (organic cation transporter), member 18                               | 5.61224  | 0.00033 |
| NM_024649       | BBS1            | Bardet-Biedl syndrome 1                                                                        | -6.4087  | 0.00012 |
| ENST00000373264 | ENST00000373264 | Unknown                                                                                        | 5.31863  | 0.00048 |
| NM_025228       | TRAF3IP3        | TRAF3 interacting protein 3                                                                    | -5.6509  | 0.00031 |
| NM_005718       | ARPC4           | Actin related protein 2/3 complex, subunit 4, 20kDa                                            | 5.28128  | 0.00051 |
| NM_007234       | DCTN3           | Dynactin 3 (p22)                                                                               | 5.24163  | 0.00053 |
| NM_014949       | KIAA0907        | KIAA0907                                                                                       | 7.69915  | 0.00003 |
| NM_001024847    | TGFBR2          | Transforming growth factor, beta receptor II (70/80kDa)                                        | -7.62359 | 0.00003 |
| A_24_P399341    | A_24_P399341    | Unknown                                                                                        | -6.21519 | 0.00016 |
| AK098491        | OR5T2           | RPA interacting protein                                                                        | -5.42913 | 0.00042 |
| BC039296        | C20orf19        | Chromosome 20 open reading frame 19                                                            | -5.18365 | 0.00058 |
| NM_005026       | PIK3CD          | Phosphoinositide-3-kinase, catalytic, delta polypeptide                                        | 6.21873  | 0.00016 |
| NM_005119       | THRAP3          | Thyroid hormone receptor associated protein 3                                                  | 8.12691  | 0.00002 |
| AB051518        | KIAA1731        | KIAA1731                                                                                       | -5.99995 | 0.0002  |
| BC012484        | TNRC15          | Homo sapiens trinucleotide repeat containing 15, mRNA (cDNA clone IMAGE:4472100), partial cds. | -6.86227 | 0.00007 |
| NM_001119       | ADD1            | Adducin 1 (alpha)                                                                              | 6.32625  | 0.00014 |
| NM_173511       | ALS2CR13        | Amyotrophic lateral sclerosis 2 (juvenile) chromosome region, candidate 13                     | -4.78976 | 0.00099 |
| NM_014813       | LRIG2           | Leucine-rich repeats and immunoglobulin-like domains 2                                         | -6.24565 | 0.00015 |
| NM_015143       | METAP1          | Methionyl aminopeptidase 1                                                                     | 6.82305  | 0.00008 |
| NM_206962       | PRMT2           | Protein arginine methyltransferase 2                                                           | 5.94335  | 0.00022 |
| AK001118        | UBR2            | Ubiquitin protein ligase E3 component n-recognin 2                                             | -4.83769 | 0.00092 |
| THC2314600      | THC2314600      | Unknown                                                                                        | -7.0493  | 0.00006 |
| NM_002950       | RPN1            | Ribophorin I                                                                                   | -7.71446 | 0.00003 |
| NM_014969       | WDR47           | WD repeat domain 47                                                                            | -4.99127 | 0.00075 |
| AK130862        | FLJ27352        | hypothetical LOC145788                                                                         | -6.98877 | 0.00006 |
| NM_003104       | SORD            | Sorbitol dehydrogenase                                                                         | -5.18411 | 0.00058 |

|              |              |                                                                                                                           |          |         |
|--------------|--------------|---------------------------------------------------------------------------------------------------------------------------|----------|---------|
| NM_033017    | TRIM4        | Tripartite motif-containing 4                                                                                             | 5.35891  | 0.00046 |
| AK025221     | RAD50        | RAD50 homolog (S. cerevisiae)                                                                                             | -7.71671 | 0.00003 |
| NM_144664    | FAM76B       | Family with sequence similarity 76, member B                                                                              | -5.5059  | 0.00038 |
| NM_012219    | MRAS         | Muscle RAS oncogene homolog                                                                                               | 6.83581  | 0.00008 |
| THC2437476   | THC2437476   | Unknown                                                                                                                   | -7.20877 | 0.00005 |
| BX116997     | BX116997     | Transcribed locus                                                                                                         | -6.06866 | 0.00019 |
| NM_016272    | TOB2         | Transducer of ERBB2, 2                                                                                                    | -5.96088 | 0.00021 |
| NM_023111    | FGFR1        | Fibroblast growth factor receptor 1 (fms-related tyrosine kinase 2, Pfeiffer syndrome)                                    | 5.0047   | 0.00073 |
| NM_152756    | RICTOR       | rapamycin-insensitive companion of mTOR                                                                                   | -5.79934 | 0.00026 |
| CR590163     | KIAA2018     | KIAA2018                                                                                                                  | -5.82281 | 0.00025 |
| NM_006141    | DYNC1LI2     | Dynein, cytoplasmic 1, light intermediate chain 2                                                                         | -5.10652 | 0.00064 |
| NM_005088    | CXYorf3      | Chromosome X and Y open reading frame 3                                                                                   | -5.75059 | 0.00028 |
| NM_003309    | TSPYL1       | TSPY-like 1                                                                                                               | -6.02861 | 0.0002  |
| NM_004891    | MRPL33       | Mitochondrial ribosomal protein L33                                                                                       | -7.30793 | 0.00005 |
| NM_033406    | FBXO3        | F-box protein 3                                                                                                           | 6.64954  | 0.00009 |
| NM_001037533 | GON4L        | YY1 associated protein 1                                                                                                  | -7.07118 | 0.00006 |
| NM_004323    | BAG1         | BCL2-associated athanogene                                                                                                | -4.94334 | 0.0008  |
| NM_198567    | C5orf25      | Chromosome 5 open reading frame 25                                                                                        | -6.25358 | 0.00015 |
| NM_006709    | EHMT2        | Euchromatic histone-lysine N-methyltransferase 2                                                                          | 5.73631  | 0.00028 |
| NM_004375    | COX11        | COX11 homolog, cytochrome c oxidase assembly protein (yeast)                                                              | -4.9474  | 0.00079 |
| AK074291     | HIPK2        | Homeodomain interacting protein kinase 2                                                                                  | -7.86645 | 0.00003 |
| NM_001032289 | SLC35A2      | Solute carrier family 35 (UDP-galactose transporter), member A2                                                           | -8.23296 | 0.00002 |
| NM_002778    | PSAP         | Prosaposin (variant Gaucher disease and variant metachromatic leukodystrophy)                                             | 4.87526  | 0.00088 |
| NM_012330    | MYST4        | MYST histone acetyltransferase (monocytic leukemia) 4                                                                     | -6.78062 | 0.00008 |
| AW518445     | RPS23        | Ribosomal protein S23                                                                                                     | -6.93887 | 0.00007 |
| NM_021260    | ZFYVE1       | Zinc finger, FYVE domain containing 1                                                                                     | -5.06342 | 0.00068 |
| NM_005052    | RAC3         | Ras-related C3 botulinum toxin substrate 3 (rho family, small GTP binding protein Rac3)                                   | 7.20917  | 0.00005 |
| A_24_P24790  | A_24_P24790  | Unknown                                                                                                                   | -5.64628 | 0.00032 |
| A_32_P122285 | A_32_P122285 | Unknown                                                                                                                   | -5.35697 | 0.00046 |
| NM_006885    | ATBF1        | AT-binding transcription factor 1                                                                                         | 7.13739  | 0.00005 |
| NM_020382    | SETD8        | SET domain containing (lysine methyltransferase) 8                                                                        | 5.29077  | 0.0005  |
| NM_000202    | IDS          | Iduronate 2-sulfatase (Hunter syndrome)                                                                                   | -5.14859 | 0.0006  |
| A_24_P93184  | A_24_P93184  | Unknown                                                                                                                   | 5.20135  | 0.00056 |
| NM_002557    | OVGP1        | Oviductal glycoprotein 1, 120kDa (mucin 9, oviductin)                                                                     | -6.11482 | 0.00018 |
| U68019       | SMAD3        | SMAD family member 3                                                                                                      | -5.73809 | 0.00028 |
| NM_001120    | TETRA        | tetracycline transporter-like protein                                                                                     | 5.16055  | 0.00059 |
| A_24_P298616 | A_24_P298616 | Unknown                                                                                                                   | -5.85459 | 0.00024 |
| NM_199341    | LOC374920    | hypothetical protein LOC374920                                                                                            | -6.70474 | 0.00009 |
| AK025695     | TMED8        | Glutathione transferase zeta 1 (maleylacetoacetate isomerase)                                                             | -6.84167 | 0.00008 |
| NM_002721    | PPP6C        | Protein phosphatase 6, catalytic subunit                                                                                  | -6.83703 | 0.00008 |
| NM_001229    | CASP9        | Caspase 9, apoptosis-related cysteine peptidase                                                                           | -7.15685 | 0.00005 |
| NM_017541    | CRYGS        | Crystallin, gamma S                                                                                                       | -6.28412 | 0.00014 |
| NM_001013406 | KRIT1        | KRIT1, ankyrin repeat containing                                                                                          | 8.09633  | 0.00002 |
| NM_005867    | DSCR4        | Down syndrome critical region gene 4                                                                                      | 4.79505  | 0.00098 |
| NM_004187    | JARID1C      | Jumonji, AT rich interactive domain 1C                                                                                    | -4.8437  | 0.00092 |
| A_32_P32905  | A_32_P32905  | Unknown                                                                                                                   | -5.02028 | 0.00072 |
| XM_934270    | LOC647065    | hypothetical LOC647065                                                                                                    | -5.78325 | 0.00026 |
| AK097149     | SPPL3        | signal peptide peptidase 3                                                                                                | -5.07639 | 0.00067 |
| NM_002004    | FDPS         | Farnesyl diphosphate synthase (farnesyl pyrophosphate synthetase, dimethylallyltranstransferase, geranyltranstransferase) | -7.93324 | 0.00002 |
| A_24_P109962 | A_24_P109962 | Unknown                                                                                                                   | 6.63781  | 0.0001  |
| AK092875     | AK092875     | CDNA FLJ35556 fis, clone SPLEN2004844                                                                                     | 6.52427  | 0.00011 |
| NM_014847    | UBAP2L       | Ubiquitin associated protein 2-like                                                                                       | 7.49946  | 0.00004 |
| AA902595     | IQGAP1       | IQ motif containing GTPase activating protein 1                                                                           | -7.31533 | 0.00004 |
| AK125206     | LOC149448    | hypothetical protein LOC149448                                                                                            | -7.45844 | 0.00004 |
| A_24_P812265 | A_24_P812265 | Unknown                                                                                                                   | 5.37664  | 0.00045 |
| A_32_P171984 | A_32_P171984 | Unknown                                                                                                                   | 5.94952  | 0.00022 |
| XM_373367    | A_24_P401150 | Unknown                                                                                                                   | 4.88814  | 0.00086 |
| NM_030809    | C12orf22     | Chromosome 12 open reading frame 22                                                                                       | -6.26667 | 0.00015 |
| NM_001014436 | DBNL         | Drebrin-like                                                                                                              | 5.82723  | 0.00025 |

|              |                 |                                                                                                                      |          |         |
|--------------|-----------------|----------------------------------------------------------------------------------------------------------------------|----------|---------|
| NM_014774    | KIAA0494        | ATP synthase mitochondrial F1 complex assembly factor 1                                                              | 6.08021  | 0.00018 |
| NM_005482    | PIGK            | Phosphatidylinositol glycan anchor biosynthesis, class K                                                             | -6.21898 | 0.00016 |
| NM_174898    | LOC129530       | hypothetical protein LOC129530                                                                                       | -6.1107  | 0.00018 |
| NM_201434    | RAB5C           | RAB5C, member RAS oncogene family                                                                                    | 5.60187  | 0.00033 |
| AK095151     | EDD1            | E3 ubiquitin protein ligase, HECT domain containing, 1                                                               | -5.90406 | 0.00023 |
| NM_152409    | C5orf24         | Chromosome 5 open reading frame 24                                                                                   | 5.18137  | 0.00058 |
| A_24_P626812 | A_24_P626812    | Unknown                                                                                                              | 5.48701  | 0.00039 |
| NM_001521    | GTF3C2          | General transcription factor IIIC, polypeptide 2, beta 110kDa                                                        | -5.31194 | 0.00049 |
| NM_018116    | MSTO1           | Death associated protein 3                                                                                           | 5.70862  | 0.00029 |
| NM_031483    | ITCH            | Itchy homolog E3 ubiquitin protein ligase (mouse)                                                                    | -5.65809 | 0.00031 |
| NM_000982    | RPL21           | Ribosomal protein L21                                                                                                | -6.76771 | 0.00008 |
| NM_005692    | ABCF2           | ATP-binding cassette, sub-family F (GCN20), member 2                                                                 | 4.85315  | 0.0009  |
| NM_007249    | KLF12           | Kruppel-like factor 12                                                                                               | -5.04433 | 0.0007  |
| AK125099     | AK125099        | CDNA FLJ43109 fis, clone CTONG2025516, moderately similar to Homo sapiens general transcription factor II, i (GTF2I) | 6.01691  | 0.0002  |
| NM_203447    | DOCK8           | Dedicator of cytokinesis 8                                                                                           | -7.32816 | 0.00004 |
| BC020955     | TBC1D23         | TBC1 domain family, member 23                                                                                        | -6.35938 | 0.00013 |
| BC045820     | C21orf51        | Chromosome 21 open reading frame 51                                                                                  | -5.01304 | 0.00073 |
| AY831680     | HC1             | HC1 (HC1)                                                                                                            | -6.02551 | 0.0002  |
| NM_022894    | PAPOLG          | Poly(A) polymerase gamma                                                                                             | -7.18187 | 0.00005 |
| NM_018371    | ChGn            | chondroitin beta1,4 N-acetylgalactosaminyltransferase                                                                | 5.05306  | 0.00069 |
| A_32_P211048 | A_32_P211048    | Unknown                                                                                                              | -5.23129 | 0.00054 |
| NM_020235    | BBX             | Bobby sox homolog (Drosophila)                                                                                       | 5.65165  | 0.00031 |
| AL117511     | C14orf125       | Homo sapiens mRNA; cDNA DKFZp43411735 (from clone DKFZp43411735); partial cds.                                       | -5.13994 | 0.00061 |
| AK024925     | FLJ21272        | hypothetical protein FLJ21272                                                                                        | -5.11626 | 0.00063 |
| NM_021100    | NFS1            | NFS1 nitrogen fixation 1 homolog (S. cerevisiae)                                                                     | -6.4712  | 0.00012 |
| NM_006133    | C11orf11        | Chromosome 11 open reading frame 11                                                                                  | 6.22281  | 0.00015 |
| AL832861     | MTERF           | Mitochondrial transcription termination factor                                                                       | -6.82522 | 0.00008 |
| NM_199320    | PHF17           | PHD finger protein 17                                                                                                | -5.41371 | 0.00043 |
| NM_000982    | RPL21           | Ribosomal protein L21                                                                                                | -5.8857  | 0.00023 |
| NM_145233    | ZNF625          | Zinc finger protein 20                                                                                               | 5.42341  | 0.00042 |
| NM_032782    | HAVCR2          | Hepatitis A virus cellular receptor 2                                                                                | -5.54466 | 0.00036 |
| XM_497894    | A_24_P24912     | Unknown                                                                                                              | 5.83076  | 0.00025 |
| NM_015530    | GORASP2         | Golgi reassembly stacking protein 2, 55kDa                                                                           | 5.85766  | 0.00024 |
| NM_172241    | CTAGE1          | Cutaneous T-cell lymphoma-associated antigen 1                                                                       | 7.17695  | 0.00005 |
| AK001173     | AQR             | Aquarius homolog (mouse)                                                                                             | -7.77232 | 0.00003 |
| NM_001299    | CNN1            | Calponin 1, basic, smooth muscle                                                                                     | 5.51348  | 0.00037 |
| AB058774     | ZNF594          | Zinc finger protein 594                                                                                              | -5.7672  | 0.00027 |
| NM_001607    | ACAA1           | Acetyl-Coenzyme A acyltransferase 1 (peroxisomal 3-oxoacyl-Coenzyme A thiolase)                                      | 5.0508   | 0.00069 |
| NM_001005526 | SF3B1           | Splicing factor 3b, subunit 1, 155kDa                                                                                | 5.20139  | 0.00056 |
| NM_006241    | PPP1R2          | Protein phosphatase 1, regulatory (inhibitor) subunit 2                                                              | -5.25608 | 0.00052 |
| W18193       | THC2304444      | IMAGE:20064 Soares infant brain 1NIB Homo sapiens cDNA clone IMAGE:20064, mRNA sequence.                             | -5.51323 | 0.00037 |
| AK125922     | CSNK2A2         | Casein kinase 2, alpha prime polypeptide                                                                             | -7.4646  | 0.00004 |
| BU567832     | BU567832        | Transcribed locus                                                                                                    | -4.93845 | 0.0008  |
| NM_000791    | DHFR            | Dihydrofolate reductase                                                                                              | 4.95027  | 0.00079 |
| BC104478     | RPL21           | Ribosomal protein L21                                                                                                | -6.41461 | 0.00012 |
| NM_001040431 | CCDC56          | Coiled-coil domain containing 56                                                                                     | 5.15456  | 0.0006  |
| AJ420510     | PHF10           | PHD finger protein 10                                                                                                | -6.30643 | 0.00014 |
| BC011660     | BC011660        | Homo sapiens cDNA clone IMAGE:4120690, **** WARNING: chimeric clone ****.                                            | 5.70061  | 0.00029 |
| NM_025164    | KIAA0999        | KIAA0999 protein                                                                                                     | -6.08738 | 0.00018 |
| NM_006195    | PBX3            | Pre-B-cell leukemia transcription factor 3                                                                           | -6.5323  | 0.00011 |
| NM_014149    | HSPC049         | HSPC049 protein                                                                                                      | -5.65533 | 0.00031 |
| NM_018029    | FLJ10213        | hypothetical protein FLJ10213                                                                                        | -5.53682 | 0.00036 |
| XM_373538    | ENST00000344556 | Unknown                                                                                                              | 7.28826  | 0.00005 |
| THC2316878   | THC2316878      | Unknown                                                                                                              | -5.50095 | 0.00038 |
| NM_003634    | NIPSNAP1        | Nipsnap homolog 1 (C. elegans)                                                                                       | 5.96498  | 0.00021 |
| NM_153631    | HOXA3           | Homeobox A5                                                                                                          | 7.53786  | 0.00004 |
| THC2404993   | THC2404993      | Unknown                                                                                                              | -4.88629 | 0.00086 |
| NM_001008709 | PPP1CA          | Protein phosphatase 1, catalytic subunit, alpha isoform                                                              | 4.95731  | 0.00078 |
| NM_000889    | ITGB7           | Integrin, beta 7                                                                                                     | -5.0143  | 0.00072 |

|              |                 |                                                                                                  |          |         |
|--------------|-----------------|--------------------------------------------------------------------------------------------------|----------|---------|
| NM_014033    | METTL7A         | LETM1 domain containing 1                                                                        | -5.10185 | 0.00064 |
| NM_023926    | ZNF447          | Zinc finger protein 447                                                                          | 7.08335  | 0.00006 |
| NM_007139    | ZNF92           | Zinc finger protein 92                                                                           | -5.33052 | 0.00047 |
| NM_032645    | RAPSN           | Receptor-associated protein of the synapse, 43kD                                                 | 7.31724  | 0.00004 |
| AI299143     | LOC51255        | hypothetical protein LOC51255                                                                    | -6.62138 | 0.0001  |
| NM_014624    | S100A6          | S100 calcium binding protein A6                                                                  | 5.69194  | 0.0003  |
| NM_032837    | FAM104A         | Family with sequence similarity 104, member A                                                    | 7.10417  | 0.00006 |
| NM_005292    | GPR18           | G protein-coupled receptor 18                                                                    | -5.39734 | 0.00043 |
| AK001179     | ANKIB1          | Ankyrin repeat and IBR domain containing 1                                                       | 6.78686  | 0.00008 |
| AK097258     | DOK3            | Docking protein 3                                                                                | -6.21585 | 0.00016 |
| NM_175852    | TXLNA           | Taxilin alpha                                                                                    | 5.07701  | 0.00067 |
| NM_006231    | POLE            | Polymerase (DNA directed), epsilon                                                               | 5.3557   | 0.00046 |
| NM_015216    | HISPPD1         | Histidine acid phosphatase domain containing 1                                                   | -5.75216 | 0.00028 |
| NM_020400    | GPR92           | G protein-coupled receptor 92                                                                    | -6.72524 | 0.00009 |
| NM_020781    | ZNF398          | Zinc finger protein 398                                                                          | -6.47114 | 0.00012 |
| A_24_P632160 | A_24_P632160    | Unknown                                                                                          | 5.12173  | 0.00063 |
| NM_014224    | PGA5            | Pepsinogen 5, group I (pepsinogen A)                                                             | 5.1415   | 0.00061 |
| NM_014824    | FCHSD2          | FCH and double SH3 domains 2                                                                     | 7.01313  | 0.00006 |
| NM_015723    | PNPLA8          | Patatin-like phospholipase domain containing 8                                                   | 7.24769  | 0.00005 |
| AK001179     | ANKIB1          | Ankyrin repeat and IBR domain containing 1                                                       | -5.9491  | 0.00022 |
| AA420998     | LOC286076       | hypothetical protein LOC286076                                                                   | 5.31666  | 0.00048 |
| NM_033184    | KRTAP2-4        | Keratin associated protein 2-4                                                                   | 6.81809  | 0.00008 |
| NM_033481    | FBXO9           | F-box protein 9                                                                                  | -5.53612 | 0.00036 |
| NM_020964    | KIAA1632        | KIAA1632                                                                                         | -5.70799 | 0.00029 |
| NM_000405    | GM2A            | GM2 ganglioside activator                                                                        | 4.81139  | 0.00096 |
| NM_024713    | C15orf29        | Chromosome 15 open reading frame 29                                                              | 6.26529  | 0.00015 |
| NM_006620    | HBS1L           | HBS1-like (S. cerevisiae)                                                                        | -5.65177 | 0.00031 |
| NM_153353    | LRRC34          | Leucine rich repeat containing 34                                                                | -5.18522 | 0.00058 |
| NM_032271    | TRAF7           | TNF receptor-associated factor 7                                                                 | 5.42648  | 0.00042 |
| NM_002498    | NEK3            | NIMA (never in mitosis gene a)-related kinase 3                                                  | -6.56948 | 0.0001  |
| BQ188033     | EPB41L4A        | Erythrocyte membrane protein band 4.1 like 4A                                                    | -7.30113 | 0.00005 |
| AK025056     | ZYG11B          | Zyg-11 homolog B (C. elegans)                                                                    | -6.13158 | 0.00017 |
| AK126501     | CDC2L2          | Cell division cycle 2-like 2 (PITSLRE proteins)                                                  | -7.34404 | 0.00004 |
| NM_001945    | HBEGF           | Heparin-binding EGF-like growth factor                                                           | 5.29197  | 0.0005  |
| AK093505     | CXorf18         | SPANX family, member A2                                                                          | 7.21242  | 0.00005 |
| NM_022838    | ARMCX5          | G protein-coupled receptor associated sorting protein 2                                          | -6.83633 | 0.00008 |
| NM_002883    | RANGAP1         | Ran GTPase activating protein 1                                                                  | 5.21738  | 0.00055 |
| NM_018448    | CAND1           | Cullin-associated and neddylation-dissociated 1                                                  | 6.43506  | 0.00012 |
| NM_172193    | KLHDC1          | Kelch domain containing 1                                                                        | -4.97574 | 0.00076 |
| NM_002874    | RAD23B          | RAD23 homolog B (S. cerevisiae)                                                                  | 5.10293  | 0.00064 |
| NM_000402    | G6PD            | Glucose-6-phosphate dehydrogenase                                                                | 4.90285  | 0.00084 |
| NM_004665    | VNN2            | Vanin 2                                                                                          | -5.49775 | 0.00038 |
| AF111848     | PRO0529         | Homo sapiens PRO0529 mRNA, complete cds.                                                         | 7.2649   | 0.00005 |
| A_32_P83174  | A_32_P83174     | Unknown                                                                                          | -6.08174 | 0.00018 |
| BE044472     | C22orf27        | Chromosome 22 open reading frame 27                                                              | -6.12607 | 0.00017 |
| NM_001012754 | LOC387921       | similar to RIKEN cDNA 8030451K01                                                                 | -6.13156 | 0.00017 |
| NM_020382    | SETD8           | SET domain containing (lysine methyltransferase) 8                                               | 6.25922  | 0.00015 |
| NM_006313    | USP15           | Ubiquitin specific peptidase 15                                                                  | -5.27031 | 0.00051 |
| NM_004727    | SLC24A1         | Solute carrier family 24 (sodium/potassium/calcium exchanger), member 1                          | -5.58374 | 0.00034 |
| XM_371160    | ENST00000310822 | PREDICTED: Homo sapiens similar to ribosomal protein L21 isoform 1 (LOC388532), mRNA [XM_371160] | -6.21526 | 0.00016 |
| NM_004879    | EI24            | Etoposide induced 2.4 mRNA                                                                       | 4.81487  | 0.00095 |
| NM_018660    | ZNF395          | Zinc finger protein 395                                                                          | -6.76571 | 0.00008 |
| NM_005880    | DNAJA2          | DnaJ (Hsp40) homolog, subfamily A, member 2                                                      | 5.86414  | 0.00024 |
| NM_014017    | MAPBPIP         | mitogen-activated protein-binding protein-interacting protein                                    | 6.46094  | 0.00012 |
| NM_013339    | ALG6            | Asparagine-linked glycosylation 6 homolog (S. cerevisiae, alpha-1,3-glucosyltransferase)         | -5.2637  | 0.00052 |
| THC2375818   | THC2375818      | Q15464 (Q15464) Shb, partial (4%) [THC2375818]                                                   | 5.43053  | 0.00042 |
| NM_015227    | POFUT2          | Protein O-fucosyltransferase 2                                                                   | -5.82663 | 0.00025 |
| NM_018367    | PHCA            | Phytoceramidease, alkaline                                                                       | 5.4057   | 0.00043 |
| AK124515     | AK124515        | CDNA FLJ30141 fis, clone BRACE2000148                                                            | -5.80037 | 0.00026 |

|              |              |                                                                                                         |          |         |
|--------------|--------------|---------------------------------------------------------------------------------------------------------|----------|---------|
| AK025335     | AP1GBP1      | AP1 gamma subunit binding protein 1                                                                     | -6.17463 | 0.00016 |
| NM_145867    | LTC4S        | Leukotriene C4 synthase                                                                                 | 5.71862  | 0.00029 |
| A_24_P50707  | A_24_P50707  | Unknown                                                                                                 | -7.21616 | 0.00005 |
| NM_014990    | GARNL1       | GTPase activating Rap/RanGAP domain-like 1                                                              | -6.79782 | 0.00008 |
| NM_005803    | FLOT1        | Flotillin 1                                                                                             | 4.88546  | 0.00086 |
| NM_032230    | C12orf26     | Chromosome 12 open reading frame 26                                                                     | -5.72089 | 0.00029 |
| NM_000632    | ITGAM        | Integrin, alpha M (complement component 3 receptor 3 subunit)                                           | -6.173   | 0.00016 |
| AK125015     | MTHFSD       | Homo sapiens cDNA FLJ43025 fis, clone BRTHA2018707.                                                     | -6.19194 | 0.00016 |
| NM_003705    | SLC25A12     | Solute carrier family 25 (mitochondrial carrier, Aralar), member 12                                     | 5.56608  | 0.00035 |
| NM_032632    | PAPOLA       | Poly(A) polymerase alpha                                                                                | -6.93832 | 0.00007 |
| NM_007331    | WHSC1        | Wolf-Hirschhorn syndrome candidate 1                                                                    | -5.54554 | 0.00036 |
| BM711907     | THC2373429   | Transcribed locus                                                                                       | -5.5243  | 0.00037 |
| A_24_P264413 | A_24_P264413 | Unknown                                                                                                 | 4.86773  | 0.00089 |
| NM_032778    | MINA         | MYC induced nuclear antigen                                                                             | 5.1964   | 0.00057 |
| AK095260     | FLJ10769     | hypothetical protein FLJ10769                                                                           | 6.78238  | 0.00008 |
| NM_004930    | CAPZB        | Capping protein (actin filament) muscle Z-line, beta                                                    | 5.14986  | 0.0006  |
| NM_003951    | SLC25A14     | Solute carrier family 25 (mitochondrial carrier, brain), member 14                                      | -5.04853 | 0.00069 |
| NM_012108    | BRDG1        | BCR downstream signaling 1                                                                              | -5.17296 | 0.00058 |
| NM_000788    | DCK          | Deoxycytidine kinase                                                                                    | -6.25805 | 0.00015 |
| NM_019015    | CSGlcA-T     | chondroitin sulfate glucuronyltransferase                                                               | 5.53232  | 0.00036 |
| NM_001040150 | C15orf28     | Acidic (leucine-rich) nuclear phosphoprotein 32 family, member A                                        | -5.31078 | 0.00049 |
| NM_052839    | PANX2        | Pannexin 2                                                                                              | 5.81643  | 0.00025 |
| NM_001024732 | MECR         | Mitochondrial trans-2-enoyl-CoA reductase                                                               | 6.46046  | 0.00012 |
| NM_018949    | UTS2R        | Urotensin 2 receptor                                                                                    | 6.14462  | 0.00017 |
| NM_000786    | CYP51A1      | Cytochrome P450, family 51, subfamily A, polypeptide 1                                                  | -5.98488 | 0.00021 |
| NM_001361    | DHODH        | Dihydroorotate dehydrogenase                                                                            | -4.81064 | 0.00096 |
| THC2442489   | THC2442489   | Unknown                                                                                                 | -5.7987  | 0.00026 |
| AK024144     | FLJ14082     | hypothetical protein FLJ14082                                                                           | 5.0193   | 0.00072 |
| THC2315966   | THC2315966   | Unknown                                                                                                 | 5.44628  | 0.00041 |
| THC2279305   | THC2279305   | Unknown                                                                                                 | -6.62236 | 0.0001  |
| BG768878     | THC2312236   | 602743557F1 NIH_MGC_49 Homo sapiens cDNA clone IMAGE:4872878 5', mRNA sequence.                         | 5.64061  | 0.00032 |
| NM_001031735 | C19orf36     | Chromosome 19 open reading frame 36                                                                     | 5.29118  | 0.0005  |
| NM_001329    | CTBP2        | C-terminal binding protein 2                                                                            | 6.02499  | 0.0002  |
| NM_007372    | DDX42        | DEAD (Asp-Glu-Ala-Asp) box polypeptide 42                                                               | 5.48554  | 0.00039 |
| AF343078     | ATAD3B       | Homo sapiens TOB3 mRNA, complete cds.                                                                   | 5.06251  | 0.00068 |
| NM_001013842 | C8orf58      | Chromosome 8 open reading frame 58                                                                      | -5.24475 | 0.00053 |
| AV739735     | HNRPC        | Transcribed locus, moderately similar to NP_001020804.1 nuclear ribonucleoprotein C [Rattus norvegicus] | 5.62056  | 0.00033 |
| NM_002641    | PIGA         | Phosphatidylinositol glycan anchor biosynthesis, class A (paroxysmal nocturnal hemoglobinuria)          | -5.71759 | 0.00029 |
| NM_018047    | RBM22        | RNA binding motif protein 22                                                                            | 6.25385  | 0.00015 |
| NM_153187    | SLC22A1      | Solute carrier family 22 (organic cation transporter), member 1                                         | 5.05565  | 0.00069 |
| AK127081     | USP54        | Ubiquitin specific peptidase 54                                                                         | -6.40172 | 0.00013 |
| AK125832     | TBC1D3C      | TBC1 domain family, member 3C                                                                           | -5.35704 | 0.00046 |
| CR619110     | LOC401588    | hypothetical LOC401588                                                                                  | -5.72382 | 0.00029 |
| NM_003861    | WDR22        | WD repeat domain 22                                                                                     | -6.2627  | 0.00015 |
| NM_138363    | CCDC45       | Coiled-coil domain containing 45                                                                        | -4.87186 | 0.00088 |
| A_32_P55799  | A_32_P55799  | Unknown                                                                                                 | -5.05573 | 0.00068 |
| NM_014940    | MON1B        | MON1 homolog B (yeast)                                                                                  | 7.0631   | 0.00006 |
| BX648857     | SP3          | Sp3 transcription factor                                                                                | -5.68022 | 0.0003  |
| NM_006120    | HLA-DMA      | Major histocompatibility complex, class II, DM beta                                                     | -5.36711 | 0.00045 |
| NM_006669    | LILRB1       | Leukocyte immunoglobulin-like receptor, subfamily B (with TM and ITIM domains), member 1                | -6.90789 | 0.00007 |
| BQ189538     | THC2316936   | Transcribed locus                                                                                       | -5.01081 | 0.00073 |
| NM_015205    | ATP11A       | ATPase, Class VI, type 11A                                                                              | -6.56291 | 0.0001  |
| NM_138364    | LOC90826     | hypothetical protein BC004337                                                                           | -5.01733 | 0.00072 |
| BC089156     | BC089156     | Homo sapiens, clone IMAGE:4346533, mRNA                                                                 | -5.40338 | 0.00043 |
| A_24_P16273  | A_24_P16273  | Unknown                                                                                                 | 5.78523  | 0.00026 |
| CR606044     | LOC93622     | hypothetical protein BC006130                                                                           | -4.92763 | 0.00082 |
| NM_199044    | NSUN4        | NOL1/NOP2/Sun domain family, member 4                                                                   | 5.527    | 0.00037 |
| NM_000455    | STK11        | Serine/threonine kinase 11                                                                              | 6.37056  | 0.00013 |
| NM_173694    | ATP11C       | ATPase, Class VI, type 11C                                                                              | -6.79799 | 0.00008 |

|              |              |                                                                                                       |          |         |
|--------------|--------------|-------------------------------------------------------------------------------------------------------|----------|---------|
| NM_006962    | ZNF182       | Zinc finger protein 182                                                                               | -5.38748 | 0.00044 |
| BM680823     | BM680823     | Transcribed locus                                                                                     | -5.0325  | 0.00071 |
| BC053353     | PRPF38B      | CDNA clone IMAGE:5246408                                                                              | -5.95255 | 0.00021 |
| AB014514     | FLJ30092     | AF-1 specific protein phosphatase                                                                     | 6.40387  | 0.00012 |
| NM_001152    | SLC25A5      | Solute carrier family 25 (mitochondrial carrier; adenine nucleotide translocator), member 5           | 4.99296  | 0.00075 |
| BF213738     | CLEC2B       | C-type lectin domain family 2, member B                                                               | -6.15737 | 0.00017 |
| NM_025231    | ZNF435       | Zinc finger protein 435                                                                               | -6.70982 | 0.00009 |
| NM_001076786 | QSER1        | Glutamine and serine rich 1                                                                           | -5.86969 | 0.00024 |
| NM_019007    | ARMCX6       | Armadillo repeat containing, X-linked 6                                                               | -5.98809 | 0.00021 |
| NM_145911    | ZNF23        | Ribosomal protein L27                                                                                 | -6.73374 | 0.00009 |
| NM_024819    | DCAKD        | Dephospho-CoA kinase domain containing                                                                | -4.9368  | 0.00081 |
| NM_005207    | CRKL         | V-crk sarcoma virus CT10 oncogene homolog (avian)-like                                                | 5.38662  | 0.00044 |
| NM_175736    | FMNL3        | Formin-like 3                                                                                         | 5.60824  | 0.00033 |
| NM_017794    | KIAA1797     | KIAA1797                                                                                              | -5.35919 | 0.00046 |
| NM_004074    | COX8A        | Cytochrome c oxidase subunit 8A (ubiquitous)                                                          | 6.05767  | 0.00019 |
| AF144054     | AF144054     | Apoptosis related protein APR-4                                                                       | 6.06285  | 0.00019 |
| THC2344420   | THC2344420   | ALU7_HUMAN (P39194) Alu subfamily SQ sequence contamination warning entry, partial (21%) [THC2344420] | -5.13064 | 0.00062 |
| AF229166     | LOC220077    | hypothetical gene supported by AF229166                                                               | 5.41636  | 0.00042 |
| AB014550     | SMCHD1       | Structural maintenance of chromosomes flexible hinge domain containing 1                              | -6.90178 | 0.00007 |
| NM_024738    | C12orf49     | Chromosome 12 open reading frame 49                                                                   | 5.44473  | 0.00041 |
| NM_153649    | TPM3         | Tropomyosin 3                                                                                         | 5.58209  | 0.00034 |
| NM_012247    | SEPHS1       | Selenophosphate synthetase 1                                                                          | 4.8008   | 0.00097 |
| NM_014339    | IL17RA       | Interleukin 17 receptor A                                                                             | -4.86703 | 0.00089 |
| NM_000534    | PMS1         | PMS1 postmeiotic segregation increased 1 (S. cerevisiae)                                              | -5.93393 | 0.00022 |
| AL832783     | LMLN         | Leishmanolysin-like (metallopeptidase M8 family)                                                      | -4.79121 | 0.00099 |
| NM_015525    | IBTK         | Inhibitor of Bruton agammaglobulinemia tyrosine kinase                                                | -6.3151  | 0.00014 |
| A_32_P77421  | A_32_P77421  | Unknown                                                                                               | -6.30639 | 0.00014 |
| NM_019843    | EIF4ENIF1    | Eukaryotic translation initiation factor 4E nuclear import factor 1                                   | -6.83768 | 0.00008 |
| NM_024898    | DENND1C      | DENN/MADD domain containing 1C                                                                        | -6.91959 | 0.00007 |
| NM_172217    | IL16         | Interleukin 16 (lymphocyte chemoattractant factor)                                                    | -5.28949 | 0.0005  |
| NM_001192    | TNFRSF17     | Tumor necrosis factor receptor superfamily, member 17                                                 | -6.95798 | 0.00007 |
| NM_001010853 | ACY1L2       | Aminoacylase 1-like 2                                                                                 | -6.81869 | 0.00008 |
| THC2428671   | THC2428671   | Unknown                                                                                               | -6.52112 | 0.00011 |
| NM_004423    | DVL3         | Dishevelled, dsh homolog 3 (Drosophila)                                                               | 5.46922  | 0.0004  |
| BC040695     | WBSCR16      | Williams-Beuren syndrome chromosome region 16                                                         | -5.70567 | 0.00029 |
| A_24_P418590 | A_24_P418590 | Unknown                                                                                               | -5.20758 | 0.00056 |
| NM_001018062 | LOC51149     | hypothetical LOC51149                                                                                 | -4.88888 | 0.00086 |
| NM_017869    | BANP         | BTG3 associated nuclear protein                                                                       | 5.46398  | 0.0004  |
| D86980       | TTC9         | Tetratricopeptide repeat domain 9                                                                     | -5.47605 | 0.00039 |
| A_24_P333077 | A_24_P333077 | Unknown                                                                                               | 5.92063  | 0.00022 |
| NM_001556    | IKBKB        | Golgi autoantigen, golgin subfamily a, 7                                                              | -6.58675 | 0.0001  |
| NM_001008225 | CNOT4        | CCR4-NOT transcription complex, subunit 4                                                             | 4.9542   | 0.00079 |
| NM_021173    | POLD4        | Polymerase (DNA-directed), delta 4                                                                    | 5.57566  | 0.00034 |
| NM_031303    | KATNAL2      | Katanin p60 subunit A-like 2                                                                          | -6.56838 | 0.0001  |
| NM_007234    | DCTN3        | Dynactin 3 (p22)                                                                                      | 5.07507  | 0.00067 |
| NM_022845    | CBFB         | Core-binding factor, beta subunit                                                                     | 6.17287  | 0.00016 |
| XM_167254    | LOC402643    | PREDICTED: Homo sapiens similar to tropomyosin 3 isoform 2 (LOC402643), mRNA [XM_167254]              | 4.89622  | 0.00085 |
| NM_032868    | FLJ14981     | hypothetical protein FLJ14981                                                                         | 5.68109  | 0.0003  |
| NM_013296    | GPSM2        | G-protein signalling modulator 2 (AGS3-like, C. elegans)                                              | 5.72586  | 0.00028 |
| NM_006134    | TMEM50B      | Transmembrane protein 50B                                                                             | 6.77942  | 0.00008 |
| NM_001781    | CD69         | CD69 molecule                                                                                         | -5.92149 | 0.00022 |
| NM_021818    | SAV1         | Salvador homolog 1 (Drosophila)                                                                       | -5.9986  | 0.0002  |
| NM_174913    | C14orf21     | Cell death-inducing DFFA-like effector b                                                              | 6.12658  | 0.00017 |
| NM_013943    | CLIC4        | Chloride intracellular channel 4                                                                      | 5.03541  | 0.0007  |
| NM_003161    | RPS6KB1      | Ribosomal protein S6 kinase, 70kDa, polypeptide 1                                                     | -5.92216 | 0.00022 |
| NM_153649    | TPM3         | Tropomyosin 3                                                                                         | -6.5978  | 0.0001  |
| NM_198040    | PHC2         | Polyhomeotic homolog 2 (Drosophila)                                                                   | 6.49653  | 0.00011 |
| NM_014766    | SCRN1        | Secernin 1                                                                                            | -5.9542  | 0.00021 |
| X78926       | ZNF268       | Phosphatidylinositol glycan anchor biosynthesis, class F                                              | -6.26836 | 0.00015 |

|              |              |                                                                                                              |          |         |
|--------------|--------------|--------------------------------------------------------------------------------------------------------------|----------|---------|
| NM_005051    | QARS         | Glutamyl-tRNA synthetase                                                                                     | 5.02506  | 0.00071 |
| NM_032272    | MAF1         | MAF1 homolog (S. cerevisiae)                                                                                 | 5.03895  | 0.0007  |
| NM_178862    | STT3B        | STT3, subunit of the oligosaccharyltransferase complex, homolog B (S. cerevisiae)                            | 5.53837  | 0.00036 |
| NM_031157    | HNRPA1       | Heterogeneous nuclear ribonucleoprotein A1                                                                   | -5.34903 | 0.00046 |
| BC018676     | LOC730846    | similar to S-adenosylmethionine decarboxylase proenzyme 2 (AdoMetDC 2) (SamDC 2)                             | 6.02167  | 0.0002  |
| NM_015251    | ASCIZ        | ATM/ATR-Substrate Chk2-Interacting Zn2+-finger protein                                                       | -4.91078 | 0.00084 |
| NM_024557    | RIC3         | Resistance to inhibitors of cholinesterase 3 homolog (C. elegans)                                            | -5.18745 | 0.00057 |
| NM_005389    | PCMT1        | Protein-L-isoaspartate (D-aspartate) O-methyltransferase                                                     | 4.80631  | 0.00097 |
| AK056402     | TDRKH        | Tudor and KH domain containing                                                                               | -5.98927 | 0.00021 |
| BX113895     | BX113895     | Transcribed locus                                                                                            | -5.24899 | 0.00053 |
| NM_199418    | PRCP         | Prolylcarboxypeptidase (angiotensinase C)                                                                    | -6.17688 | 0.00016 |
| NM_022074    | FAM111A      | Family with sequence similarity 111, member A                                                                | -6.19018 | 0.00016 |
| NM_032826    | SLC35B4      | Solute carrier family 35, member B4                                                                          | 5.93208  | 0.00022 |
| AK024473     | LOC92017     | similar to RIKEN cDNA 4933437K13                                                                             | -6.33059 | 0.00014 |
| NM_002766    | PRPSAP1      | Phosphoribosyl pyrophosphate synthetase-associated protein 1                                                 | -5.41712 | 0.00042 |
| NM_006052    | DSCR3        | Down syndrome critical region gene 3                                                                         | 5.6984   | 0.00029 |
| CR603982     | SESN3        | MRNA; cDNA DKFZp313B1017 (from clone DKFZp313B1017)                                                          | -5.53487 | 0.00036 |
| NM_015509    | NECAP1       | NECAP endocytosis associated 1                                                                               | 5.46732  | 0.0004  |
| BC047412     | ZNF433       | Zinc finger protein 433                                                                                      | -6.47114 | 0.00012 |
| NM_198829    | RAC1         | Ras-related C3 botulinum toxin substrate 1 (rho family, small GTP binding protein Rac1)                      | 5.72007  | 0.00029 |
| NM_018191    | RCBTB1       | Regulator of chromosome condensation (RCC1) and BTB (POZ) domain containing protein 1                        | -6.58896 | 0.0001  |
| NM_002075    | GNB3         | Guanine nucleotide binding protein (G protein), beta polypeptide 3                                           | 5.91288  | 0.00023 |
| NM_012164    | FBXW2        | Homo sapiens F-box and WD repeat domain containing 2 (FBXW2), mRNA.                                          | 4.83277  | 0.00093 |
| A_32_P163472 | A_32_P163472 | Unknown                                                                                                      | -6.16132 | 0.00017 |
| NM_015365    | AMMECR1      | Alport syndrome, mental retardation, midface hypoplasia and elliptocytosis chromosomal region, gene 1        | -5.71868 | 0.00029 |
| AI887037     | AI887037     | Transcribed locus, weakly similar to NP_114185.2 Y-box protein YB2 [Rattus norvegicus]                       | 5.73536  | 0.00028 |
| NM_003913    | PRPF4B       | PRP4 pre-mRNA processing factor 4 homolog B (yeast)                                                          | -6.5001  | 0.00011 |
| NM_018981    | DNAJC10      | DnaJ (Hsp40) homolog, subfamily C, member 10                                                                 | -5.57747 | 0.00034 |
| NM_000904    | NQO2         | NAD(P)H dehydrogenase, quinone 2                                                                             | 5.15535  | 0.0006  |
| AK123940     | FAM76A       | CDNA FLJ41946 fis, clone PLACE6019701                                                                        | -5.47561 | 0.00039 |
| NM_005254    | GABPB2       | GA binding protein transcription factor, beta subunit 2                                                      | -5.57953 | 0.00034 |
| A_23_P21804  | A_23_P21804  | Unknown                                                                                                      | -5.00709 | 0.00073 |
| BC071966     | FAM60A       | Family with sequence similarity 60, member A                                                                 | 5.73366  | 0.00028 |
| U52054       | EMB          | S6 H-8 mRNA expressed in chromosome 6-suppressed melanoma cells                                              | -6.50457 | 0.00011 |
| NM_005463    | HNRPDL       | Homo sapiens heterogeneous nuclear ribonucleoprotein D-like (HNRPDL), transcript variant 1, mRNA [NM_005463] | -6.07265 | 0.00019 |
| NM_152729    | NT5DC1       | 5'-nucleotidase domain containing 1                                                                          | -5.41419 | 0.00043 |
| NM_032775    | KLHL22       | Kelch-like 22 (Drosophila)                                                                                   | 5.32193  | 0.00048 |
| A_32_P177097 | A_32_P177097 | Unknown                                                                                                      | -5.55856 | 0.00035 |
| THC2400533   | THC2400533   | Unknown                                                                                                      | -6.2533  | 0.00015 |
| NM_005877    | SF3A1        | Splicing factor 3a, subunit 1, 120kDa                                                                        | -4.80231 | 0.00097 |
| NM_001008392 | CTDSPL       | CTD (carboxy-terminal domain, RNA polymerase II, polypeptide A) small phosphatase-like                       | 5.07055  | 0.00067 |
| NM_015914    | TXNDC11      | Thioredoxin domain containing 11                                                                             | -5.91849 | 0.00022 |
| NM_025040    | ZNF614       | Zinc finger protein 614                                                                                      | 5.42227  | 0.00042 |
| AF067420     | IGHA1        | Immunoglobulin heavy constant alpha 1                                                                        | 5.36829  | 0.00045 |
| BF592096     | RPL22        | Ribosomal protein L22                                                                                        | -4.87536 | 0.00088 |
| XM_931434    | LOC400027    | hypothetical gene supported by BC047417                                                                      | -5.55031 | 0.00036 |
| NM_004124    | GMFB         | Glia maturation factor, beta                                                                                 | 5.74047  | 0.00028 |
| NM_003932    | ST13         | Suppression of tumorigenicity 13 (colon carcinoma) (Hsp70 interacting protein)                               | 6.04059  | 0.00019 |
| NM_014341    | MTCH1        | Mitochondrial carrier homolog 1 (C. elegans)                                                                 | -6.36315 | 0.00013 |
| NM_002494    | NDUFC1       | NADH dehydrogenase (ubiquinone) 1, subcomplex unknown, 1, 6kDa                                               | -5.97566 | 0.00021 |
| NM_194324    | MGC39900     | hypothetical protein MGC39900                                                                                | -5.2886  | 0.0005  |
| BX118285     | LOC729717    | hypothetical protein LOC729717                                                                               | -6.00778 | 0.0002  |
| NM_017615    | NSMCE4A      | Non-SMC element 4 homolog A (S. cerevisiae)                                                                  | 5.78582  | 0.00026 |
| NM_178354    | LCE1F        | Late cornified envelope 1F                                                                                   | 5.95595  | 0.00021 |
| NM_006699    | MAN1A2       | Mannosidase, alpha, class 1A, member 2                                                                       | 5.92092  | 0.00022 |
| NM_015245    | ANKS1A       | Ankyrin repeat and sterile alpha motif domain containing 1A                                                  | -5.50607 | 0.00038 |
| NM_018714    | COG1         | Component of oligomeric golgi complex 1                                                                      | -5.45574 | 0.0004  |
| NM_032730    | RTN4IP1      | Reticulon 4 interacting protein 1                                                                            | -6.07719 | 0.00018 |
| BX647358     | LOC283970    | hypothetical protein LOC283970                                                                               | -6.36374 | 0.00013 |

|              |              |                                                                                                                     |          |         |
|--------------|--------------|---------------------------------------------------------------------------------------------------------------------|----------|---------|
| NM_005171    | ATF1         | Activating transcription factor 1                                                                                   | 4.79615  | 0.00098 |
| NM_006537    | USP3         | Ubiquitin specific peptidase 3                                                                                      | 5.28511  | 0.0005  |
| NM_020764    | CASKIN1      | CASK interacting protein 1                                                                                          | 5.90091  | 0.00023 |
| XM_929707    | LOC646756    | similar to Hermansky-Pudlak syndrome 1 protein isoform b                                                            | 6.01252  | 0.0002  |
| NM_016025    | METTL9       | Methyltransferase like 9                                                                                            | -5.30304 | 0.00049 |
| NM_014718    | CLSTN3       | Calsyntenin 3                                                                                                       | 5.55953  | 0.00035 |
| NM_016220    | ZNF588       | Zinc finger protein 588                                                                                             | -6.08105 | 0.00018 |
| NM_152391    | PQLC3        | PQ loop repeat containing 3                                                                                         | -5.42606 | 0.00042 |
| NM_005093    | CBFA2T2      | Core-binding factor, runt domain, alpha subunit 2; translocated to, 2                                               | -4.93458 | 0.00081 |
| NM_003132    | SRM          | Spermidine synthase                                                                                                 | 6.26425  | 0.00015 |
| AB075859     | ZNF525       | Zinc finger protein 525                                                                                             | -6.0377  | 0.00019 |
| NM_012133    | COPG2        | Coatomer protein complex, subunit gamma 2                                                                           | -5.60169 | 0.00033 |
| NM_015391    | ANAPC13      | Anaphase promoting complex subunit 13                                                                               | 5.88569  | 0.00023 |
| NM_007279    | U2AF2        | U2 small nuclear RNA auxiliary factor 2                                                                             | 6.28623  | 0.00014 |
| NM_181657    | LTB4R        | Leukotriene B4 receptor                                                                                             | 6.31112  | 0.00014 |
| BC049371     | HERPUD2      | HERPUD family member 2                                                                                              | -5.4236  | 0.00042 |
| NM_024865    | NANOG        | Nanog homeobox                                                                                                      | -4.86843 | 0.00089 |
| NM_015366    | PRR5         | Proline rich 5 (renal)                                                                                              | 5.66776  | 0.00031 |
| NM_003161    | RPS6KB1      | Ribosomal protein S6 kinase, 70kDa, polypeptide 1                                                                   | -5.22779 | 0.00054 |
| NM_007186    | CEP250       | Centrosomal protein 250kDa                                                                                          | -5.15592 | 0.0006  |
| AI241366     | AI241366     | Transcribed locus                                                                                                   | -5.77357 | 0.00027 |
| NM_018660    | ZNF395       | Zinc finger protein 395                                                                                             | -5.96506 | 0.00021 |
| NM_006352    | ZNF238       | Zinc finger protein 238                                                                                             | 5.02507  | 0.00071 |
| NM_032199    | ARID5B       | AT rich interactive domain 5B (MRF1-like)                                                                           | -5.49226 | 0.00038 |
| NM_001184    | ATR          | Ataxia telangiectasia and Rad3 related                                                                              | -6.35054 | 0.00013 |
| NM_203448    | MGC21881     | hypothetical protein MGC21881                                                                                       | -5.36318 | 0.00045 |
| NM_015584    | POLDIP2      | Polymerase (DNA-directed), delta interacting protein 2                                                              | -5.75051 | 0.00028 |
| A_24_P315644 | A_24_P315644 | Unknown                                                                                                             | 5.15013  | 0.0006  |
| NM_014679    | CEP57        | Centrosomal protein 57kDa                                                                                           | -6.20966 | 0.00016 |
| NM_030776    | ZBP1         | Z-DNA binding protein 1                                                                                             | -5.73526 | 0.00028 |
| A_24_P684274 | A_24_P684274 | Unknown                                                                                                             | 6.05786  | 0.00019 |
| NM_013347    | RPA4         | Diaphanous homolog 2 (Drosophila)                                                                                   | -5.34338 | 0.00047 |
| NM_000028    | AGL          | Amylo-1, 6-glucosidase, 4-alpha-glucanotransferase (glycogen debranching enzyme, glycogen storage disease type III) | -5.88724 | 0.00023 |
| NM_005544    | IRS1         | Insulin receptor substrate 1                                                                                        | -5.99343 | 0.0002  |
| NM_017890    | VPS13B       | Vacuolar protein sorting 13B (yeast)                                                                                | -5.26169 | 0.00052 |
| NM_003925    | MBD4         | Methyl-CpG binding domain protein 4                                                                                 | -6.08677 | 0.00018 |
| NM_194278    | C14orf43     | Chromosome 14 open reading frame 43                                                                                 | -6.1667  | 0.00017 |
| NM_013450    | BAZ2B        | Bromodomain adjacent to zinc finger domain, 2B                                                                      | -6.24334 | 0.00015 |
| NM_002120    | HLA-DOB      | Homo sapiens major histocompatibility complex, class II, DO beta (HLA-DOB), mRNA.                                   | -5.22613 | 0.00054 |
| AK075364     | SLC10A7      | Chromosome 4 open reading frame 13                                                                                  | -6.08302 | 0.00018 |
| AL390214     | TRIO         | Triple functional domain (PTPRF interacting)                                                                        | -5.41553 | 0.00042 |
| NM_033535    | FBXL5        | F-box and leucine-rich repeat protein 5                                                                             | -5.47671 | 0.00039 |
| A_24_P234871 | A_24_P234871 | Unknown                                                                                                             | -5.18812 | 0.00057 |
| NM_017846    | TRSPAP1      | TRNA selenocysteine associated protein 1                                                                            | -4.89339 | 0.00086 |
| NM_203304    | RKHD1        | Ring finger and KH domain containing 1                                                                              | 5.65882  | 0.00031 |
| NM_016824    | ADD3         | Adducin 3 (gamma)                                                                                                   | -6.2579  | 0.00015 |
| NM_012089    | ABCB10       | ATP-binding cassette, sub-family B (MDR/TAP), member 10                                                             | -5.17797 | 0.00058 |
| NM_054028    | AMAC1L2      | Acyl-malonyl condensing enzyme 1-like 2                                                                             | -6.13479 | 0.00017 |
| THC2405550   | THC2405550   | Unknown                                                                                                             | -5.82626 | 0.00025 |
| NM_013314    | BLNK         | B-cell linker                                                                                                       | -6.15231 | 0.00017 |
| NM_001424    | EMP2         | Epithelial membrane protein 2                                                                                       | 5.01766  | 0.00072 |
| NM_032932    | RAB11FIP4    | RAB11 family interacting protein 4 (class II)                                                                       | -5.21617 | 0.00055 |
| BC036626     | SEN5         | SUMO1/sentrin specific peptidase 5                                                                                  | -6.1731  | 0.00016 |
| NM_014300    | SEC11A       | SEC11 homolog A (S. cerevisiae)                                                                                     | -5.51732 | 0.00037 |
| NM_032444    | BTBD12       | BTB (POZ) domain containing 12                                                                                      | -5.94585 | 0.00022 |
| NM_002795    | PSMB3        | Proteasome (prosome, macropain) subunit, beta type, 3                                                               | 5.01349  | 0.00073 |
| A_24_P609932 | A_24_P609932 | Unknown                                                                                                             | 5.95203  | 0.00021 |
| NM_198868    | TBC1D9B      | TBC1 domain family, member 9B (with GRAM domain)                                                                    | -5.14293 | 0.00061 |
| NM_015272    | KIAA1005     | KIAA1005 protein                                                                                                    | -5.38264 | 0.00044 |



|              |              |                                                                                                                                           |          |         |
|--------------|--------------|-------------------------------------------------------------------------------------------------------------------------------------------|----------|---------|
| XM_496158    | A_24_P341126 | Unknown                                                                                                                                   | 4.80149  | 0.00097 |
| NM_006099    | PIAS3        | Protein inhibitor of activated STAT, 3                                                                                                    | 5.57718  | 0.00034 |
| A_24_P126902 | A_24_P126902 | Unknown                                                                                                                                   | -5.90443 | 0.00023 |
| XM_930744    | LOC653056    | PREDICTED: Homo sapiens similar to hypothetical gene supported by AK024248; AL137733, transcript variant 12 (LOC653056), mRNA [XM_930744] | 5.61483  | 0.00033 |
| NM_032199    | ARID5B       | AT rich interactive domain 5B (MRF1-like)                                                                                                 | 5.09208  | 0.00065 |
| AF318367     | C9orf86      | Homo sapiens pp8875 mRNA, complete cds.                                                                                                   | 4.89882  | 0.00085 |
| NM_001969    | EIF5         | Eukaryotic translation initiation factor 5                                                                                                | -6.21026 | 0.00016 |
| CN404647     | CCDC18       | Coiled-coil domain containing 18                                                                                                          | -5.25271 | 0.00053 |
| NM_004894    | C14orf2      | Chromosome 14 open reading frame 2                                                                                                        | -5.8179  | 0.00025 |
| NM_152458    | ZNF785       | Zinc finger protein 785                                                                                                                   | -6.19706 | 0.00016 |
| NM_153816    | SNX14        | Sorting nexin 14                                                                                                                          | -4.95674 | 0.00078 |
| NM_024783    | AGBL2        | ATP/GTP binding protein-like 2                                                                                                            | -5.29806 | 0.0005  |
| NM_003342    | UBE2G1       | Ubiquitin-conjugating enzyme E2G 1 (UBC7 homolog, yeast)                                                                                  | 5.20823  | 0.00056 |
| AK129584     | AK129584     | Full-length cDNA clone CS0DI007YH13 of Placenta Cot 25-normalized of Homo sapiens (human)                                                 | 5.90722  | 0.00023 |
| NM_012089    | ABCB10       | ATP-binding cassette, sub-family B (MDR/TAP), member 10                                                                                   | -5.38255 | 0.00044 |
| NM_052873    | C14orf179    | Chromosome 14 open reading frame 179                                                                                                      | 5.93542  | 0.00022 |
| NM_152500    | CCDC17       | Coiled-coil domain containing 17                                                                                                          | -5.39547 | 0.00044 |
| NM_001040138 | CKLF         | Chemokine-like factor                                                                                                                     | -5.93626 | 0.00022 |
| AK022223     | DCAKD        | Dephospho-CoA kinase domain containing                                                                                                    | -5.27457 | 0.00051 |
| NM_014314    | DDX58        | DEAD (Asp-Glu-Ala-Asp) box polypeptide 58                                                                                                 | -6.10636 | 0.00018 |
| NM_003938    | AP3D1        | Adaptor-related protein complex 3, delta 1 subunit                                                                                        | 6.20295  | 0.00016 |
| BC035854     | DSCR1L2      | Down syndrome critical region gene 1-like 2                                                                                               | -5.19219 | 0.00057 |
| NM_015342    | PPWD1        | Peptidylprolyl isomerase domain and WD repeat containing 1                                                                                | -5.06668 | 0.00067 |
| NM_175876    | EXOC8        | Exocyst complex component 8                                                                                                               | -5.67475 | 0.0003  |
| NM_033557    | YIF1B        | Yip1 interacting factor homolog B (S. cerevisiae)                                                                                         | 4.88311  | 0.00087 |
| NM_002470    | MYH3         | Myosin, heavy chain 3, skeletal muscle, embryonic                                                                                         | -5.68484 | 0.0003  |
| NM_178126    | LOC162427    | hypothetical protein LOC162427                                                                                                            | 5.77981  | 0.00027 |
| BG007597     | ALKBH5       | Transcribed locus, strongly similar to NP_060228.2 protein LOC54890 [Homo sapiens]                                                        | 5.35565  | 0.00046 |
| NM_003982    | SLC7A7       | Solute carrier family 7 (cationic amino acid transporter, y+ system), member 7                                                            | -5.53607 | 0.00036 |
| NM_001326    | GSTF3        | Cleavage stimulation factor, 3' pre-RNA, subunit 3, 77kDa                                                                                 | -6.14277 | 0.00017 |
| U97060       | SNAI2        | Snail homolog 2 (Drosophila)                                                                                                              | 5.73829  | 0.00028 |
| NM_006640    |              | 9-Sep Septin 9                                                                                                                            | -5.35521 | 0.00046 |
| NM_025139    | ARMC9        | Armadillo repeat containing 9                                                                                                             | 5.18952  | 0.00057 |
| NM_006996    | SLC19A2      | Solute carrier family 19 (thiamine transporter), member 2                                                                                 | -5.95859 | 0.00021 |
| NM_014501    | UBE2S        | Ubiquitin-conjugating enzyme E2S                                                                                                          | 5.46013  | 0.0004  |
| NM_016184    | CLEC4A       | C-type lectin domain family 4, member A                                                                                                   | -6.07896 | 0.00018 |
| NM_020470    | YIF1A        | Yip1 interacting factor homolog A (S. cerevisiae)                                                                                         | 5.81837  | 0.00025 |
| NM_005922    | MAP3K4       | Mitogen-activated protein kinase kinase kinase 4                                                                                          | -5.64318 | 0.00032 |
| S74620       | PRKCH        | Protein kinase C, eta                                                                                                                     | 5.30026  | 0.00049 |
| A_32_P62137  | A_32_P62137  | Unknown                                                                                                                                   | 5.50854  | 0.00038 |
| L08436       | COTL1        | Coactosin-like 1 (Dictyostelium)                                                                                                          | -6.03708 | 0.00019 |
| NM_172345    | SPAG9        | Sperm associated antigen 9                                                                                                                | 5.40408  | 0.00043 |
| NM_003119    | SPG7         | Spastic paraplegia 7, paraplegin (pure and complicated autosomal recessive)                                                               | 4.91896  | 0.00083 |
| AK128396     | TRAF6        | CDNA FLJ46539 fis, clone THYMU3037836                                                                                                     | -4.9648  | 0.00078 |
| NM_014480    | ZNF544       | Zinc finger protein 544                                                                                                                   | -5.52426 | 0.00037 |
| NM_024050    | C19orf58     | Chromosome 19 open reading frame 58                                                                                                       | 5.81018  | 0.00026 |
| NM_014017    | MAPBPIP      | mitogen-activated protein-binding protein-interacting protein                                                                             | 5.65193  | 0.00031 |
| NM_018952    | HOXB6        | Homeobox B5                                                                                                                               | 4.78253  | 0.001   |
| AL832683     | PTAR1        | Protein prenyltransferase alpha subunit repeat containing 1                                                                               | -5.18786 | 0.00057 |
| NM_024812    | BAALC        | Brain and acute leukemia, cytoplasmic                                                                                                     | 5.29334  | 0.0005  |
| XM_496043    | A_24_P761457 | Unknown                                                                                                                                   | 4.99333  | 0.00075 |
| BX538300     | MRPS30       | Full-length cDNA clone CS0DK012YA15 of HeLa cells Cot 25-normalized of Homo sapiens (human)                                               | 5.38356  | 0.00044 |
| NM_145309    | LRRC51       | Leucine rich repeat containing 51                                                                                                         | 5.71612  | 0.00029 |
| NM_005647    | TBL1X        | Transducin (beta)-like 1X-linked                                                                                                          | -5.4274  | 0.00042 |
| NM_006788    | RALBP1       | RalA binding protein 1                                                                                                                    | 5.44876  | 0.00041 |
| NM_000982    | RPL21        | Ribosomal protein L21                                                                                                                     | -4.85896 | 0.0009  |
| CR590530     | PIP5K2B      | Phosphatidylinositol-4-phosphate 5-kinase, type II, beta                                                                                  | -5.90778 | 0.00023 |
| NM_006135    | CAPZA1       | Capping protein (actin filament) muscle Z-line, alpha 1                                                                                   | 5.48417  | 0.00039 |
| NM_198490    | RAB43        | RAB43, member RAS oncogene family                                                                                                         | -5.83049 | 0.00025 |

|              |                 |                                                                                                                           |          |         |
|--------------|-----------------|---------------------------------------------------------------------------------------------------------------------------|----------|---------|
| BM461836     | BM461836        | Transcribed locus                                                                                                         | -6.01488 | 0.0002  |
| AK022479     | HDHD1A          | Haloacid dehalogenase-like hydrolase domain containing 1A                                                                 | -5.47807 | 0.00039 |
| AL832806     | HDAC4           | Histone deacetylase 4                                                                                                     | -5.80606 | 0.00026 |
| BC021898     | AP1S3           | Homo sapiens adaptor-related protein complex 1, sigma 3 subunit, mRNA (cDNA clone MGC:17284 IMAGE:4340257), complete cds. | 5.33898  | 0.00047 |
| NM_001991    | EZH1            | Enhancer of zeste homolog 1 (Drosophila)                                                                                  | -5.85304 | 0.00024 |
| NM_033222    | PSIP1           | PC4 and SFRS1 interacting protein 1                                                                                       | -5.29831 | 0.00049 |
| NM_182538    | MGC29671        | hypothetical protein MGC29671                                                                                             | 5.11574  | 0.00063 |
| NM_002055    | GFAP            | Glial fibrillary acidic protein                                                                                           | 5.4633   | 0.0004  |
| NM_004552    | NDUFS5          | NADH dehydrogenase (ubiquinone) Fe-S protein 5, 15kDa (NADH-coenzyme Q reductase)                                         | -5.31081 | 0.00049 |
| AB011149     | KIAA0577        | Homo sapiens mRNA for KIAA0577 protein, partial cds.                                                                      | -5.56005 | 0.00035 |
| AK098220     | LOC728555       | hypothetical protein LOC728555                                                                                            | -5.66434 | 0.00031 |
| NM_199168    | CXCL12          | Chemokine (C-X-C motif) ligand 12 (stromal cell-derived factor 1)                                                         | 5.36752  | 0.00045 |
| XM_001134097 | LOC731989       | similar to protein tyrosine phosphatase 4a1                                                                               | 5.88768  | 0.00023 |
| NM_021140    | UTX             | Ubiquitously transcribed tetratricopeptide repeat, X chromosome                                                           | -5.36566 | 0.00045 |
| NM_001032410 | USP16           | Ubiquitin specific peptidase 16                                                                                           | -5.39423 | 0.00044 |
| NM_031206    | LAS1L           | LAS1-like (S. cerevisiae)                                                                                                 | -5.31002 | 0.00049 |
| NM_032750    | ABHD14B         | Abhydrolase domain containing 14B                                                                                         | 4.95275  | 0.00079 |
| NM_013375    | ABT1            | Activator of basal transcription 1                                                                                        | -5.94292 | 0.00022 |
| NM_178831    | GATS            | opposite strand transcription unit to STAG3                                                                               | 5.62774  | 0.00032 |
| NM_138426    | GLCCI1          | Glucocorticoid induced transcript 1                                                                                       | -5.09956 | 0.00065 |
| NM_025160    | WDR26           | WD repeat domain 26                                                                                                       | -4.99453 | 0.00074 |
| NM_017914    | C19orf24        | Chromosome 19 open reading frame 24                                                                                       | -5.7746  | 0.00027 |
| NM_019053    | EXOC6           | Exocyst complex component 6                                                                                               | -5.5546  | 0.00035 |
| NM_012249    | RHOQ            | Ras homolog gene family, member Q                                                                                         | 5.05453  | 0.00069 |
| NM_032823    | C9orf3          | Chromosome 9 open reading frame 3                                                                                         | 5.65131  | 0.00031 |
| NM_014388    | C1orf107        | Chromosome 1 open reading frame 107                                                                                       | -5.4832  | 0.00039 |
| BC054050     | THOC2           | THO complex 2                                                                                                             | -5.54513 | 0.00036 |
| NM_001017915 | INPP5D          | Inositol polyphosphate-5-phosphatase, 145kDa                                                                              | -5.83365 | 0.00025 |
| NM_032380    | GFM2            | G elongation factor, mitochondrial 2                                                                                      | -4.82169 | 0.00094 |
| NM_025054    | VCPIP1          | Valosin containing protein (p97)/p47 complex interacting protein 1                                                        | -5.25903 | 0.00052 |
| NM_006454    | MXD4            | MAX dimerization protein 4                                                                                                | 5.83018  | 0.00025 |
| THC2412623   | THC2412623      | Unknown                                                                                                                   | 5.5052   | 0.00038 |
| NM_131916    | PP1L3           | Peptidylprolyl isomerase (cyclophilin)-like 3                                                                             | -5.7303  | 0.00028 |
| NM_005730    | CTDSP2          | CTD (carboxy-terminal domain, RNA polymerase II, polypeptide A) small phosphatase 2                                       | -4.87806 | 0.00087 |
| NM_001000    | RPL39           | Ribosomal protein L39                                                                                                     | -5.27874 | 0.00051 |
| L06133       | ATP7A           | ATPase, Cu <sup>++</sup> transporting, alpha polypeptide (Menkes syndrome)                                                | -5.18321 | 0.00058 |
| NM_145059    | FUK             | Fucokinase                                                                                                                | -5.02457 | 0.00071 |
| BC043173     | BC043173        | CDNA clone IMAGE:5287121                                                                                                  | -4.87502 | 0.00088 |
| NM_015261    | NCAPD3          | Non-SMC condensin II complex, subunit D3                                                                                  | -5.01908 | 0.00072 |
| NM_175709    | CBX7            | Chromobox homolog 7                                                                                                       | -5.37048 | 0.00045 |
| NM_138764    | BAX             | BCL2-associated X protein                                                                                                 | 4.98972  | 0.00075 |
| NM_001002261 | ZFYVE27         | Zinc finger, FYVE domain containing 27                                                                                    | -5.04773 | 0.00069 |
| BX538256     | ENST00000369183 | MRNA; cDNA DKFZp686C1384 (from clone DKFZp686C1384)                                                                       | -5.41008 | 0.00043 |
| NM_139015    | SPPL3           | signal peptide peptidase 3                                                                                                | -5.26749 | 0.00052 |
| NM_176818    | 15E1.2          | hypothetical protein LOC283459                                                                                            | 4.87135  | 0.00088 |
| BX648207     | BX648207        | CDNA FLJ40891 fis, clone UTERU2001110                                                                                     | -5.16386 | 0.00059 |
| A_32_P19616  | A_32_P19616     | Unknown                                                                                                                   | 5.60695  | 0.00033 |
| NM_014829    | DDX46           | DEAD (Asp-Glu-Ala-Asp) box polypeptide 46                                                                                 | -5.52869 | 0.00037 |
| AK023831     | FLJ13769        | hypothetical protein FLJ13769                                                                                             | -5.65982 | 0.00031 |
| A_24_P298835 | A_24_P298835    | Unknown                                                                                                                   | -4.94729 | 0.00079 |
| NM_052862    | RCSD1           | RCSD domain containing 1                                                                                                  | -4.94157 | 0.0008  |
| XM_496145    | LOC440361       | PREDICTED: Homo sapiens similar to Ig heavy chain V-III region VH26 precursor (LOC440361), mRNA [XM_496145]               | 4.79274  | 0.00098 |
| NM_014649    | SAFB2           | Small nuclear ribonucleoprotein polypeptide E                                                                             | -4.92345 | 0.00082 |
| NM_152604    | ZNF383          | Zinc finger protein 383                                                                                                   | -4.95902 | 0.00078 |
| NM_022748    | TNS3            | Tensin 3                                                                                                                  | -5.23702 | 0.00054 |
| BC062636     | RHBDD1          | Rhomboid domain containing 1                                                                                              | -5.31878 | 0.00048 |
| NM_006591    | POLD3           | Polymerase (DNA-directed), delta 3, accessory subunit                                                                     | -5.68071 | 0.0003  |
| NM_024329    | EFHD2           | EF-hand domain family, member D2                                                                                          | 5.37781  | 0.00045 |
| NM_015485    | RWDD3           | RWD domain containing 3                                                                                                   | -5.33594 | 0.00047 |

|              |              |                                                                                                                           |          |         |
|--------------|--------------|---------------------------------------------------------------------------------------------------------------------------|----------|---------|
| AK094181     | TTC15        | Tetratricopeptide repeat domain 15                                                                                        | -5.28622 | 0.0005  |
| NM_017613    | DONSON       | Downstream neighbor of SON                                                                                                | -4.89151 | 0.00086 |
| BF476310     | PGPEP1       | Pyroglutamyl-peptidase I                                                                                                  | 5.57075  | 0.00035 |
| AK022016     | MYO1E        | Myosin IE                                                                                                                 | -5.28289 | 0.00051 |
| NM_018602    | DNAJA4       | DnaJ (Hsp40) homolog, subfamily A, member 4                                                                               | 5.08766  | 0.00066 |
| THC2405710   | THC2405710   | Unknown                                                                                                                   | -5.43828 | 0.00041 |
| NM_016227    | C1orf9       | Chromosome 1 open reading frame 9                                                                                         | -5.11283 | 0.00063 |
| NM_006568    | CGRRF1       | Cell growth regulator with ring finger domain 1                                                                           | -5.30073 | 0.00049 |
| XM_497928    | A_24_P409891 | Unknown                                                                                                                   | -5.10488 | 0.00064 |
| NM_032358    | CCDC77       | Coiled-coil domain containing 77                                                                                          | -4.97185 | 0.00077 |
| NM_020807    | ZNF319       | Zinc finger protein 319                                                                                                   | -4.89333 | 0.00086 |
| A_32_P145302 | A_32_P145302 | Unknown                                                                                                                   | 5.14089  | 0.00061 |
| NM_001007467 | SFI1         | Sfi1 homolog, spindle assembly associated (yeast)                                                                         | -5.24419 | 0.00053 |
| NM_021167    | GATAD1       | GATA zinc finger domain containing 1                                                                                      | 5.4081   | 0.00043 |
| A_24_P616082 | A_24_P616082 | Unknown                                                                                                                   | 5.48231  | 0.00039 |
| AK000103     | LOC153277    | hypothetical protein LOC153277                                                                                            | -5.60166 | 0.00033 |
| AK096109     | LOC339483    | hypothetical LOC339483                                                                                                    | -5.45198 | 0.0004  |
| NM_138621    | BCL2L11      | BCL2-like 11 (apoptosis facilitator)                                                                                      | 5.11569  | 0.00063 |
| NM_016563    | RASL12       | RAS-like, family 12                                                                                                       | 5.14387  | 0.00061 |
| NM_004551    | NDUFS3       | NADH dehydrogenase (ubiquinone) Fe-S protein 3, 30kDa (NADH-coenzyme Q reductase)                                         | 5.3438   | 0.00047 |
| NM_006618    | JARID1B      | Jumonji, AT rich interactive domain 1B                                                                                    | -5.52211 | 0.00037 |
| NM_015503    | SH2B1        | SH2B adaptor protein 1                                                                                                    | 5.12367  | 0.00062 |
| NM_020062    | SLC2A4RG     | SLC2A4 regulator                                                                                                          | 5.48553  | 0.00039 |
| NM_006321    | ARIH2        | Ariadne homolog 2 (Drosophila)                                                                                            | 4.82099  | 0.00095 |
| NM_020235    | BBX          | Bobby sox homolog (Drosophila)                                                                                            | -5.22583 | 0.00054 |
| NM_021167    | GATAD1       | GATA zinc finger domain containing 1                                                                                      | -4.7975  | 0.00098 |
| NM_000255    | MUT          | Methylmalonyl Coenzyme A mutase                                                                                           | -5.32572 | 0.00048 |
| NM_014636    | RALGPS1      | Ral GEF with PH domain and SH3 binding motif 1                                                                            | -5.3981  | 0.00043 |
| NM_003899    | ARHGEF7      | Rho guanine nucleotide exchange factor (GEF) 7                                                                            | -4.98475 | 0.00075 |
| BC032369     | HNRPUL2      | Heterogeneous nuclear ribonucleoprotein U-like 2                                                                          | 4.95545  | 0.00079 |
| NM_014739    | BCLAF1       | Homo sapiens BCL2-associated transcription factor 1 (BCLAF1), transcript variant 1, mRNA.                                 | -4.93999 | 0.0008  |
| NM_000364    | TNNT2        | Troponin T type 2 (cardiac)                                                                                               | 4.96733  | 0.00077 |
| NM_030639    | BHLHB9       | Basic helix-loop-helix domain containing, class B, 9                                                                      | -4.9057  | 0.00084 |
| NM_013430    | GGT1         | Gamma-glutamyltransferase 1                                                                                               | 4.78165  | 0.001   |
| NM_006594    | AP4B1        | Adaptor-related protein complex 4, beta 1 subunit                                                                         | -5.45928 | 0.0004  |
| NM_003188    | MAP3K7       | Mitogen-activated protein kinase kinase kinase 7                                                                          | -5.50014 | 0.00038 |
| THC2415754   | THC2415754   | Q9Y6H2 (Q9Y6H2) Ku70-binding protein (Fragment), partial (41%) [THC2415754]                                               | -4.97453 | 0.00077 |
| XM_496741    | LOC441066    | PREDICTED: Homo sapiens similar to Beta-glucuronidase precursor (LOC441066), mRNA [XM_496741]                             | 4.89513  | 0.00085 |
| NM_012430    | SEC22A       | SEC22 vesicle trafficking protein homolog A (S. cerevisiae)                                                               | -5.0367  | 0.0007  |
| NM_014805    | EPM2AIP1     | EPM2A (laforin) interacting protein 1                                                                                     | -5.02229 | 0.00072 |
| BC045718     | AMZ2         | archaemetzincins-2                                                                                                        | -4.86184 | 0.00089 |
| AK023737     | AK023737     | Homo sapiens cDNA FLJ13675 fis, clone PLACE1011875, highly similar to Homo sapiens mRNA for KIAA0580 protein.             | -5.39305 | 0.00044 |
| A_24_P110521 | A_24_P110521 | Unknown                                                                                                                   | -5.43875 | 0.00041 |
| NM_015355    | SUZ12        | Suppressor of zeste 12 homolog (Drosophila)                                                                               | -5.08232 | 0.00066 |
| THC2320257   | THC2320257   | Unknown                                                                                                                   | -5.26085 | 0.00052 |
| BM069797     | C18orf17     | Transcribed locus, strongly similar to XP_512065.1 similar to squamous cell carcinoma-related protein-1 [Pan troglodytes] | -5.06886 | 0.00067 |
| THC2373083   | THC2373083   | Unknown                                                                                                                   | -5.22908 | 0.00054 |
| NM_001439    | EXTL2        | Exostosins (multiple)-like 2                                                                                              | -5.22046 | 0.00055 |
| THC2340322   | THC2340322   | Q5T931 (Q5T931) Sorbin and SH3 domain containing 1, partial (3%) [THC2340322]                                             | -5.24933 | 0.00053 |
| NM_018297    | NGLY1        | N-glycanase 1                                                                                                             | -5.39139 | 0.00044 |
| A_32_P55438  | A_32_P55438  | Unknown                                                                                                                   | -5.09221 | 0.00065 |
| NM_019593    | KIAA1434     | hypothetical protein KIAA1434                                                                                             | -4.86596 | 0.00089 |
| NM_005813    | PRKD3        | Protein kinase D3                                                                                                         | -5.19393 | 0.00057 |
| NM_001750    | CAST         | Calpastatin                                                                                                               | -5.38217 | 0.00044 |
| THC2266506   | THC2266506   | RS24_HUMAN (P62847) 40S ribosomal protein S24, complete [THC2266506]                                                      | -5.34445 | 0.00047 |
| NM_001029    | RPS26        | Ribosomal protein S26                                                                                                     | -5.39967 | 0.00043 |
| NM_147171    | AKAP9        | A kinase (PRKA) anchor protein (yotiao) 9                                                                                 | -5.10376 | 0.00064 |
| THC2671898   | THC2671898   | Q3WYF8_9ACTN (Q3WYF8) Sulfotransferase, partial (6%) [THC2671898]                                                         | 4.9822   | 0.00076 |
| NM_005773    | ZNF256       | Zinc finger protein 418                                                                                                   | -5.08148 | 0.00066 |

|              |              |                                                                                                      |          |         |
|--------------|--------------|------------------------------------------------------------------------------------------------------|----------|---------|
| A_32_P8971   | A_32_P8971   | Unknown                                                                                              | -4.99489 | 0.00074 |
| NM_173854    | SLC41A1      | Solute carrier family 41, member 1                                                                   | -5.30434 | 0.00049 |
| NM_016467    | ORMDL1       | ORM1-like 1 ( <i>S. cerevisiae</i> )                                                                 | -5.13111 | 0.00062 |
| THC2437881   | THC2437881   | Q9NBA9 (Q9NBA9) Stretchin-MLCK (Fragment), partial (5%) [THC2437881]                                 | -5.17389 | 0.00058 |
| NM_004487    | GOLGB1       | Golgi autoantigen, golgin subfamily b, macrogolgin (with transmembrane signal), 1                    | -5.26839 | 0.00051 |
| NM_013444    | UBQLN2       | Ubiquilin 2                                                                                          | -4.98166 | 0.00076 |
| NM_001011667 | CHCHD7       | Coiled-coil-helix-coiled-coil-helix domain containing 7                                              | -5.02654 | 0.00071 |
| NM_020666    | CLK4         | CDC-like kinase 4                                                                                    | -5.18565 | 0.00057 |
| NM_006221    | PIN1         | Protein (peptidylprolyl cis/trans isomerase) NIMA-interacting 1                                      | 5.0031   | 0.00074 |
| NM_001029    | RPS26        | Ribosomal protein S26                                                                                | -5.3064  | 0.00049 |
| THC2280343   | THC2280343   | ALU6_HUMAN (P39193) Alu subfamily SP sequence contamination warning entry, partial (9%) [THC2280343] | -4.93191 | 0.00081 |
| AK023675     | UTRN         | Utrophin (homologous to dystrophin)                                                                  | -5.03783 | 0.0007  |
| NM_024065    | PDCL3        | Phosducin-like 3                                                                                     | -4.79228 | 0.00098 |
| NM_182663    | RASSF5       | Ras association (RalGDS/AF-6) domain family 5                                                        | 4.79344  | 0.00098 |
| NM_018456    | EAF2         | ELL associated factor 2                                                                              | -5.1398  | 0.00061 |
| A_23_P158868 | A_23_P158868 | Unknown                                                                                              | 5.19558  | 0.00057 |
| XM_940047    | LOC654152    | PREDICTED: Homo sapiens similar to ribosomal protein L21 isoform 1 (LOC654152), mRNA [XM_940047]     | -5.06821 | 0.00067 |
| NM_003264    | TLR2         | Toll-like receptor 2                                                                                 | -5.20009 | 0.00056 |
| NM_015117    | ZC3H3        | Zinc finger CCCH-type containing 3                                                                   | 5.05631  | 0.00068 |
| NM_024112    | C9orf16      | Chromosome 9 open reading frame 16                                                                   | 5.0859   | 0.00066 |
| NM_006051    | APBB3        | Amyloid beta (A4) precursor protein-binding, family B, member 3                                      | -4.83419 | 0.00093 |
| NM_032714    | C14orf151    | Chromosome 14 open reading frame 151                                                                 | 5.05654  | 0.00068 |
| NM_015911    | ZNF691       | Zinc finger protein 691                                                                              | -4.89911 | 0.00085 |
| THC2306096   | THC2306096   | Unknown                                                                                              | -5.15365 | 0.0006  |
| NM_015088    | TNRC6B       | Trinucleotide repeat containing 6B                                                                   | -4.78159 | 0.001   |
| A_32_P158543 | A_32_P158543 | Unknown                                                                                              | 4.83166  | 0.00093 |
| NM_004278    | PIGL         | Phosphatidylinositol glycan anchor biosynthesis, class L                                             | 5.03195  | 0.00071 |
| NM_024313    | NOL12        | Nucleolar protein 12                                                                                 | 4.80569  | 0.00097 |
| NM_014238    | KSR1         | Kinase suppressor of ras 1                                                                           | 4.99409  | 0.00074 |
| NM_015412    | C3orf17      | Chromosome 3 open reading frame 17                                                                   | -5.07804 | 0.00066 |
| NM_018255    | STATIP1      | Signal transducer and activator of transcription 3 interacting protein 1                             | -4.88966 | 0.00086 |
| A_32_P180185 | A_32_P180185 | Unknown                                                                                              | -4.90553 | 0.00084 |
| L31408       | FGF2         | Fibroblast growth factor 2 (basic)                                                                   | 4.99531  | 0.00074 |
| NM_014608    | CYFIP1       | Cytoplasmic FMR1 interacting protein 1                                                               | -4.97789 | 0.00076 |
| NM_000655    | SELL         | Selectin L (lymphocyte adhesion molecule 1)                                                          | -4.93527 | 0.00081 |
| NM_153240    | NPHP3        | Nephronophthisis 3 (adolescent)                                                                      | -4.85518 | 0.0009  |
| NM_031444    | C22orf13     | Chromosome 22 open reading frame 13                                                                  | 4.95359  | 0.00079 |
| NM_003811    | TNFSF9       | Tumor necrosis factor (ligand) superfamily, member 9                                                 | 4.87787  | 0.00087 |
| NM_016310    | POLR3K       | Polymerase (RNA) III (DNA directed) polypeptide K, 12.3 kDa                                          | 4.78534  | 0.00099 |
| NM_021149    | COTL1        | Coactosin-like 1 ( <i>Dictyostelium</i> )                                                            | 4.83716  | 0.00092 |
| THC2409283   | THC2409283   | Unknown                                                                                              | -4.98158 | 0.00076 |
| X81724       | CPVL         | Carboxypeptidase, vitellogenic-like                                                                  | 4.78924  | 0.00099 |
| NM_001039360 | ZBTB7C       | Zinc finger and BTB domain containing 7C                                                             | 4.94196  | 0.0008  |
| NM_003387    | WIPF1        | WAS/WASL interacting protein family, member 1                                                        | -4.91746 | 0.00083 |
| BE774743     | THC2363476   | CDNA FLJ13267 fis, clone OVARC1000964                                                                | 4.92569  | 0.00082 |
| NM_032330    | CAPNS2       | Calpain, small subunit 2                                                                             | 4.85241  | 0.00091 |
| NM_015540    | RPAP1        | RNA polymerase II associated protein 1                                                               | -4.89166 | 0.00086 |
| XM_376787    | RPS26P10     | Ribosomal protein S26 pseudogene 10                                                                  | -4.90436 | 0.00084 |
| NM_018125    | ARHGEF10L    | Rho guanine nucleotide exchange factor (GEF) 10-like                                                 | 4.88064  | 0.00087 |
| NM_017644    | KLHL24       | Kelch-like 24 ( <i>Drosophila</i> )                                                                  | -4.8297  | 0.00093 |
| NM_015132    | SNX13        | Sorting nexin 13                                                                                     | -4.82155 | 0.00094 |
| NM_153219    | ZNF524       | Zinc finger protein 524                                                                              | -4.82122 | 0.00095 |
| A_23_P206568 | A_23_P206568 | Unknown                                                                                              | 4.81298  | 0.00096 |

| Pathway                                                    | Gene    | Description                                                                                                                           |
|------------------------------------------------------------|---------|---------------------------------------------------------------------------------------------------------------------------------------|
| Cell adhesion molecules (CAMs)                             | HLA-DMB | Major histocompatibility complex, class II, DM beta                                                                                   |
|                                                            | ITGB7   | Integrin, beta 7                                                                                                                      |
|                                                            | ITGB1   | Integrin, beta 1 (fibronectin receptor, beta polypeptide, antigen CD29 includes MDF2, MSK12)                                          |
|                                                            | HLA-DMA | Major histocompatibility complex, class II, DM beta                                                                                   |
|                                                            | SDC4    | Syndecan 4 (amphiglycan, ryudocan)                                                                                                    |
|                                                            | HLA-DOB | Homo sapiens major histocompatibility complex, class II, DO beta (HLA-DOB), mRNA.                                                     |
|                                                            | SELP    | Selectin P (granule membrane protein 140kDa, antigen CD62)                                                                            |
|                                                            | NLGN1   | Neuroigin 1                                                                                                                           |
|                                                            | SELL    | Selectin L (lymphocyte adhesion molecule 1)                                                                                           |
|                                                            | L1CAM   | L1 cell adhesion molecule                                                                                                             |
|                                                            | ICAM2   | Intercellular adhesion molecule 2                                                                                                     |
| ECM-receptor interaction                                   | ITGB7   | Integrin, beta 7                                                                                                                      |
|                                                            | ITGB1   | Integrin, beta 1 (fibronectin receptor, beta polypeptide, antigen CD29 includes MDF2, MSK12)                                          |
|                                                            | SDC4    | Syndecan 4 (amphiglycan, ryudocan)                                                                                                    |
| Antigen processing and presentation                        | HLA-DMB | Major histocompatibility complex, class II, DM beta                                                                                   |
|                                                            | HLA-DMA | Major histocompatibility complex, class II, DM beta                                                                                   |
|                                                            | HLA-DOB | Homo sapiens major histocompatibility complex, class II, DO beta (HLA-DOB), mRNA.                                                     |
| Type I diabetes mellitus                                   | HLA-DMB | Major histocompatibility complex, class II, DM beta                                                                                   |
|                                                            | HLA-DMA | Major histocompatibility complex, class II, DM beta                                                                                   |
|                                                            | TNF     | Tumor necrosis factor (TNF superfamily, member 2)                                                                                     |
|                                                            | HLA-DOB | Homo sapiens major histocompatibility complex, class II, DO beta (HLA-DOB), mRNA.                                                     |
| Bile acid biosynthesis                                     | ACAD8   | Acyl-Coenzyme A dehydrogenase family, member 8                                                                                        |
|                                                            | LIPA    | Lipase A, lysosomal acid, cholesterol esterase (Wolman disease)                                                                       |
|                                                            | ACAA1   | Acetyl-Coenzyme A acyltransferase 1 (peroxisomal 3-oxoacyl-Coenzyme A thiolase)                                                       |
| Aminoacyl-tRNA biosynthesis                                | QARS    | Glutaminyl-tRNA synthetase                                                                                                            |
|                                                            | HARSL   | Histidyl-tRNA synthetase-like                                                                                                         |
|                                                            | HARS    | Histidyl-tRNA synthetase                                                                                                              |
| Histidine metabolism                                       | PRMT2   | Protein arginine methyltransferase 2                                                                                                  |
|                                                            | HARS    | Histidyl-tRNA synthetase                                                                                                              |
|                                                            | HARSL   | Histidyl-tRNA synthetase-like                                                                                                         |
| Epithelial cell signaling in Helicobacter pylori infection | PLCG2   | Phospholipase C, gamma 2 (phosphatidylinositol-specific)                                                                              |
|                                                            | IKBKB   | Golgi autoantigen, golgin subfamily a, 7                                                                                              |
|                                                            | HBEGF   | Heparin-binding EGF-like growth factor                                                                                                |
|                                                            | RAC1    | Ras-related C3 botulinum toxin substrate 1 (rho family, small GTP binding protein Rac1)                                               |
|                                                            | MAPK14  | Mitogen-activated protein kinase 14                                                                                                   |
| Glycosylphosphatidylinositol(GPI)-anchor biosynthesis      | PIGA    | Phosphatidylinositol glycan anchor biosynthesis, class A (paroxysmal nocturnal hemoglobinuria)                                        |
|                                                            | PIGK    | Phosphatidylinositol glycan anchor biosynthesis, class K                                                                              |
|                                                            | PIGG    | Phosphatidylinositol glycan anchor biosynthesis, class G                                                                              |
|                                                            | PIGL    | Phosphatidylinositol glycan anchor biosynthesis, class L                                                                              |
| Alkaloid biosynthesis II                                   | MYST3   | MYST histone acetyltransferase (monocytic leukemia) 3                                                                                 |
|                                                            | MYST4   | MYST histone acetyltransferase (monocytic leukemia) 4                                                                                 |
|                                                            | LIPA    | Lipase A, lysosomal acid, cholesterol esterase (Wolman disease)                                                                       |
| 1- and 2-Methylnaphthalene degradation                     | MYST3   | MYST histone acetyltransferase (monocytic leukemia) 3                                                                                 |
|                                                            | MYST4   | MYST histone acetyltransferase (monocytic leukemia) 4                                                                                 |
|                                                            | ACAD8   | Acyl-Coenzyme A dehydrogenase family, member 8                                                                                        |
| Benzoate degradation via CoA ligation                      | MYST3   | MYST histone acetyltransferase (monocytic leukemia) 3                                                                                 |
|                                                            | ACAT1   | Acetyl-Coenzyme A acetyltransferase 1 (acetoacetyl Coenzyme A thiolase)                                                               |
|                                                            | MYST4   | MYST histone acetyltransferase (monocytic leukemia) 4                                                                                 |
|                                                            | HADHA   | Hydroxyacyl-Coenzyme A dehydrogenase/3-ketoacyl-Coenzyme A thiolase/enoyl-Coenzyme A hydratase (trifunctional protein), alpha subunit |
| Limonene and pinene degradation                            | MYST3   | MYST histone acetyltransferase (monocytic leukemia) 3                                                                                 |

|                                       |                            |                                                                                                                                       |
|---------------------------------------|----------------------------|---------------------------------------------------------------------------------------------------------------------------------------|
|                                       | HADHA                      | Hydroxyacyl-Coenzyme A dehydrogenase/3-ketoacyl-Coenzyme A thiolase/enoyl-Coenzyme A hydratase (trifunctional protein), alpha subunit |
| Glycerophospholipid metabolism        | MYST4                      | MYST histone acetyltransferase (monocytic leukemia) 4                                                                                 |
|                                       | MYST3                      | MYST histone acetyltransferase (monocytic leukemia) 3                                                                                 |
|                                       | GPAM                       | Glycerol-3-phosphate acyltransferase, mitochondrial                                                                                   |
|                                       | MYST4                      | MYST histone acetyltransferase (monocytic leukemia) 4                                                                                 |
|                                       | LYPLA2                     | Lysophospholipase II                                                                                                                  |
|                                       | PPAP2C                     | Phosphatidic acid phosphatase type 2C                                                                                                 |
| Adherens junction                     | ACTC1                      | Actin, alpha, cardiac muscle 1                                                                                                        |
|                                       | CSNK2A2                    | Casein kinase 2, alpha prime polypeptide                                                                                              |
|                                       | ACTN3                      | Actinin, alpha 3                                                                                                                      |
|                                       | EP300                      | E1A binding protein p300                                                                                                              |
|                                       | WASF2                      | CDNA clone IMAGE:3030163                                                                                                              |
|                                       | MAP3K7                     | Mitogen-activated protein kinase kinase kinase 7                                                                                      |
|                                       | IQGAP1                     | IQ motif containing GTPase activating protein 1                                                                                       |
|                                       | RAC3                       | Ras-related C3 botulinum toxin substrate 3 (rho family, small GTP binding protein Rac3)                                               |
|                                       | RAC1                       | Ras-related C3 botulinum toxin substrate 1 (rho family, small GTP binding protein Rac1)                                               |
|                                       | SNAI2                      | Snail homolog 2 (Drosophila)                                                                                                          |
|                                       | FGFR1                      | Fibroblast growth factor receptor 1 (fms-related tyrosine kinase 2, Pfeiffer syndrome)                                                |
|                                       | SMAD3                      | SMAD family member 3                                                                                                                  |
|                                       | LMO7                       | LIM domain 7                                                                                                                          |
|                                       | TGFBR2                     | Transforming growth factor, beta receptor II (70/80kDa)                                                                               |
|                                       | TGF-beta signaling pathway | ROCK2                                                                                                                                 |
| RPS6KB1                               |                            | Ribosomal protein S6 kinase, 70kDa, polypeptide 1                                                                                     |
| EP300                                 |                            | E1A binding protein p300                                                                                                              |
| BMPR1A                                |                            | Bone morphogenetic protein receptor, type IA                                                                                          |
| RPS6KB2                               |                            | Ribosomal protein S6 kinase, 70kDa, polypeptide 2                                                                                     |
| TNF                                   |                            | Tumor necrosis factor (TNF superfamily, member 2)                                                                                     |
| SMAD3                                 |                            | SMAD family member 3                                                                                                                  |
| TGFBR2                                |                            | Transforming growth factor, beta receptor II (70/80kDa)                                                                               |
| Ubiquitin mediated proteolysis        | ITCH                       | Itchy homolog E3 ubiquitin protein ligase (mouse)                                                                                     |
|                                       | ANAPC7                     | Anaphase promoting complex subunit 7                                                                                                  |
|                                       | EDD1                       | E3 ubiquitin protein ligase, HECT domain containing, 1                                                                                |
|                                       | UBE2D2                     | Ubiquitin-conjugating enzyme E2D 2 (UBC4/5 homolog, yeast)                                                                            |
|                                       | FZR1                       | Fizzy/cell division cycle 20 related 1 (Drosophila)                                                                                   |
| Tyrosine metabolism                   | MYST3                      | MYST histone acetyltransferase (monocytic leukemia) 3                                                                                 |
|                                       | PRMT2                      | Protein arginine methyltransferase 2                                                                                                  |
|                                       | MYST4                      | MYST histone acetyltransferase (monocytic leukemia) 4                                                                                 |
| Inositol phosphate metabolism         | PIK3C3                     | Phosphoinositide-3-kinase, class 3                                                                                                    |
|                                       | MINPP1                     | Multiple inositol polyphosphate histidine phosphatase, 1                                                                              |
|                                       | PLCG2                      | Phospholipase C, gamma 2 (phosphatidylinositol-specific)                                                                              |
|                                       | PIP5K2B                    | Phosphatidylinositol-4-phosphate 5-kinase, type II, beta                                                                              |
|                                       | PIK3CD                     | Phosphoinositide-3-kinase, catalytic, delta polypeptide                                                                               |
| Phosphatidylinositol signaling system | PLCG2                      | Phospholipase C, gamma 2 (phosphatidylinositol-specific)                                                                              |
|                                       | CALM1                      | Calmodulin 1 (phosphorylase kinase, delta)                                                                                            |
|                                       | PIK3C3                     | Phosphoinositide-3-kinase, class 3                                                                                                    |
|                                       | INPP5D                     | Inositol polyphosphate-5-phosphatase, 145kDa                                                                                          |
|                                       | PRKCA                      | Protein kinase C, alpha                                                                                                               |
|                                       | PIP5K2B                    | Phosphatidylinositol-4-phosphate 5-kinase, type II, beta                                                                              |
|                                       | PIK3CD                     | Phosphoinositide-3-kinase, catalytic, delta polypeptide                                                                               |
| Oxidative phosphorylation             | NDUFS3                     | NADH dehydrogenase (ubiquinone) Fe-S protein 3, 30kDa (NADH-coenzyme Q reductase)                                                     |
|                                       | NDUFC1                     | NADH dehydrogenase (ubiquinone) 1, subcomplex unknown, 1, 6kDa                                                                        |
|                                       | COX11                      | COX11 homolog, cytochrome c oxidase assembly protein (yeast)                                                                          |

|                                              |          |                                                                                                |
|----------------------------------------------|----------|------------------------------------------------------------------------------------------------|
|                                              | NDUFS5   | NADH dehydrogenase (ubiquinone) Fe-S protein 5, 15kDa (NADH-coenzyme Q reductase)              |
|                                              | COX8A    | Cytochrome c oxidase subunit 8A (ubiquitous)                                                   |
| Ribosome                                     | RPL39    | Ribosomal protein L39                                                                          |
|                                              | RPL21    | Ribosomal protein L21                                                                          |
|                                              | RPL22    | Ribosomal protein L22                                                                          |
|                                              | RPS26P10 | Ribosomal protein S26 pseudogene 10                                                            |
|                                              | RPS26    | Ribosomal protein S26                                                                          |
|                                              | RPL15    | Ribosomal protein L15                                                                          |
|                                              | RPS23    | Ribosomal protein S23                                                                          |
| Arachidonic acid metabolism                  | GGT1     | Gamma-glutamyltransferase 1                                                                    |
|                                              | LTC4S    | Leukotriene C4 synthase                                                                        |
|                                              | ALOX5    | Arachidonate 5-lipoxygenase                                                                    |
| Glutathione metabolism                       | GSTM2    | Glutathione S-transferase M2 (muscle)                                                          |
|                                              | GSTM1    | Glutathione S-transferase M1                                                                   |
|                                              | GSTM4    | Glutathione S-transferase M4                                                                   |
|                                              | G6PD     | Glucose-6-phosphate dehydrogenase                                                              |
|                                              | GGT1     | Gamma-glutamyltransferase 1                                                                    |
| Metabolism of xenobiotics by cytochrome P450 | GSTM4    | Glutathione S-transferase M4                                                                   |
|                                              | GSTM2    | Glutathione S-transferase M2 (muscle)                                                          |
|                                              | GSTM1    | Glutathione S-transferase M1                                                                   |
|                                              | UGT2B7   | UDP glucuronosyltransferase 2 family, polypeptide B7                                           |
| Cholera - Infection                          | PLCG2    | Phospholipase C, gamma 2 (phosphatidylinositol-specific)                                       |
|                                              | PRKCA    | Protein kinase C, alpha                                                                        |
|                                              | SEC61A2  | Sec61 alpha 2 subunit ( <i>S. cerevisiae</i> )                                                 |
|                                              | ARF3     | ADP-ribosylation factor 3                                                                      |
| Chondroitin sulfate biosynthesis             | CSGlcA-T | chondroitin sulfate glucuronyltransferase                                                      |
|                                              | XYLT1    | Xylosyltransferase I                                                                           |
|                                              | ChGn     | chondroitin beta1,4 N-acetylgalactosaminyltransferase                                          |
| Cytokine-cytokine receptor interaction       | TNF      | Tumor necrosis factor (TNF superfamily, member 2)                                              |
|                                              | GH2      | Chorionic somatomammotropin hormone 1 (placental lactogen)                                     |
|                                              | IL1RAP   | Interleukin 1 receptor accessory protein                                                       |
|                                              | BMPR1A   | Bone morphogenetic protein receptor, type IA                                                   |
|                                              | TNFRSF17 | Tumor necrosis factor receptor superfamily, member 17                                          |
|                                              | IL10RA   | Interleukin 10 receptor, alpha                                                                 |
|                                              | HGF      | Human mRNA for hepatocyte growth factor (HGF).                                                 |
|                                              | TNFSF9   | Tumor necrosis factor (ligand) superfamily, member 9                                           |
|                                              | IL17RA   | Interleukin 17 receptor A                                                                      |
|                                              | CXCL12   | Chemokine (C-X-C motif) ligand 12 (stromal cell-derived factor 1)                              |
|                                              | TGFBR2   | Transforming growth factor, beta receptor II (70/80kDa)                                        |
| Glycan structures - biosynthesis 2           | B4GALT2  | UDP-Gal:betaGlcNAc beta 1,4- galactosyltransferase, polypeptide 2                              |
|                                              | STT3B    | STT3, subunit of the oligosaccharyltransferase complex, homolog B ( <i>S. cerevisiae</i> )     |
|                                              | PIGA     | Phosphatidylinositol glycan anchor biosynthesis, class A (paroxysmal nocturnal hemoglobinuria) |
|                                              | PIGK     | Phosphatidylinositol glycan anchor biosynthesis, class K                                       |
|                                              | PIGG     | Phosphatidylinositol glycan anchor biosynthesis, class G                                       |
|                                              | ST3GAL4  | ST3 beta-galactoside alpha-2,3-sialyltransferase 4                                             |
|                                              | PIGL     | Phosphatidylinositol glycan anchor biosynthesis, class L                                       |
| Fructose and mannose metabolism              | PFKL     | Phosphofructokinase, liver                                                                     |
|                                              | GMPPA    | GDP-mannose pyrophosphorylase A                                                                |
|                                              | STT3B    | STT3, subunit of the oligosaccharyltransferase complex, homolog B ( <i>S. cerevisiae</i> )     |
|                                              | SORD     | Sorbitol dehydrogenase                                                                         |
|                                              | FUK      | Fucokinase                                                                                     |
|                                              | HK2      | Hexokinase 2                                                                                   |

|                                     |                                            |                                                                                                                                       |                                                                         |  |
|-------------------------------------|--------------------------------------------|---------------------------------------------------------------------------------------------------------------------------------------|-------------------------------------------------------------------------|--|
| Galactose metabolism                | PFKL                                       | Phosphofructokinase, liver                                                                                                            |                                                                         |  |
|                                     | B4GALT2                                    | UDP-Gal:betaGlcNAc beta 1,4- galactosyltransferase, polypeptide 2                                                                     |                                                                         |  |
|                                     | HK2                                        | Hexokinase 2                                                                                                                          |                                                                         |  |
| Fatty acid metabolism               | ACAT1                                      | Acetyl-Coenzyme A acetyltransferase 1 (acetoacetyl Coenzyme A thiolase)                                                               |                                                                         |  |
|                                     | ACOX1                                      | Acyl-Coenzyme A oxidase 1, palmitoyl                                                                                                  |                                                                         |  |
|                                     | ACAA1                                      | Acetyl-Coenzyme A acyltransferase 1 (peroxisomal 3-oxoacyl-Coenzyme A thiolase)                                                       |                                                                         |  |
|                                     | HADHA                                      | Hydroxyacyl-Coenzyme A dehydrogenase/3-ketoacyl-Coenzyme A thiolase/enoyl-Coenzyme A hydratase (trifunctional protein), alpha subunit |                                                                         |  |
|                                     | CYP4F8                                     | Cytochrome P450, family 4, subfamily F, polypeptide 8                                                                                 |                                                                         |  |
| Glycan structures - biosynthesis 1  | B4GALT2                                    | UDP-Gal:betaGlcNAc beta 1,4- galactosyltransferase, polypeptide 2                                                                     |                                                                         |  |
|                                     | ALG6                                       | Asparagine-linked glycosylation 6 homolog (S. cerevisiae, alpha-1,3-glucosyltransferase)                                              |                                                                         |  |
|                                     | ST3GAL4                                    | ST3 beta-galactoside alpha-2,3-sialyltransferase 4                                                                                    |                                                                         |  |
|                                     | XYLT1                                      | Xylosyltransferase I                                                                                                                  |                                                                         |  |
|                                     | EXT2                                       | Exostoses (multiple) 2                                                                                                                |                                                                         |  |
|                                     | B3GNT6                                     | UDP-GlcNAc:betaGal beta-1,3-N-acetylglucosaminyltransferase 6 (core 3 synthase)                                                       |                                                                         |  |
|                                     | RPN1                                       | Ribophorin I                                                                                                                          |                                                                         |  |
|                                     | CSGlcA-T                                   | chondroitin sulfate glucuronyltransferase                                                                                             |                                                                         |  |
|                                     | ChGn                                       | chondroitin beta 1,4 N-acetylgalactosaminyltransferase                                                                                |                                                                         |  |
|                                     | EXTL2                                      | Exostoses (multiple)-like 2                                                                                                           |                                                                         |  |
|                                     | MAN1B1                                     | Mannosidase, alpha, class 1B, member 1                                                                                                |                                                                         |  |
|                                     | MAN1A2                                     | Mannosidase, alpha, class 1A, member 2                                                                                                |                                                                         |  |
|                                     | Huntington's disease                       | DCTN1                                                                                                                                 | Dynactin 1 (p150, glued homolog, Drosophila)                            |  |
|                                     |                                            | BAX                                                                                                                                   | BCL2-associated X protein                                               |  |
| CALM1                               |                                            | Calmodulin 1 (phosphorylase kinase, delta)                                                                                            |                                                                         |  |
| EP300                               |                                            | E1A binding protein p300                                                                                                              |                                                                         |  |
| Cell cycle                          |                                            | BUB3                                                                                                                                  | BUB3 budding uninhibited by benzimidazoles 3 homolog (yeast)            |  |
|                                     | ANAPC7                                     | Anaphase promoting complex subunit 7                                                                                                  |                                                                         |  |
|                                     | EP300                                      | E1A binding protein p300                                                                                                              |                                                                         |  |
|                                     | YWHAE                                      | Tyrosine 3-monooxygenase/tryptophan 5-monooxygenase activation protein, epsilon polypeptide                                           |                                                                         |  |
|                                     | ATR                                        | Ataxia telangiectasia and Rad3 related                                                                                                |                                                                         |  |
|                                     | SMAD3                                      | SMAD family member 3                                                                                                                  |                                                                         |  |
|                                     | FZR1                                       | Fizzy/cell division cycle 20 related 1 (Drosophila)                                                                                   |                                                                         |  |
|                                     | Valine, leucine and isoleucine degradation | ACAT1                                                                                                                                 | Acetyl-Coenzyme A acetyltransferase 1 (acetoacetyl Coenzyme A thiolase) |  |
| MYST3                               |                                            | MYST histone acetyltransferase (monocytic leukemia) 3                                                                                 |                                                                         |  |
| ACAA1                               |                                            | Acetyl-Coenzyme A acyltransferase 1 (peroxisomal 3-oxoacyl-Coenzyme A thiolase)                                                       |                                                                         |  |
| BCAT2                               |                                            | Branched chain aminotransferase 2, mitochondrial                                                                                      |                                                                         |  |
| MYST4                               |                                            | MYST histone acetyltransferase (monocytic leukemia) 4                                                                                 |                                                                         |  |
| HADHA                               |                                            | Hydroxyacyl-Coenzyme A dehydrogenase/3-ketoacyl-Coenzyme A thiolase/enoyl-Coenzyme A hydratase (trifunctional protein), alpha subunit |                                                                         |  |
| MUT                                 |                                            | Methylmalonyl Coenzyme A mutase                                                                                                       |                                                                         |  |
| Amyotrophic lateral sclerosis (ALS) | RAB5A                                      | RAB5A, member RAS oncogene family                                                                                                     |                                                                         |  |
|                                     | BAX                                        | BCL2-associated X protein                                                                                                             |                                                                         |  |
|                                     | PPP3CA                                     | Protein phosphatase 3 (formerly 2B), catalytic subunit, alpha isoform (calcineurin A alpha)                                           |                                                                         |  |
|                                     | RAC1                                       | Ras-related C3 botulinum toxin substrate 1 (rho family, small GTP binding protein Rac1)                                               |                                                                         |  |
|                                     | CAT                                        | Catalase                                                                                                                              |                                                                         |  |
|                                     | SLC1A2                                     | Homo sapiens solute carrier family 1 (glial high affinity glutamate transporter), member 2 (SLC1A2), mRNA.                            |                                                                         |  |
| Glycerolipid metabolism             | GPAM                                       | Glycerol-3-phosphate acyltransferase, mitochondrial                                                                                   |                                                                         |  |
|                                     | STT3B                                      | STT3, subunit of the oligosaccharyltransferase complex, homolog B (S. cerevisiae)                                                     |                                                                         |  |
|                                     | PPAP2C                                     | Phosphatidic acid phosphatase type 2C                                                                                                 |                                                                         |  |
|                                     | LIPA                                       | Lipase A, lysosomal acid, cholesterol esterase (Wolman disease)                                                                       |                                                                         |  |
| DNA polymerase                      | POLD4                                      | Polymerase (DNA-directed), delta 4                                                                                                    |                                                                         |  |
|                                     | POLE4                                      | Polymerase (DNA-directed), epsilon 4 (p12 subunit)                                                                                    |                                                                         |  |
|                                     | POLD3                                      | Polymerase (DNA-directed), delta 3, accessory subunit                                                                                 |                                                                         |  |
|                                     | POLE3                                      | Polymerase (DNA directed), epsilon 3 (p17 subunit)                                                                                    |                                                                         |  |



|                                 |                            |                                                                                                                            |                                                            |
|---------------------------------|----------------------------|----------------------------------------------------------------------------------------------------------------------------|------------------------------------------------------------|
| Purine metabolism               | POLE                       | Polymerase (DNA directed), epsilon                                                                                         |                                                            |
|                                 | ADSS                       | Adenylosuccinate synthase                                                                                                  |                                                            |
|                                 | PDE4C                      | Phosphodiesterase 4C, cAMP-specific (phosphodiesterase E1 dunce homolog, Drosophila)                                       |                                                            |
|                                 | XDH                        | Xanthine dehydrogenase                                                                                                     |                                                            |
|                                 | POLR3H                     | Polymerase (RNA) III (DNA directed) polypeptide H (22.9kD)                                                                 |                                                            |
|                                 | POLR3K                     | Polymerase (RNA) III (DNA directed) polypeptide K, 12.3 kDa                                                                |                                                            |
|                                 | POLD4                      | Polymerase (DNA-directed), delta 4                                                                                         |                                                            |
|                                 | POLE4                      | Polymerase (DNA-directed), epsilon 4 (p12 subunit)                                                                         |                                                            |
|                                 | DCK                        | Deoxycytidine kinase                                                                                                       |                                                            |
|                                 | POLE3                      | Polymerase (DNA directed), epsilon 3 (p17 subunit)                                                                         |                                                            |
|                                 | POLD3                      | Polymerase (DNA-directed), delta 3, accessory subunit                                                                      |                                                            |
|                                 | GART                       | Phosphoribosylglycinamide formyltransferase, phosphoribosylglycinamide synthetase, phosphoribosylaminoimidazole synthetase |                                                            |
|                                 | POLE                       | Polymerase (DNA directed), epsilon                                                                                         |                                                            |
| Pyrimidine metabolism           | POLR3H                     | Polymerase (RNA) III (DNA directed) polypeptide H (22.9kD)                                                                 |                                                            |
|                                 | POLD4                      | Polymerase (DNA-directed), delta 4                                                                                         |                                                            |
|                                 | POLR3K                     | Polymerase (RNA) III (DNA directed) polypeptide K, 12.3 kDa                                                                |                                                            |
|                                 | DCK                        | Deoxycytidine kinase                                                                                                       |                                                            |
|                                 | POLE4                      | Polymerase (DNA-directed), epsilon 4 (p12 subunit)                                                                         |                                                            |
|                                 | POLE3                      | Polymerase (DNA directed), epsilon 3 (p17 subunit)                                                                         |                                                            |
|                                 | DHODH                      | Dihydroorotate dehydrogenase                                                                                               |                                                            |
|                                 | POLD3                      | Polymerase (DNA-directed), delta 3, accessory subunit                                                                      |                                                            |
|                                 | TK2                        | Thymidine kinase 2, mitochondrial                                                                                          |                                                            |
|                                 | POLE                       | Polymerase (DNA directed), epsilon                                                                                         |                                                            |
|                                 | Jak-STAT signaling pathway | GH2                                                                                                                        | Chorionic somatomammotropin hormone 1 (placental lactogen) |
| AKT1                            |                            | V-akt murine thymoma viral oncogene homolog 1                                                                              |                                                            |
| STAT6                           |                            | Signal transducer and activator of transcription 6, interleukin-4 induced                                                  |                                                            |
| CISH                            |                            | Cytokine inducible SH2-containing protein                                                                                  |                                                            |
| EP300                           |                            | E1A binding protein p300                                                                                                   |                                                            |
| PIAS4                           |                            | Protein inhibitor of activated STAT, 4                                                                                     |                                                            |
| PIAS3                           |                            | Protein inhibitor of activated STAT, 3                                                                                     |                                                            |
| IL10RA                          |                            | Interleukin 10 receptor, alpha                                                                                             |                                                            |
| PIK3CD                          |                            | Phosphoinositide-3-kinase, catalytic, delta polypeptide                                                                    |                                                            |
| CBLB                            |                            | Cas-Br-M (murine) ecotropic retroviral transforming sequence b                                                             |                                                            |
| STAT5B                          |                            | Signal transducer and activator of transcription 5B                                                                        |                                                            |
| Chronic myeloid leukemia        |                            | AKT1                                                                                                                       | V-akt murine thymoma viral oncogene homolog 1              |
|                                 |                            | CTBP1                                                                                                                      | C-terminal binding protein 1                               |
|                                 | HRAS                       | V-Ha-ras Harvey rat sarcoma viral oncogene homolog                                                                         |                                                            |
|                                 | IKBKB                      | Golgi autoantigen, golgin subfamily a, 7                                                                                   |                                                            |
|                                 | GAB2                       | GRB2-associated binding protein 2                                                                                          |                                                            |
|                                 | CTBP2                      | C-terminal binding protein 2                                                                                               |                                                            |
|                                 | PIK3CD                     | Phosphoinositide-3-kinase, catalytic, delta polypeptide                                                                    |                                                            |
|                                 | CBLB                       | Cas-Br-M (murine) ecotropic retroviral transforming sequence b                                                             |                                                            |
|                                 | SHC1                       | SHC (Src homology 2 domain containing) transforming protein 1                                                              |                                                            |
|                                 | SMAD3                      | SMAD family member 3                                                                                                       |                                                            |
|                                 | STAT5B                     | Signal transducer and activator of transcription 5B                                                                        |                                                            |
|                                 | CRKL                       | V-crkl sarcoma virus CT10 oncogene homolog (avian)-like                                                                    |                                                            |
|                                 | TGFBR2                     | Transforming growth factor, beta receptor II (70/80kDa)                                                                    |                                                            |
| Adipocytokine signaling pathway | AKT1                       | V-akt murine thymoma viral oncogene homolog 1                                                                              |                                                            |
|                                 | STK11                      | Serine/threonine kinase 11                                                                                                 |                                                            |
|                                 | TNF                        | Tumor necrosis factor (TNF superfamily, member 2)                                                                          |                                                            |
|                                 | IKBKB                      | Golgi autoantigen, golgin subfamily a, 7                                                                                   |                                                            |
|                                 | PRKAB2                     | Protein kinase, AMP-activated, beta 2 non-catalytic subunit                                                                |                                                            |

|                                   |        |                                                                                                         |
|-----------------------------------|--------|---------------------------------------------------------------------------------------------------------|
|                                   | IRS1   | Insulin receptor substrate 1                                                                            |
|                                   | SLC2A4 | Solute carrier family 2 (facilitated glucose transporter), member 4                                     |
| B cell receptor signaling pathway | PLCG2  | Phospholipase C, gamma 2 (phosphatidylinositol-specific)                                                |
|                                   | AKT1   | V-akt murine thymoma viral oncogene homolog 1                                                           |
|                                   | PPP3R1 | Protein phosphatase 3 (formerly 2B), regulatory subunit B, 19kDa, alpha isoform (calcineurin B, type I) |
|                                   | HRAS   | V-Ha-ras Harvey rat sarcoma viral oncogene homolog                                                      |
|                                   | CHP    | calcium binding protein P22                                                                             |
|                                   | INPP5D | Inositol polyphosphate-5-phosphatase, 145kDa                                                            |
|                                   | BLNK   | B-cell linker                                                                                           |
|                                   | IKBKB  | Golgi autoantigen, golgin subfamily a, 7                                                                |
|                                   | RAC3   | Ras-related C3 botulinum toxin substrate 3 (rho family, small GTP binding protein Rac3)                 |
|                                   | PIK3CD | Phosphoinositide-3-kinase, catalytic, delta polypeptide                                                 |
|                                   | PPP3CA | Protein phosphatase 3 (formerly 2B), catalytic subunit, alpha isoform (calcineurin A alpha)             |
|                                   | RAC1   | Ras-related C3 botulinum toxin substrate 1 (rho family, small GTP binding protein Rac1)                 |
| Fc epsilon RI signaling pathway   | PLCG2  | Phospholipase C, gamma 2 (phosphatidylinositol-specific)                                                |
|                                   | AKT1   | V-akt murine thymoma viral oncogene homolog 1                                                           |
|                                   | INPP5D | Inositol polyphosphate-5-phosphatase, 145kDa                                                            |
|                                   | HRAS   | V-Ha-ras Harvey rat sarcoma viral oncogene homolog                                                      |
|                                   | TNF    | Tumor necrosis factor (TNF superfamily, member 2)                                                       |
|                                   | RAC3   | Ras-related C3 botulinum toxin substrate 3 (rho family, small GTP binding protein Rac3)                 |
|                                   | GAB2   | GRB2-associated binding protein 2                                                                       |
|                                   | PRKCA  | Protein kinase C, alpha                                                                                 |
|                                   | PIK3CD | Phosphoinositide-3-kinase, catalytic, delta polypeptide                                                 |
|                                   | RAC1   | Ras-related C3 botulinum toxin substrate 1 (rho family, small GTP binding protein Rac1)                 |
|                                   | MAPK14 | Mitogen-activated protein kinase 14                                                                     |
| Type II diabetes mellitus         | MAFA   | V-maf musculoaponeurotic fibrosarcoma oncogene homolog A (avian)                                        |
|                                   | TNF    | Tumor necrosis factor (TNF superfamily, member 2)                                                       |
|                                   | PIK3CD | Phosphoinositide-3-kinase, catalytic, delta polypeptide                                                 |
|                                   | IRS1   | Insulin receptor substrate 1                                                                            |
|                                   | IKBKB  | Golgi autoantigen, golgin subfamily a, 7                                                                |
|                                   | SLC2A4 | Solute carrier family 2 (facilitated glucose transporter), member 4                                     |
| Focal adhesion                    | PPP1CB | Protein phosphatase 1, catalytic subunit, beta isoform                                                  |
|                                   | ACTN3  | Actinin, alpha 3                                                                                        |
|                                   | AKT1   | V-akt murine thymoma viral oncogene homolog 1                                                           |
|                                   | HRAS   | V-Ha-ras Harvey rat sarcoma viral oncogene homolog                                                      |
|                                   | ITGB1  | Integrin, beta 1 (fibronectin receptor, beta polypeptide, antigen CD29 includes MDF2, MSK12)            |
|                                   | TLN1   | Talin 1                                                                                                 |
|                                   | ACTC1  | Actin, alpha, cardiac muscle 1                                                                          |
|                                   | PRKCA  | Protein kinase C, alpha                                                                                 |
|                                   | PPP1CA | Protein phosphatase 1, catalytic subunit, alpha isoform                                                 |
|                                   | ROCK2  | Rho-associated, coiled-coil containing protein kinase 2                                                 |
|                                   | CAV2   | Caveolin 2                                                                                              |
|                                   | ITGB7  | Integrin, beta 7                                                                                        |
|                                   | HGF    | Human mRNA for hepatocyte growth factor (HGF).                                                          |
|                                   | RAC3   | Ras-related C3 botulinum toxin substrate 3 (rho family, small GTP binding protein Rac3)                 |
|                                   | PIK3CD | Phosphoinositide-3-kinase, catalytic, delta polypeptide                                                 |
|                                   | SHC1   | SHC (Src homology 2 domain containing) transforming protein 1                                           |
|                                   | GRLF1  | Glucocorticoid receptor DNA binding factor 1                                                            |
|                                   | RAC1   | Ras-related C3 botulinum toxin substrate 1 (rho family, small GTP binding protein Rac1)                 |
|                                   | CRKL   | V-crkl sarcoma virus CT10 oncogene homolog (avian)-like                                                 |
| Axon guidance                     | PPP3R1 | Protein phosphatase 3 (formerly 2B), regulatory subunit B, 19kDa, alpha isoform (calcineurin B, type I) |
|                                   | HRAS   | V-Ha-ras Harvey rat sarcoma viral oncogene homolog                                                      |

|                                              |         |                                                                                                         |
|----------------------------------------------|---------|---------------------------------------------------------------------------------------------------------|
|                                              | CHP     | calcium binding protein P22                                                                             |
|                                              | ITGB1   | Integrin, beta 1 (fibronectin receptor, beta polypeptide, antigen CD29 includes MDF2, MSK12)            |
|                                              | ROCK2   | Rho-associated, coiled-coil containing protein kinase 2                                                 |
|                                              | PPP3CA  | Protein phosphatase 3 (formerly 2B), catalytic subunit, alpha isoform (calcineurin A alpha)             |
|                                              | RAC3    | Ras-related C3 botulinum toxin substrate 3 (rho family, small GTP binding protein Rac3)                 |
|                                              | NCK2    | NCK adaptor protein 2                                                                                   |
|                                              | L1CAM   | L1 cell adhesion molecule                                                                               |
|                                              | RAC1    | Ras-related C3 botulinum toxin substrate 1 (rho family, small GTP binding protein Rac1)                 |
|                                              | CXCL12  | Chemokine (C-X-C motif) ligand 12 (stromal cell-derived factor 1)                                       |
| Calcium signaling pathway                    | ATP2A2  | ATPase, Ca <sup>++</sup> transporting, cardiac muscle, slow twitch 2                                    |
|                                              | CALM1   | Calmodulin 1 (phosphorylase kinase, delta)                                                              |
|                                              | PPP3R1  | Protein phosphatase 3 (formerly 2B), regulatory subunit B, 19kDa, alpha isoform (calcineurin B, type I) |
|                                              | PLCG2   | Phospholipase C, gamma 2 (phosphatidylinositol-specific)                                                |
|                                              | CHP     | calcium binding protein P22                                                                             |
|                                              | CACNA1I | Calcium channel, voltage-dependent, alpha 1I subunit                                                    |
|                                              | PPP3CA  | Protein phosphatase 3 (formerly 2B), catalytic subunit, alpha isoform (calcineurin A alpha)             |
|                                              | PRKCA   | Protein kinase C, alpha                                                                                 |
|                                              | SLC25A5 | Solute carrier family 25 (mitochondrial carrier; adenine nucleotide translocator), member 5             |
|                                              | ATP2B4  | ATPase, Ca <sup>++</sup> transporting, plasma membrane 4                                                |
| Pathogenic Escherichia coli infection - EHEC | TUBB8   | tubulin, beta 8                                                                                         |
|                                              | ACTC1   | Actin, alpha, cardiac muscle 1                                                                          |
|                                              | ITGB1   | Integrin, beta 1 (fibronectin receptor, beta polypeptide, antigen CD29 includes MDF2, MSK12)            |
|                                              | ROCK2   | Rho-associated, coiled-coil containing protein kinase 2                                                 |
|                                              | VIL2    | Villin 2 (ezrin)                                                                                        |
|                                              | PRKCA   | Protein kinase C, alpha                                                                                 |
|                                              | NCK2    | NCK adaptor protein 2                                                                                   |
| Long-term potentiation                       | PPP1CB  | Protein phosphatase 1, catalytic subunit, beta isoform                                                  |
|                                              | HRAS    | V-Ha-ras Harvey rat sarcoma viral oncogene homolog                                                      |
|                                              | PPP3R1  | Protein phosphatase 3 (formerly 2B), regulatory subunit B, 19kDa, alpha isoform (calcineurin B, type I) |
|                                              | CALM1   | Calmodulin 1 (phosphorylase kinase, delta)                                                              |
|                                              | CHP     | calcium binding protein P22                                                                             |
|                                              | PPP1CA  | Protein phosphatase 1, catalytic subunit, alpha isoform                                                 |
|                                              | EP300   | E1A binding protein p300                                                                                |
|                                              | PRKCA   | Protein kinase C, alpha                                                                                 |
|                                              | PPP3CA  | Protein phosphatase 3 (formerly 2B), catalytic subunit, alpha isoform (calcineurin A alpha)             |
| MAPK signaling pathway                       | DUSP4   | Dual specificity phosphatase 4                                                                          |
|                                              | HRAS    | V-Ha-ras Harvey rat sarcoma viral oncogene homolog                                                      |
|                                              | RASA2   | RAS p21 protein activator 2                                                                             |
|                                              | AKT1    | V-akt murine thymoma viral oncogene homolog 1                                                           |
|                                              | FGF7    | Fibroblast growth factor 7 (keratinocyte growth factor)                                                 |
|                                              | PPP3R1  | Protein phosphatase 3 (formerly 2B), regulatory subunit B, 19kDa, alpha isoform (calcineurin B, type I) |
|                                              | MAX     | MYC associated factor X                                                                                 |
|                                              | CHP     | calcium binding protein P22                                                                             |
|                                              | PPM1A   | Protein phosphatase 1A (formerly 2C), magnesium-dependent, alpha isoform                                |
|                                              | TNF     | Tumor necrosis factor (TNF superfamily, member 2)                                                       |
|                                              | MAP3K7  | Mitogen-activated protein kinase kinase kinase 7                                                        |
|                                              | PRKCA   | Protein kinase C, alpha                                                                                 |
|                                              | CACNA1I | Calcium channel, voltage-dependent, alpha 1I subunit                                                    |
|                                              | GNA12   | Guanine nucleotide binding protein (G protein) alpha 12                                                 |
|                                              | PPP3CA  | Protein phosphatase 3 (formerly 2B), catalytic subunit, alpha isoform (calcineurin A alpha)             |
|                                              | IKBKB   | Golgi autoantigen, golgin subfamily a, 7                                                                |
|                                              | MAP3K4  | Mitogen-activated protein kinase kinase kinase 4                                                        |

|                                  |         |                                                                                                         |
|----------------------------------|---------|---------------------------------------------------------------------------------------------------------|
|                                  | RAC3    | Ras-related C3 botulinum toxin substrate 3 (rho family, small GTP binding protein Rac3)                 |
|                                  | FGFR1   | Fibroblast growth factor receptor 1 (fms-related tyrosine kinase 2, Pfeiffer syndrome)                  |
|                                  | TRAF6   | CDNA FLJ46539 fis, clone THYMU3037836                                                                   |
|                                  | RAC1    | Ras-related C3 botulinum toxin substrate 1 (rho family, small GTP binding protein Rac1)                 |
|                                  | FGF2    | Fibroblast growth factor 2 (basic)                                                                      |
|                                  | MRAS    | Muscle RAS oncogene homolog                                                                             |
|                                  | CRKL    | V-crkl sarcoma virus CT10 oncogene homolog (avian)-like                                                 |
|                                  | TGFBR2  | Transforming growth factor, beta receptor II (70/80kDa)                                                 |
|                                  | MAPK14  | Mitogen-activated protein kinase 14                                                                     |
| Apoptosis                        | PRKAR1A | Protein kinase, cAMP-dependent, regulatory, type I, alpha (tissue specific extinguisher 1)              |
|                                  | AKT1    | V-akt murine thymoma viral oncogene homolog 1                                                           |
|                                  | BAX     | BCL2-associated X protein                                                                               |
|                                  | MYD88   | Myeloid differentiation primary response gene (88)                                                      |
|                                  | PPP3R1  | Protein phosphatase 3 (formerly 2B), regulatory subunit B, 19kDa, alpha isoform (calcineurin B, type I) |
|                                  | IL1RAP  | Interleukin 1 receptor accessory protein                                                                |
|                                  | CHP     | calcium binding protein P22                                                                             |
|                                  | TNF     | Tumor necrosis factor (TNF superfamily, member 2)                                                       |
|                                  | CASP9   | Caspase 9, apoptosis-related cysteine peptidase                                                         |
|                                  | PPP3CA  | Protein phosphatase 3 (formerly 2B), catalytic subunit, alpha isoform (calcineurin A alpha)             |
|                                  | IKBKB   | Golgi autoantigen, golgin subfamily a, 7                                                                |
|                                  | PIK3CD  | Phosphoinositide-3-kinase, catalytic, delta polypeptide                                                 |
| Regulation of actin cytoskeleton | PPP1CB  | Protein phosphatase 1, catalytic subunit, beta isoform                                                  |
|                                  | HRAS    | V-Ha-ras Harvey rat sarcoma viral oncogene homolog                                                      |
|                                  | ACTC1   | Actin, alpha, cardiac muscle 1                                                                          |
|                                  | ARPC4   | Actin related protein 2/3 complex, subunit 4, 20kDa                                                     |
|                                  | FGF7    | Fibroblast growth factor 7 (keratinocyte growth factor)                                                 |
|                                  | PPP1CA  | Protein phosphatase 1, catalytic subunit, alpha isoform                                                 |
|                                  | ROCK2   | Rho-associated, coiled-coil containing protein kinase 2                                                 |
|                                  | ACTN3   | Actinin, alpha 3                                                                                        |
|                                  | ITGB1   | Integrin, beta 1 (fibronectin receptor, beta polypeptide, antigen CD29 includes MDF2, MSK12)            |
|                                  | VIL2    | Villin 2 (ezrin)                                                                                        |
|                                  | WASF2   | CDNA clone IMAGE:3030163                                                                                |
|                                  | ITGB7   | Integrin, beta 7                                                                                        |
|                                  | PIP5K2B | Phosphatidylinositol-4-phosphate 5-kinase, type II, beta                                                |
|                                  | RAC3    | Ras-related C3 botulinum toxin substrate 3 (rho family, small GTP binding protein Rac3)                 |
|                                  | GNA12   | Guanine nucleotide binding protein (G protein) alpha 12                                                 |
|                                  | IQGAP1  | IQ motif containing GTPase activating protein 1                                                         |
|                                  | PIK3CD  | Phosphoinositide-3-kinase, catalytic, delta polypeptide                                                 |
|                                  | RAC1    | Ras-related C3 botulinum toxin substrate 1 (rho family, small GTP binding protein Rac1)                 |
|                                  | CYFIP1  | Cytoplasmic FMR1 interacting protein 1                                                                  |
|                                  | FGFR1   | Fibroblast growth factor receptor 1 (fms-related tyrosine kinase 2, Pfeiffer syndrome)                  |
|                                  | ARHGEF7 | Rho guanine nucleotide exchange factor (GEF) 7                                                          |
|                                  | GRLF1   | Glucocorticoid receptor DNA binding factor 1                                                            |
|                                  | FGF2    | Fibroblast growth factor 2 (basic)                                                                      |
|                                  | ITGAM   | Integrin, alpha M (complement component 3 receptor 3 subunit)                                           |
|                                  | MRAS    | Muscle RAS oncogene homolog                                                                             |
|                                  | CRKL    | V-crkl sarcoma virus CT10 oncogene homolog (avian)-like                                                 |
| Insulin signaling pathway        | PPP1CB  | Protein phosphatase 1, catalytic subunit, beta isoform                                                  |
|                                  | PFKL    | Phosphofructokinase, liver                                                                              |
|                                  | AKT1    | V-akt murine thymoma viral oncogene homolog 1                                                           |
|                                  | PRKAR1A | Protein kinase, cAMP-dependent, regulatory, type I, alpha (tissue specific extinguisher 1)              |
|                                  | HRAS    | V-Ha-ras Harvey rat sarcoma viral oncogene homolog                                                      |

|                        |         |                                                                                                         |
|------------------------|---------|---------------------------------------------------------------------------------------------------------|
|                        | RPS6KB1 | Ribosomal protein S6 kinase, 70kDa, polypeptide 1                                                       |
|                        | PPP1CA  | Protein phosphatase 1, catalytic subunit, alpha isoform                                                 |
|                        | CALM1   | Calmodulin 1 (phosphorylase kinase, delta)                                                              |
|                        | RHOQ    | Ras homolog gene family, member Q                                                                       |
|                        | RPS6KB2 | Ribosomal protein S6 kinase, 70kDa, polypeptide 2                                                       |
|                        | FLOT1   | Flotillin 1                                                                                             |
|                        | INPP5D  | Inositol polyphosphate-5-phosphatase, 145kDa                                                            |
|                        | IRS1    | Insulin receptor substrate 1                                                                            |
|                        | IKBKB   | Golgi autoantigen, golgin subfamily a, 7                                                                |
|                        | PRKAB2  | Protein kinase, AMP-activated, beta 2 non-catalytic subunit                                             |
|                        | GYS1    | Glycogen synthase 1 (muscle)                                                                            |
|                        | PIK3CD  | Phosphoinositide-3-kinase, catalytic, delta polypeptide                                                 |
|                        | CBLB    | Cas-Br-M (murine) ecotropic retroviral transforming sequence b                                          |
|                        | PYGB    | Phosphorylase, glycogen; brain                                                                          |
|                        | SLC2A4  | Solute carrier family 2 (facilitated glucose transporter), member 4                                     |
|                        | SHC1    | SHC (Src homology 2 domain containing) transforming protein 1                                           |
|                        | CRKL    | V-crk sarcoma virus CT10 oncogene homolog (avian)-like                                                  |
| Wnt signaling pathway  | CTBP1   | C-terminal binding protein 1                                                                            |
|                        | WNT6    | Wingless-type MMTV integration site family, member 6                                                    |
|                        | ROCK2   | Rho-associated, coiled-coil containing protein kinase 2                                                 |
|                        | CSNK2A2 | Casein kinase 2, alpha prime polypeptide                                                                |
|                        | PPP3R1  | Protein phosphatase 3 (formerly 2B), regulatory subunit B, 19kDa, alpha isoform (calcineurin B, type I) |
|                        | EP300   | E1A binding protein p300                                                                                |
|                        | CHP     | calcium binding protein P22                                                                             |
|                        | MAP3K7  | Mitogen-activated protein kinase kinase kinase 7                                                        |
|                        | PPP3CA  | Protein phosphatase 3 (formerly 2B), catalytic subunit, alpha isoform (calcineurin A alpha)             |
|                        | CTBP2   | C-terminal binding protein 2                                                                            |
|                        | PSEN1   | Presenilin 1 (Alzheimer disease 3)                                                                      |
|                        | RAC3    | Ras-related C3 botulinum toxin substrate 3 (rho family, small GTP binding protein Rac3)                 |
|                        | TBL1X   | Transducin (beta)-like 1X-linked                                                                        |
|                        | PRKCA   | Protein kinase C, alpha                                                                                 |
|                        | RAC1    | Ras-related C3 botulinum toxin substrate 1 (rho family, small GTP binding protein Rac1)                 |
|                        | SMAD3   | SMAD family member 3                                                                                    |
|                        | DVL3    | Dishevelled, dsh homolog 3 (Drosophila)                                                                 |
| VEGF signaling pathway | AKT1    | V-akt murine thymoma viral oncogene homolog 1                                                           |
|                        | PLCG2   | Phospholipase C, gamma 2 (phosphatidylinositol-specific)                                                |
|                        | HRAS    | V-Ha-ras Harvey rat sarcoma viral oncogene homolog                                                      |
|                        | PPP3R1  | Protein phosphatase 3 (formerly 2B), regulatory subunit B, 19kDa, alpha isoform (calcineurin B, type I) |
|                        | CHP     | calcium binding protein P22                                                                             |
|                        | PRKCA   | Protein kinase C, alpha                                                                                 |
|                        | CASP9   | Caspase 9, apoptosis-related cysteine peptidase                                                         |
|                        | RAC3    | Ras-related C3 botulinum toxin substrate 3 (rho family, small GTP binding protein Rac3)                 |
|                        | PIK3CD  | Phosphoinositide-3-kinase, catalytic, delta polypeptide                                                 |
|                        | PPP3CA  | Protein phosphatase 3 (formerly 2B), catalytic subunit, alpha isoform (calcineurin A alpha)             |
|                        | RAC1    | Ras-related C3 botulinum toxin substrate 1 (rho family, small GTP binding protein Rac1)                 |
|                        | MAPK14  | Mitogen-activated protein kinase 14                                                                     |
| Melanogenesis          | CALM1   | Calmodulin 1 (phosphorylase kinase, delta)                                                              |
|                        | HRAS    | V-Ha-ras Harvey rat sarcoma viral oncogene homolog                                                      |
|                        | WNT6    | Wingless-type MMTV integration site family, member 6                                                    |
|                        | EP300   | E1A binding protein p300                                                                                |
|                        | PRKCA   | Protein kinase C, alpha                                                                                 |
|                        | DVL3    | Dishevelled, dsh homolog 3 (Drosophila)                                                                 |

|                                           |                                      |                                                                                                         |
|-------------------------------------------|--------------------------------------|---------------------------------------------------------------------------------------------------------|
| Notch signaling pathway                   | CIR                                  | CBF1 interacting corepressor                                                                            |
|                                           | CTBP1                                | C-terminal binding protein 1                                                                            |
|                                           | PCAF                                 | P300/CBP-associated factor                                                                              |
|                                           | EP300                                | E1A binding protein p300                                                                                |
|                                           | PSEN1                                | Presenilin 1 (Alzheimer disease 3)                                                                      |
|                                           | CTBP2                                | C-terminal binding protein 2                                                                            |
|                                           | DVL3                                 | Dishevelled, dsh homolog 3 (Drosophila)                                                                 |
| Glioma                                    | PLCG2                                | Phospholipase C, gamma 2 (phosphatidylinositol-specific)                                                |
|                                           | AKT1                                 | V-akt murine thymoma viral oncogene homolog 1                                                           |
|                                           | PRKCA                                | Protein kinase C, alpha                                                                                 |
|                                           | CALM1                                | Calmodulin 1 (phosphorylase kinase, delta)                                                              |
|                                           | HRAS                                 | V-Ha-ras Harvey rat sarcoma viral oncogene homolog                                                      |
|                                           | SHC1                                 | SHC (Src homology 2 domain containing) transforming protein 1                                           |
|                                           | PIK3CD                               | Phosphoinositide-3-kinase, catalytic, delta polypeptide                                                 |
| Natural killer cell mediated cytotoxicity | PPP3R1                               | Protein phosphatase 3 (formerly 2B), regulatory subunit B, 19kDa, alpha isoform (calcineurin B, type I) |
|                                           | PLCG2                                | Phospholipase C, gamma 2 (phosphatidylinositol-specific)                                                |
|                                           | CHP                                  | calcium binding protein P22                                                                             |
|                                           | HRAS                                 | V-Ha-ras Harvey rat sarcoma viral oncogene homolog                                                      |
|                                           | TNF                                  | Tumor necrosis factor (TNF superfamily, member 2)                                                       |
|                                           | PRKCA                                | Protein kinase C, alpha                                                                                 |
|                                           | RAC3                                 | Ras-related C3 botulinum toxin substrate 3 (rho family, small GTP binding protein Rac3)                 |
|                                           | PIK3CD                               | Phosphoinositide-3-kinase, catalytic, delta polypeptide                                                 |
|                                           | SHC1                                 | SHC (Src homology 2 domain containing) transforming protein 1                                           |
|                                           | PPP3CA                               | Protein phosphatase 3 (formerly 2B), catalytic subunit, alpha isoform (calcineurin A alpha)             |
|                                           | ICAM2                                | Intercellular adhesion molecule 2                                                                       |
|                                           | RAC1                                 | Ras-related C3 botulinum toxin substrate 1 (rho family, small GTP binding protein Rac1)                 |
| T cell receptor signaling pathway         | PPP3R1                               | Protein phosphatase 3 (formerly 2B), regulatory subunit B, 19kDa, alpha isoform (calcineurin B, type I) |
|                                           | CHP                                  | calcium binding protein P22                                                                             |
|                                           | AKT1                                 | V-akt murine thymoma viral oncogene homolog 1                                                           |
|                                           | HRAS                                 | V-Ha-ras Harvey rat sarcoma viral oncogene homolog                                                      |
|                                           | TNF                                  | Tumor necrosis factor (TNF superfamily, member 2)                                                       |
|                                           | IKBKB                                | Golgi autoantigen, golgin subfamily a, 7                                                                |
|                                           | CBLB                                 | Cas-Br-M (murine) ecotropic retroviral transforming sequence b                                          |
|                                           | PIK3CD                               | Phosphoinositide-3-kinase, catalytic, delta polypeptide                                                 |
|                                           | PPP3CA                               | Protein phosphatase 3 (formerly 2B), catalytic subunit, alpha isoform (calcineurin A alpha)             |
|                                           | NCK2                                 | NCK adaptor protein 2                                                                                   |
|                                           | Leukocyte transendothelial migration | PLCG2                                                                                                   |
| ACTN3                                     |                                      | Actinin, alpha 3                                                                                        |
| ACTC1                                     |                                      | Actin, alpha, cardiac muscle 1                                                                          |
| ITGB1                                     |                                      | Integrin, beta 1 (fibronectin receptor, beta polypeptide, antigen CD29 includes MDF2, MSK12)            |
| MMP2                                      |                                      | Matrix metalloproteinase 2 (gelatinase A, 72kDa gelatinase, 72kDa type IV collagenase)                  |
| ROCK2                                     |                                      | Rho-associated, coiled-coil containing protein kinase 2                                                 |
| VIL2                                      |                                      | Villin 2 (ezrin)                                                                                        |
| PRKCA                                     |                                      | Protein kinase C, alpha                                                                                 |
| RASSF5                                    |                                      | Ras association (RalGDS/AF-6) domain family 5                                                           |
| PIK3CD                                    |                                      | Phosphoinositide-3-kinase, catalytic, delta polypeptide                                                 |
| RHOH                                      |                                      | Ras homolog gene family, member H                                                                       |
| GRLF1                                     |                                      | Glucocorticoid receptor DNA binding factor 1                                                            |
| RAC1                                      |                                      | Ras-related C3 botulinum toxin substrate 1 (rho family, small GTP binding protein Rac1)                 |
| ITGAM                                     |                                      | Integrin, alpha M (complement component 3 receptor 3 subunit)                                           |
| CXCL12                                    |                                      | Chemokine (C-X-C motif) ligand 12 (stromal cell-derived factor 1)                                       |
| MAPK14                                    | Mitogen-activated protein kinase 14  |                                                                                                         |

|                                         |                                     |                                                                                                                                       |
|-----------------------------------------|-------------------------------------|---------------------------------------------------------------------------------------------------------------------------------------|
| Lysine degradation                      | DLST                                | Dihydrolipoamide S-succinyltransferase (E2 component of 2-oxo-glutarate complex)                                                      |
|                                         | ACAT1                               | Acetyl-Coenzyme A acetyltransferase 1 (acetoacetyl Coenzyme A thiolase)                                                               |
|                                         | OGDH                                | Oxoglutarate (alpha-ketoglutarate) dehydrogenase (lipoamide)                                                                          |
|                                         | EHMT2                               | Euchromatic histone-lysine N-methyltransferase 2                                                                                      |
|                                         | EHMT1                               | Euchromatic histone-lysine N-methyltransferase 1                                                                                      |
|                                         | HADHA                               | Hydroxyacyl-Coenzyme A dehydrogenase/3-ketoacyl-Coenzyme A thiolase/enoyl-Coenzyme A hydratase (trifunctional protein), alpha subunit |
| Toll-like receptor signaling pathway    | AKT1                                | V-akt murine thymoma viral oncogene homolog 1                                                                                         |
|                                         | MYD88                               | Myeloid differentiation primary response gene (88)                                                                                    |
|                                         | TNF                                 | Tumor necrosis factor (TNF superfamily, member 2)                                                                                     |
|                                         | TRAF6                               | CDNA FLJ46539 fis, clone THYMU3037836                                                                                                 |
|                                         | MAP3K7                              | Mitogen-activated protein kinase kinase kinase 7                                                                                      |
|                                         | PIK3CD                              | Phosphoinositide-3-kinase, catalytic, delta polypeptide                                                                               |
|                                         | IKBKB                               | Golgi autoantigen, golgin subfamily a, 7                                                                                              |
|                                         | TLR2                                | Toll-like receptor 2                                                                                                                  |
|                                         | RAC1                                | Ras-related C3 botulinum toxin substrate 1 (rho family, small GTP binding protein Rac1)                                               |
|                                         | TICAM2                              | Toll-like receptor adaptor molecule 2                                                                                                 |
|                                         | MAPK14                              | Mitogen-activated protein kinase 14                                                                                                   |
| Long-term depression                    | HRAS                                | V-Ha-ras Harvey rat sarcoma viral oncogene homolog                                                                                    |
|                                         | GNAZ                                | Guanine nucleotide binding protein (G protein), alpha z polypeptide                                                                   |
|                                         | GNA12                               | Guanine nucleotide binding protein (G protein) alpha 12                                                                               |
|                                         | PRKCA                               | Protein kinase C, alpha                                                                                                               |
| N-Glycan biosynthesis                   | DHDDS                               | Dehydrolipichyl diphosphate synthase                                                                                                  |
|                                         | B4GALT2                             | UDP-Gal:betaGlcNAc beta 1,4- galactosyltransferase, polypeptide 2                                                                     |
|                                         | MAN1B1                              | Mannosidase, alpha, class 1B, member 1                                                                                                |
|                                         | ALG6                                | Asparagine-linked glycosylation 6 homolog (S. cerevisiae, alpha-1,3-glucosyltransferase)                                              |
|                                         | MAN1A2                              | Mannosidase, alpha, class 1A, member 2                                                                                                |
|                                         | RPN1                                | Ribophorin I                                                                                                                          |
| Neuroactive ligand-receptor interaction | DOLPP1                              | Dolichyl pyrophosphate phosphatase 1                                                                                                  |
|                                         | GH2                                 | Chorionic somatomammotropin hormone 1 (placental lactogen)                                                                            |
|                                         | GPR156                              | G protein-coupled receptor 156                                                                                                        |
|                                         | CRHR2                               | Corticotropin releasing hormone receptor 2                                                                                            |
|                                         | UTS2R                               | Urotensin 2 receptor                                                                                                                  |
|                                         | PRLH                                | Prolactin releasing hormone                                                                                                           |
| Gap junction                            | LTB4R                               | Leukotriene B4 receptor                                                                                                               |
|                                         | HRAS                                | V-Ha-ras Harvey rat sarcoma viral oncogene homolog                                                                                    |
|                                         | TUBB8                               | tubulin, beta 8                                                                                                                       |
| GnRH signaling pathway                  | PRKCA                               | Protein kinase C, alpha                                                                                                               |
|                                         | HRAS                                | V-Ha-ras Harvey rat sarcoma viral oncogene homolog                                                                                    |
|                                         | MMP2                                | Matrix metalloproteinase 2 (gelatinase A, 72kDa gelatinase, 72kDa type IV collagenase)                                                |
|                                         | HBEGF                               | Heparin-binding EGF-like growth factor                                                                                                |
|                                         | CALM1                               | Calmodulin 1 (phosphorylase kinase, delta)                                                                                            |
|                                         | PRKCA                               | Protein kinase C, alpha                                                                                                               |
|                                         | MAP3K4                              | Mitogen-activated protein kinase kinase kinase 4                                                                                      |
| MAPK14                                  | Mitogen-activated protein kinase 14 |                                                                                                                                       |
| Tight junction                          | ACTN3                               | Actinin, alpha 3                                                                                                                      |
|                                         | HRAS                                | V-Ha-ras Harvey rat sarcoma viral oncogene homolog                                                                                    |
|                                         | PRKCA                               | Protein kinase C, alpha                                                                                                               |
|                                         | AKT1                                | V-akt murine thymoma viral oncogene homolog 1                                                                                         |
|                                         | CSNK2A2                             | Casein kinase 2, alpha prime polypeptide                                                                                              |
|                                         | ACTC1                               | Actin, alpha, cardiac muscle 1                                                                                                        |
|                                         | MRAS                                | Muscle RAS oncogene homolog                                                                                                           |
| PRKCH                                   | Protein kinase C, eta               |                                                                                                                                       |

|                             |          |                                                                                                                                       |                                                         |
|-----------------------------|----------|---------------------------------------------------------------------------------------------------------------------------------------|---------------------------------------------------------|
| Tryptophan metabolism       | TRAF7    | TNF receptor-associated factor 7                                                                                                      |                                                         |
|                             | OGDH     | Oxoglutarate (alpha-ketoglutarate) dehydrogenase (lipoamide)                                                                          |                                                         |
|                             | ACAT1    | Acetyl-Coenzyme A acetyltransferase 1 (acetoacetyl Coenzyme A thiolase)                                                               |                                                         |
|                             | UHRF1    | Ubiquitin-like, containing PHD and RING finger domains, 1                                                                             |                                                         |
|                             | CYP4F8   | Cytochrome P450, family 4, subfamily F, polypeptide 8                                                                                 |                                                         |
|                             | CAT      | Catalase                                                                                                                              |                                                         |
|                             | PRMT2    | Protein arginine methyltransferase 2                                                                                                  |                                                         |
|                             | HADHA    | Hydroxyacyl-Coenzyme A dehydrogenase/3-ketoacyl-Coenzyme A thiolase/enoyl-Coenzyme A hydratase (trifunctional protein), alpha subunit |                                                         |
|                             | CNOT4    | CCR4-NOT transcription complex, subunit 4                                                                                             |                                                         |
| Colorectal cancer           | AKT1     | V-akt murine thymoma viral oncogene homolog 1                                                                                         |                                                         |
|                             | BAX      | BCL2-associated X protein                                                                                                             |                                                         |
|                             | CASP9    | Caspase 9, apoptosis-related cysteine peptidase                                                                                       |                                                         |
|                             | RAC3     | Ras-related C3 botulinum toxin substrate 3 (rho family, small GTP binding protein Rac3)                                               |                                                         |
|                             | PIK3CD   | Phosphoinositide-3-kinase, catalytic, delta polypeptide                                                                               |                                                         |
|                             | SMAD3    | SMAD family member 3                                                                                                                  |                                                         |
|                             | RAC1     | Ras-related C3 botulinum toxin substrate 1 (rho family, small GTP binding protein Rac1)                                               |                                                         |
|                             | DVL3     | Dishevelled, dsh homolog 3 (Drosophila)                                                                                               |                                                         |
|                             | TGFBR2   | Transforming growth factor, beta receptor II (70/80kDa)                                                                               |                                                         |
| Pancreatic cancer           | AKT1     | V-akt murine thymoma viral oncogene homolog 1                                                                                         |                                                         |
|                             | CASP9    | Caspase 9, apoptosis-related cysteine peptidase                                                                                       |                                                         |
|                             | RAC3     | Ras-related C3 botulinum toxin substrate 3 (rho family, small GTP binding protein Rac3)                                               |                                                         |
|                             | RALBP1   | RalA binding protein 1                                                                                                                |                                                         |
|                             | PIK3CD   | Phosphoinositide-3-kinase, catalytic, delta polypeptide                                                                               |                                                         |
|                             | IKBKB    | Golgi autoantigen, golgin subfamily a, 7                                                                                              |                                                         |
|                             | SMAD3    | SMAD family member 3                                                                                                                  |                                                         |
|                             | RAC1     | Ras-related C3 botulinum toxin substrate 1 (rho family, small GTP binding protein Rac1)                                               |                                                         |
|                             | TGFBR2   | Transforming growth factor, beta receptor II (70/80kDa)                                                                               |                                                         |
| mTOR signaling pathway      | RICTOR   | rapamycin-insensitive companion of mTOR                                                                                               |                                                         |
|                             | AKT1     | V-akt murine thymoma viral oncogene homolog 1                                                                                         |                                                         |
|                             | EIF4B    | Eukaryotic translation initiation factor 4B                                                                                           |                                                         |
|                             | RPS6KB2  | Ribosomal protein S6 kinase, 70kDa, polypeptide 2                                                                                     |                                                         |
|                             | RPS6KB1  | Ribosomal protein S6 kinase, 70kDa, polypeptide 1                                                                                     |                                                         |
|                             | PIK3CD   | Phosphoinositide-3-kinase, catalytic, delta polypeptide                                                                               |                                                         |
|                             | LYK5     | protein kinase LYK5                                                                                                                   |                                                         |
|                             | STK11    | Serine/threonine kinase 11                                                                                                            |                                                         |
|                             | Melanoma | FGF7                                                                                                                                  | Fibroblast growth factor 7 (keratinocyte growth factor) |
| AKT1                        |          | V-akt murine thymoma viral oncogene homolog 1                                                                                         |                                                         |
| HRAS                        |          | V-Ha-ras Harvey rat sarcoma viral oncogene homolog                                                                                    |                                                         |
| FGFR1                       |          | Fibroblast growth factor receptor 1 (fms-related tyrosine kinase 2, Pfeiffer syndrome)                                                |                                                         |
| HGF                         |          | Human mRNA for hepatocyte growth factor (HGF).                                                                                        |                                                         |
| FGF2                        |          | Fibroblast growth factor 2 (basic)                                                                                                    |                                                         |
| PIK3CD                      |          | Phosphoinositide-3-kinase, catalytic, delta polypeptide                                                                               |                                                         |
| Neurodegenerative Disorders | BAX      | BCL2-associated X protein                                                                                                             |                                                         |
|                             | PRNP     | Prion protein (p27-30) (Creutzfeldt-Jakob disease, Gerstmann-Strausler-Scheinker syndrome, fatal familial insomnia)                   |                                                         |
|                             | PSEN1    | Presenilin 1 (Alzheimer disease 3)                                                                                                    |                                                         |
|                             | EP300    | E1A binding protein p300                                                                                                              |                                                         |
|                             | GFAP     | Glial fibrillary acidic protein                                                                                                       |                                                         |
| Propanoate metabolism       | MUT      | Methylmalonyl Coenzyme A mutase                                                                                                       |                                                         |
|                             | ACAT1    | Acetyl-Coenzyme A acetyltransferase 1 (acetoacetyl Coenzyme A thiolase)                                                               |                                                         |
|                             | HADHA    | Hydroxyacyl-Coenzyme A dehydrogenase/3-ketoacyl-Coenzyme A thiolase/enoyl-Coenzyme A hydratase (trifunctional protein), alpha subunit |                                                         |
| Selenoamino acid metabolism | SEPHS1   | Selenophosphate synthetase 1                                                                                                          |                                                         |
|                             | PRMT2    | Protein arginine methyltransferase 2                                                                                                  |                                                         |



|                                           |        |                                                                                                                     |
|-------------------------------------------|--------|---------------------------------------------------------------------------------------------------------------------|
| Thyroid cancer                            | GGT1   | Gamma-glutamyltransferase 1                                                                                         |
|                                           | HRAS   | V-Ha-ras Harvey rat sarcoma viral oncogene homolog                                                                  |
|                                           | CCDC6  | Coiled-coil domain containing 6                                                                                     |
|                                           | TPM3   | Tropomyosin 3                                                                                                       |
| SNARE interactions in vesicular transport | STX6   | Syntaxin 6                                                                                                          |
|                                           | YKT6   | YKT6 v-SNARE homolog (S. cerevisiae)                                                                                |
|                                           | STX16  | Syntaxin 16                                                                                                         |
| Starch and sucrose metabolism             | HK2    | Hexokinase 2                                                                                                        |
|                                           | PYGB   | Phosphorylase, glycogen; brain                                                                                      |
|                                           | AGL    | Amylo-1, 6-glucosidase, 4-alpha-glucanotransferase (glycogen debranching enzyme, glycogen storage disease type III) |
|                                           | GYS1   | Glycogen synthase 1 (muscle)                                                                                        |
|                                           | UGT2B7 | UDP glucuronosyltransferase 2 family, polypeptide B7                                                                |
| Prion disease                             | PRNP   | Prion protein (p27-30) (Creutzfeldt-Jakob disease, Gerstmann-Strausler-Scheinker syndrome, fatal familial insomnia) |
|                                           | TNF    | Tumor necrosis factor (TNF superfamily, member 2)                                                                   |
|                                           | GFAP   | Glial fibrillary acidic protein                                                                                     |
